# Supplementary material for: Regioselective ortho C–H insertion of N-nitrosoanilines with naphthoquinone carbenes
Source: Royal Society of Chemistry journal article supplement (doi:10.1039/d3ob01104f), 2023-01-01

## Supporting information

### Regioselective *ortho* C–H Insertion of *N*-Nitrosoanilines with Naphthoquinone Carbenes

Rui-jun Peng, Yuan Chen, Xue-jing Zhang, Ming Yan\*

*Guangdong Provincial Key Laboratory of Chiral Molecules and Drug Discovery, School of  
Pharmaceutical Sciences, Sun Yat-sen University, Guangzhou 510006, China*

E-mail: yanming@mail.sysu.edu.cn

|                                                             |    |
|-------------------------------------------------------------|----|
| 1. General Information.....                                 | 2  |
| 2. General procedure for the preparation of substrates..... | 3  |
| 3. General experimental procedure.....                      | 5  |
| 4. Transformations of product <b>3a</b> .....               | 7  |
| 5. Control experiments.....                                 | 12 |
| 6. Characterization data for products.....                  | 15 |
| 7. X-ray structure of <b>3a</b> .....                       | 27 |
| 8. References.....                                          | 28 |
| 9. NMR spectra of products.....                             | 29 |

## 1. General Information

$^1\text{H}$  NMR and  $^{13}\text{C}$  NMR spectra were recorded on Bruker AVANCE 400 MHz or 500 MHz spectrometer. Chemical shifts of protons are reported in parts per million downfield from tetramethylsilane. Chemical shifts of carbon are referenced to the center line of a triplet at 77.0 ppm of chloroform- $d_3$ , a heptet at 39.5 ppm of dimethyl sulfoxide- $d_6$  or a heptet at 29.8 ppm of acetone- $d_6$ . Peaks are labeled as single (s), broad singlet (bs), doublet (d), triplet (t), quartet (q), double doublet (dd), triple doublet (td), multiplet (m). Melting points were determined with a commercially available melting point apparatus. High-resolution mass spectra (HRMS) were acquired using an electron spray ionization time of flight (ESI-TOF) mass spectrometer in positive mode. All reagents were used without further purification as received from commercial suppliers unless otherwise noted. All solvents were dried and distilled prior to use according to the standard protocols.

## 2. General procedure for the preparation of substrates

### 2.1 Preparation of *N*-nitrosoaniline **1** (taking **1a** as an example)<sup>1</sup>

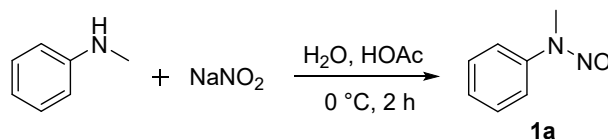

Scheme S1. Preparation of **1a**

To a solution of *N*-CH<sub>3</sub> aniline (1.1 g, 10 mmol) in a mixture of acetic acid (5 mL) and water (1 mL), an aqueous solution of NaNO<sub>2</sub> (1.0 g, 15 mmol) in water (3 mL) was added at 0 °C (in an ice-water bath). The reaction mixture was stirred for 2 h, then extracted with CH<sub>2</sub>Cl<sub>2</sub>. The organic layer was washed with brine, and dried over sodium sulfate. The solvent was evaporated to give a residue, which was purified by flash chromatography to give yellow oil **1a** (1.3 g, 92%).

### 2.2 Preparation of diazonaphthoquinones **2a–2j** (taking **2a** as an example)<sup>2</sup>

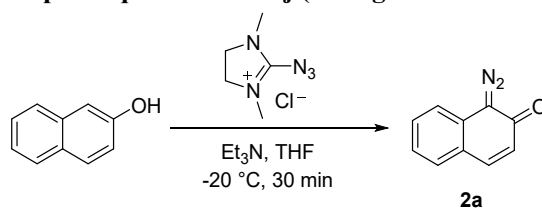

Scheme S2. Preparation of **2a**

To a solution of 2-chloro-1,3-dimethylimidazoliumchloride (253.6 mg, 1.5 mmol) in acetonitrile (2.0 mL), sodium azide (108.6 mg, 1.7 mmol) was added at -20 °C and the mixture was stirred for 30 min. A mixture of 2-naphthol (144.7 mg, 1.0 mmol) and triethylamine (202.4 mg, 2.0 mmol) in dry THF (4.0 mL) was added to the reaction mixture and was stirred for 20 min. The reaction was quenched with ice water and organic parts were extracted with CH<sub>2</sub>Cl<sub>2</sub> (3 x 15 mL). The combined extracts were washed with water and brine, and then dried over anhydrous Na<sub>2</sub>SO<sub>4</sub>. The solvent was removed in vacuo to afford crude compounds. The crude materials were purified by flash chromatography to give brown solid **2a** (127.6 mg, 75%).

### 2.3 Preparation of 2,6-dibromo-4-diazocyclohexa-2,5-dien-1-one **2k**<sup>3</sup>

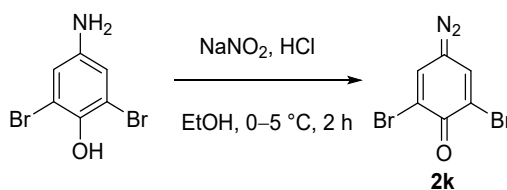

Scheme S3. Preparation of **2k**

To a solution of 4-amino-2,6-dibromophenol (266.9 mg, 1 mmol) in ethanol (5 mL), concentrated HCl (12 N, 0.5 mL) was added drop wise at 0–5 °C. The mixture was allowed to stir at the same temperature for another 10 min, then an ice-cold solution of NaNO<sub>2</sub> (207 mg, 3 mmol) was added to the mixture drop wise. The resulting mixture was allowed to stir at 0–5 °C for 2 h. It was diluted with 10 mL cold dichloromethane followed by the addition of ice. Then, the mixture was stirred vigorously with a cold solution of K<sub>2</sub>CO<sub>3</sub> (7 mmol). The organic layer was separated with dichloromethane, and the aqueous layer was extracted with dichloromethane. The organic layer was dried over anhydrous Na<sub>2</sub>SO<sub>4</sub>, concentrated in vacuo at low temperature, and directly used in the next reaction without further purification.

### 3. General experimental procedure

#### 3.1 Optimization of reaction conditions

**Table S1.** Screening of additive and optimization of reaction conditions<sup>a</sup>

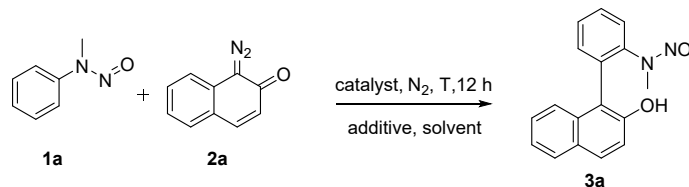

| Entry | Catalyst (mol%)                                            | Additive 1 (mol%)       | Additive 2 (mol%) | solvent     | T (°C) | Yield <sup>b</sup> (%) |
|-------|------------------------------------------------------------|-------------------------|-------------------|-------------|--------|------------------------|
| 1     | [Cp*RhCl <sub>2</sub> ] <sub>2</sub> (2.5)                 | AgSbF <sub>6</sub> (15) |                   | DCE         | r.t.   | 68                     |
| 2     | Cp*Co(CO)I <sub>2</sub> (2.5)                              | AgSbF <sub>6</sub> (15) |                   | DCE         | r.t.   | 0                      |
| 3     | [RuCl <sub>2</sub> ( <i>p</i> -cymene)] <sub>2</sub> (2.5) | AgSbF <sub>6</sub> (15) |                   | DCE         | r.t.   | 0                      |
| 4     | [Cp*IrCl <sub>2</sub> ] <sub>2</sub> (2.5)                 | AgSbF <sub>6</sub> (15) |                   | DCE         | r.t.   | 0                      |
| 5     | [Cp*RhCl <sub>2</sub> ] <sub>2</sub> (2.5)                 | AgSbF <sub>6</sub> (15) | AgOAc (15)        | DCE         | r.t.   | 72                     |
| 6     | [Cp*RhCl <sub>2</sub> ] <sub>2</sub> (2.5)                 | AgSbF <sub>6</sub> (15) | NaOAc (15)        | DCE         | r.t.   | 86 (85 <sup>c</sup> )  |
| 7     | [Cp*RhCl <sub>2</sub> ] <sub>2</sub> (2.5)                 | AgSbF <sub>6</sub> (15) | NaOAc (15)        | MeOH        | r.t.   | 23                     |
| 8     | [Cp*RhCl <sub>2</sub> ] <sub>2</sub> (2.5)                 | AgSbF <sub>6</sub> (15) | NaOAc (15)        | THF         | r.t.   | 32                     |
| 9     | [Cp*RhCl <sub>2</sub> ] <sub>2</sub> (2.5)                 | AgSbF <sub>6</sub> (15) | NaOAc (15)        | 1,4-Dioxane | r.t.   | 0                      |
| 10    | [Cp*RhCl <sub>2</sub> ] <sub>2</sub> (2.5)                 | AgSbF <sub>6</sub> (15) | NaOAc (15)        | DMSO        | r.t.   | 0                      |
| 11    | [Cp*RhCl <sub>2</sub> ] <sub>2</sub> (2.5)                 | AgOAc (15)              | NaOAc (15)        | DCE         | 60     | 73                     |

<sup>a</sup>Reaction conditions: **1a** (0.2 mmol), **2a** (0.2 mmol), solvent (2.0 mL) under N<sub>2</sub> for 12 h; <sup>b</sup>Yield determined by <sup>1</sup>H NMR using 1,3,5-trimethoxybenzene as the internal standard; <sup>c</sup>Isolated yield after column chromatography.

#### 3.2 General procedure for the synthesis of compound 3 (taking 3a as an example)

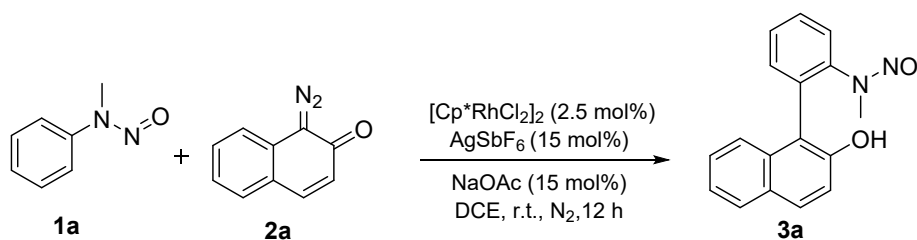

**Scheme S4.** Preparation of compound **3a**

A 25 mL reaction tube equipped with a magnetic stirrer bar were charged with  $[\text{Cp}^*\text{RhCl}_2]_2$  (4.6 mg, 2.5 mol%),  $\text{AgSbF}_6$  (15.5 mg, 15 mol%),  $\text{NaOAc}$  (7.5 mg, 15 mol%), **1a** (40.8 mg, 0.3 mmol), and DCE (1.5 mL). To the mixture was then added 1-diazonaphthalen-2(1H)-one **2a** (51.0 mg, 0.3 mmol) in DCE (1.5 mL). The reaction mixture was stirred at r.t. under  $\text{N}_2$  atmosphere for 12 h. The crude mixture was filtered through celite and concentrated under reduced pressure. The residue was then purified by flash chromatography (petroleum ether (PE): ethyl acetate (EA) = 20:1–4:1) to give the desired product **3a** (71.7 mg, 85%) as a yellow solid.

### 3.3 Gram Scale Experiment of compound 3a

A 50 mL flask equipped with a magnetic stirrer bar were charged with  $[\text{Cp}^*\text{RhCl}_2]_2$  (61.8 mg, 2.5 mol%),  $\text{AgSbF}_6$  (206.1 mg, 15 mol%),  $\text{NaOAc}$  (49.3 mg, 15 mol%), **1a** (544.2 mg, 4 mmol), and DCE (10 mL). To the mixture was then added 1-diazonaphthalen-2(1H)-one **2a** (680.7 mg, 3 mmol) in DCE (10 mL). The reaction mixture was stirred at r.t. under  $\text{N}_2$  atmosphere for 12 h. The crude mixture was filtered through celite and concentrated under reduced pressure. The residue was then purified by flash chromatography to give the desired product **3a** (924.1 mg, 83%) as a yellow solid.

## 4. Transformations of product 3a

### 4.1 Preparation of compound 4 and 5

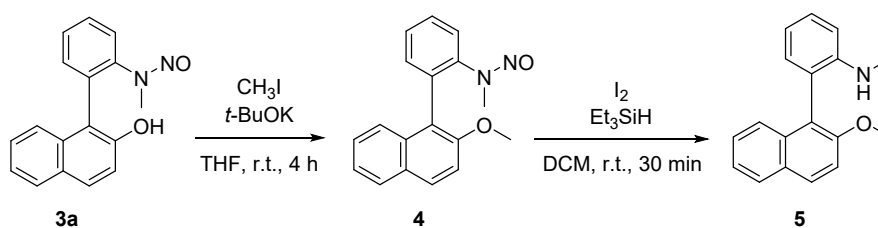

Preparation of compound 4 and 5 (see the article **Scheme 4a**)

#### (1) Preparation of compound 4

In a 50 mL round bottom flask, **3a** (139.0 mg, 0.5 mmol), potassium *tert*-butoxide (67.4 mg, 0.6 mmol) and dry THF (5 mL) were added at r.t. under N<sub>2</sub> atmosphere. Then, CH<sub>3</sub>I (85.2 mg, 0.6 mmol) was added drop wise by a syringe. The mixture was stirred at r.t. for 4 h. After completion of the reaction, mixture was quenched with saturated NH<sub>4</sub>Cl solution and extracted with DCM (3 x 10 mL). The combined organic layer was dried over anhydrous Na<sub>2</sub>SO<sub>4</sub> and concentrated in vacuo. The crude product was purified by flash chromatography to obtain product **4** (143.2 mg, 98% yield) as a white solid.

#### (2) Preparation of compound 5<sup>4</sup>

In a 25 mL round bottom flask, **4** (87.6 mg, 0.3 mmol) was allowed to stir in DCM (3 mL) approximately for 2 min at r.t. to which iodine (22.9 mg, 0.3 mmol) and triethylsilane (52.3 mg, 0.45 mmol) was added. The reaction was further allowed to stir for 30 min and the progress of the reaction was monitored by TLC. After completion, the reaction mixture was quenched with saturated solution of sodium thiosulfate (20 mL) extracted with ethyl acetate (2 x 25 mL). The organic layer was dried over anhydrous Na<sub>2</sub>SO<sub>4</sub> and concentrated in vacuo. The crude product was purified by flash chromatography to obtain product **5** (65.0 mg, 82% yield) as a yellow oil.

### 4.2 Preparation of compound 6

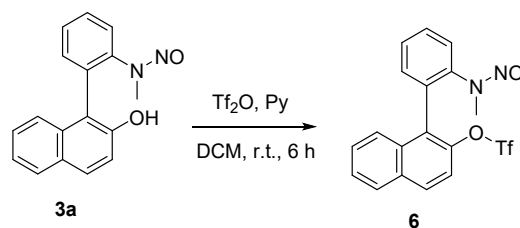

Preparation of compound 6 (see the article **Scheme 4b**)

To a solution of **3a** (139.0 mg, 0.5 mmol) in dry CH<sub>2</sub>Cl<sub>2</sub>, pyridine (79.1 mg, 1.0 mmol) was added and the solution was cooled to 0 °C. Next, trifluoromethanesulfonic anhydride (169.3 mg, 0.6 mmol) was added dropwise and stirred for 6 h at r.t.. After completion of the reaction time, the reaction mixture was concentrated under reduced pressure. The crude product was purified by column chromatography to obtain product **6** (170.2 mg, 83%) as a yellow oil.

#### 4.3 Preparation of compound 7

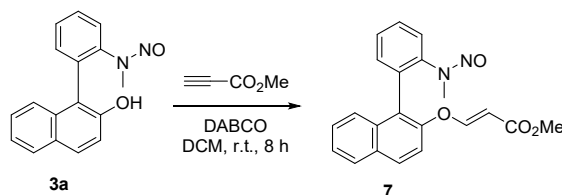

Preparation of **7** (see the article **Scheme 4c**)

In an oven dried 25 mL round bottom flask, **3a** (83.5 mg, 0.3 mmol) was dissolved in dry DCM (5 mL). Then DABCO (3.36 mg, 0.03 mmol) and methyl propiolate (30.6 mg, 0.36 mmol) were added. The reaction mixture was allowed to stir at r.t. for 7 h under N<sub>2</sub> atmosphere. The solvent was evaporated under reduced pressure. The residue was purified by flash chromatography to obtain product **7** (98.5 mg, 91%) as a yellow oil.

#### 4.4 Preparation of compound 8

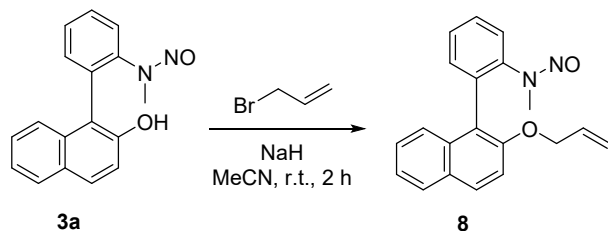

Preparation of compound **8** (see the article **Scheme 4d**)

To a dry three-neck flask was charged with **3a** (55.7 mg, 0.2 mmol), NaH (49.9 mg, 1.0 mmol) and MeCN (3 mL) under N<sub>2</sub> atmosphere. The reaction mixture was stirred vigorously at r.t. for 0.5 h and allylbromide (242.0 mg, 2.0 mmol) dissolved in MeCN (2 mL) was added. The reaction mixture was stirred vigorously at r.t. for 2 h until the substrate **3a** disappeared (monitored by TLC). At this time, the reaction was quenched by H<sub>2</sub>O (10 mL) and extracted with DCM (3 x 10 mL). Then, the combined organic layers were washed with brine (10 mL), dried over Na<sub>2</sub>SO<sub>4</sub>, and filtered. The solvent was removed under reduced pressure and the crude product was purified by silica gel column chromatography to obtain product **8** (60.0 mg, 94%) as a yellow oil.



#### 4.5 Preparation of axially chiral biaryl product

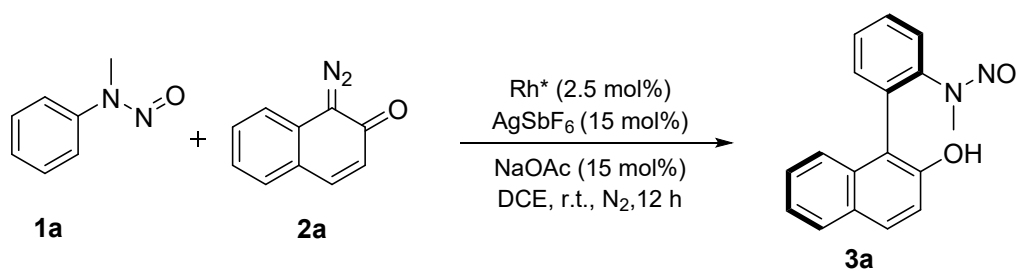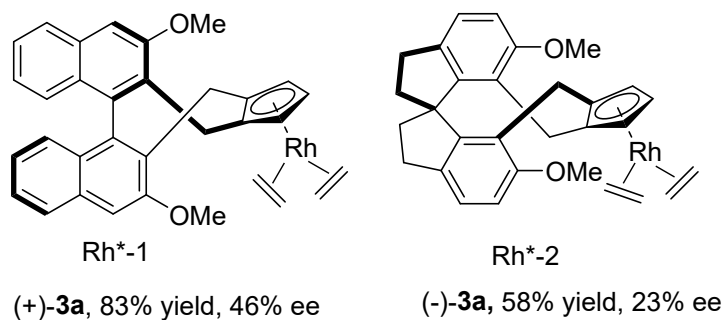

A 25 mL reaction tube equipped with a magnetic stirrer bar were charged with Cat. [Rh] (0.00125mmol, 2.5 mol%), AgSbF<sub>6</sub> (2.6 mg, 15 mol%), NaOAc (0.7 mg, 15 mol%), **1a** (6.8 mg, 0.05 mmol), and DCE (0.25 mL). To the mixture was then added 1-diazonaphthalen-2(1H)-one **2a** (8.5 mg, 0.05 mmol) in DCE (0.25 mL). The reaction mixture was stirred at r.t. under N<sub>2</sub> atmosphere for 12 h. The crude mixture was filtered through celite and concentrated under reduced pressure. The residue was then purified by flash chromatography) to give the product **3a**.

#### Racemic Product 3a

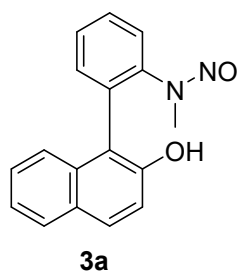

HPLC condition: Chiralpak AS-H (Hex/iPrOH = 90/10, 1.0 mL/min, t<sub>R</sub> (major) = 13.205 min, t<sub>R</sub> (minor) = 19.159 min).

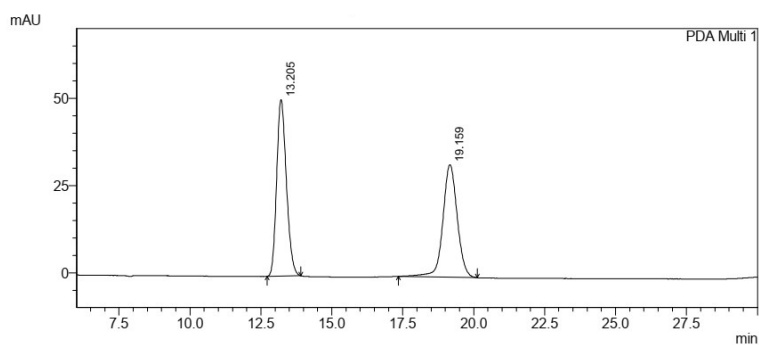

| PeakTable |           |         |        |         |          |
|-----------|-----------|---------|--------|---------|----------|
| Peak#     | Ret. Time | Area    | Height | Area %  | Height % |
| 1         | 13.205    | 1207648 | 50633  | 51.507  | 61.045   |
| 2         | 19.159    | 1136995 | 32311  | 48.493  | 38.955   |
| Total     |           | 2344643 | 82944  | 100.000 | 100.000  |

(+)-**3a**, 83% yield, 46% ee;  $[\alpha]_D^{20} = 5.0$  (c=1.0 in MeCN).

HPLC condition: Chiralpak AS-H (Hex/*i*PrOH = 90/10, 1.0 mL/min,  $t_R$  (major) = 13.195 min,  $t_R$  (minor) = 19.171 min).

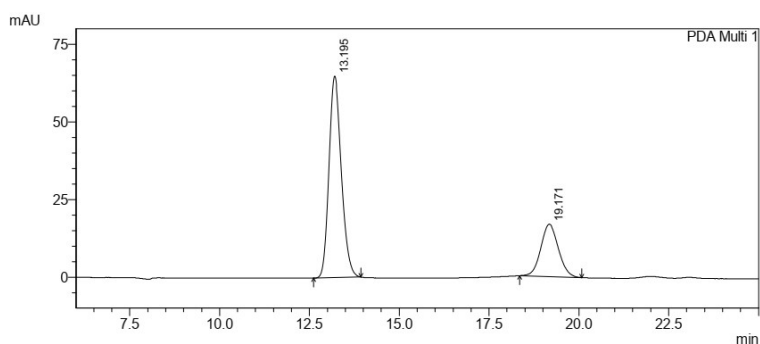

| PeakTable |           |         |        |         |          |
|-----------|-----------|---------|--------|---------|----------|
| Peak#     | Ret. Time | Area    | Height | Area %  | Height % |
| 1         | 13.195    | 1566468 | 65007  | 73.099  | 79.383   |
| 2         | 19.171    | 576479  | 16883  | 26.901  | 20.617   |
| Total     |           | 2142947 | 81891  | 100.000 | 100.000  |

(-)-**3a**, 58% yield, 23% ee;  $[\alpha]_D^{25} = -3.0$  (c=1.0 in MeCN).

HPLC condition: Chiralpak AS-H (Hex/*i*PrOH = 90/10, 1.0 mL/min,  $t_R$  (minor) = 13.199 min),  $t_R$  (major) = 19.120 min.

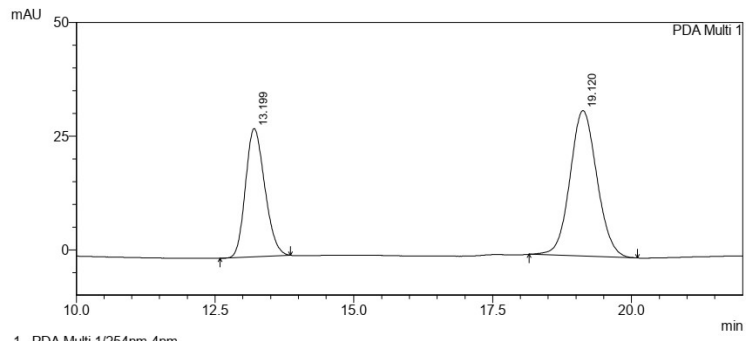

1 PDA Multi 1/254nm 4nm

PeakTable

| Peak# | Ret. Time | Area    | Height | Area %  | Height % |
|-------|-----------|---------|--------|---------|----------|
| 1     | 13.199    | 681892  | 28249  | 38.637  | 46.849   |
| 2     | 19.120    | 1082959 | 32049  | 61.363  | 53.151   |
| Total |           | 1764850 | 60298  | 100.000 | 100.000  |

## 5. Control experiments

### 5.1 Electronic effect

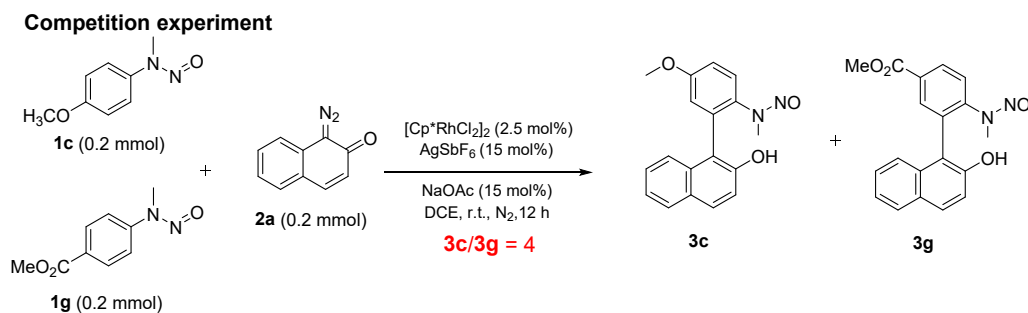

Competition experiment of **1c**, **1g** with **2a** (see the article **Scheme 5a**)

A 25 mL reaction tube equipped with a magnetic stirrer bar were charged with  $[\text{Cp}^*\text{RhCl}_2]_2$  (3.1 mg, 2.5 mol%),  $\text{AgSbF}_6$  (10.3 mg, 15 mol%),  $\text{AgOAc}$  (5.0 mg, 15 mol%), **1c** (33.2 mg, 0.2 mmol), **1g** (38.8 mg, 0.2 mmol) and DCE (1 mL). To the mixture was added **2a** (34.1 mg, 0.2 mmol) in DCE (1 mL). The reaction mixture was stirred at r.t. under  $\text{N}_2$  atmosphere for 12 h. The crude mixture was filtered through celite and concentrated in vacuo. The residue was then purified by flash column chromatography. The ratio of **3c** and **3h** was determined to be 4:1 by  $^1\text{H}$  NMR analysis.

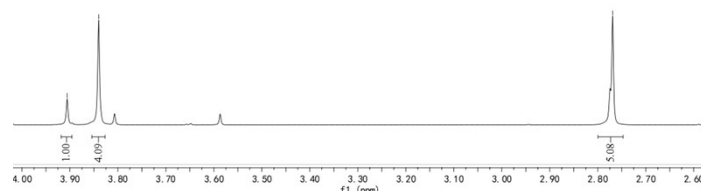

**Figure S1**  $^1\text{H}$  NMR spectra of the mixture of **3c** and **3h**

### 5.2 Kinetic isotopic effects

#### a) Preparation of compound **1a-d<sub>5</sub>**<sup>1,4</sup>

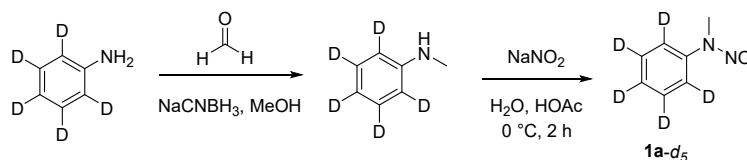

**Scheme S5.** Preparation of compound **1a-d<sub>5</sub>**

To a solution of  $d_5$ -aniline (490.8 mg, 5 mmol) in methanol (10 mL) was added formaldehyde (243.2 mg, 3 mmol, 37% w/w in  $\text{H}_2\text{O}$ ), and  $\text{NaCNBH}_3$  (282.8 mg, 4.5 mmol). The solution was stirred at 25 °C for 12 h, then extracted with  $\text{CH}_2\text{Cl}_2$ , and the organic layer was washed with brine, and dried

over sodium sulfate. The solvent was evaporated to give a residue, which was purified by flash chromatography to give *d*<sub>5</sub>-*N*-methylaniline (60.1 mg, 18%) as a yellow oil.

To a solution of *d*<sub>5</sub>-*N*-methylaniline (44.9 mg, 0.4 mmol) in a mixture of acetic acid (3 mL) and water (0.5 mL), an aqueous solution of NaNO<sub>2</sub> (41.4 mg, 0.6 mmol) in water (1 mL) was added at 0 °C (in an ice-water bath). The reaction mixture was stirred for 2 h, then extracted with CH<sub>2</sub>Cl<sub>2</sub>. Then the organic layer was washed with brine, and dried over sodium sulfate. The solvent was evaporated to give a residue, which was purified by flash-chromatography to give a yellow oil **1a-d**<sub>5</sub> (53.5 mg, 95%). <sup>1</sup>H NMR (400 MHz, CDCl<sub>3</sub>): δ 3.47 (s, 3H).

### <sup>1</sup>H NMR (400 MHz) Spectrum of **1a-d**<sub>5</sub> in CDCl<sub>3</sub>

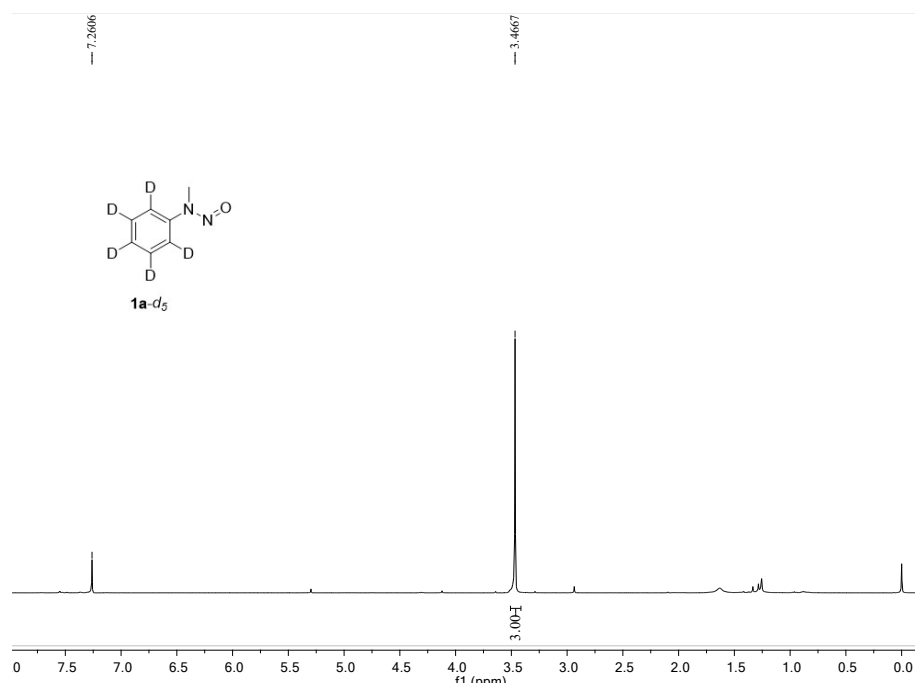

## b) Determination of KIE

### Competitive experiment

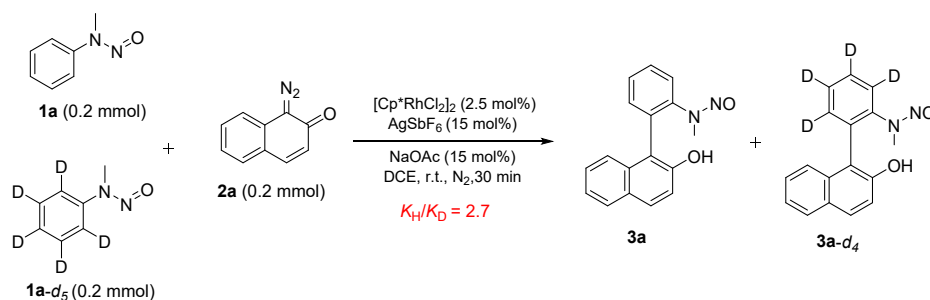

Intermolecular competition experiment of **1a**, **1a-d**<sub>5</sub> with **2a** (see the article **Scheme 5b**)

A 25 mL reaction tube equipped with a magnetic stirrer bar were charged with [Cp<sup>\*</sup>RhCl<sub>2</sub>]<sub>2</sub> (3.1 mg,

2.5 mol%), AgSbF<sub>6</sub> (10.3 mg, 15 mol%), AgOAc (5.0 mg, 15 mol%), **1a** (27.2 mg, 0.2 mmol), **1a-d<sub>5</sub>** (38.2 mg, 0.2 mmol), and DCE (1 mL). To the mixture was added **2a** (34.1 mg, 0.2 mmol) in DCE (1 mL). The reaction mixture was stirred at r.t. under N<sub>2</sub> atmosphere for 30 min. The crude mixture was filtered through celite and concentrated under reduced pressure. The residue was then purified by flash column chromatography to afford the mixture of **3a** and **3a-d<sub>4</sub>**. The ratio of **3a** and **3a-d<sub>4</sub>** was determined to be 0.73: 0.27 by <sup>1</sup>H NMR analysis (DMSO-*d*<sub>6</sub>). The KIE value is equal to 2.7.

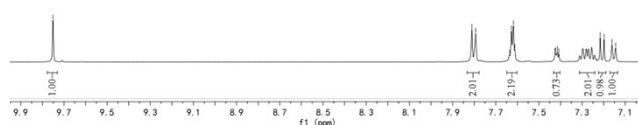

**Figure S2** <sup>1</sup>H NMR spectra of the mixture of **3a** and **3a-d<sub>4</sub>**

### Parallel experiment

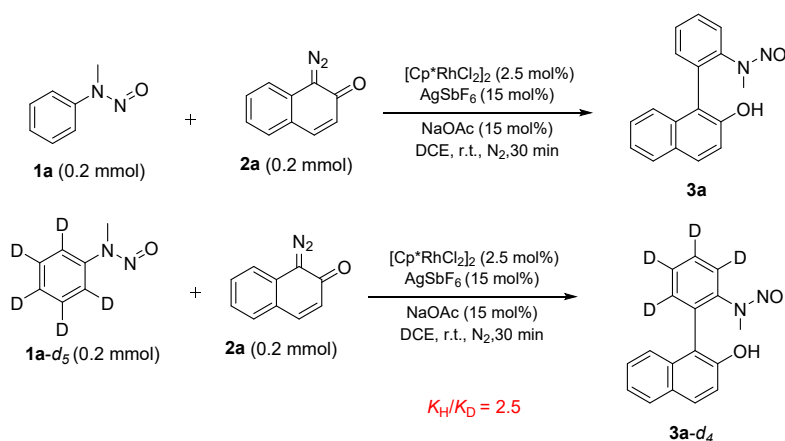

parallel experiment of **1a**, **1a-d<sub>5</sub>** with **2a** (see the article **Scheme 5c**)

A 25 mL reaction tube equipped with a magnetic stirrer bar were charged with [Cp\*RhCl<sub>2</sub>]<sub>2</sub> (3.1 mg, 2.5 mol%), AgSbF<sub>6</sub> (10.3 mg, 15 mol%), AgOAc (5.0 mg, 15 mol%), **1a** (27.2 mg, 0.2 mmol) and DCE (1 mL). To the mixture was added **2a** (34.1 mg, 0.2 mmol) in DCE (1 mL). The reaction mixture was stirred at r.t. under N<sub>2</sub> atmosphere for 30 min. The crude mixture was filtered through celite and concentrated under reduced pressure. The residue was then purified by flash column chromatography to afford the mixture of **3a** (37mg, 66.47%yield).

In another reaction tube, **1a-d<sub>5</sub>** (28.2 mg, 0.2 mmol) was used instead of **1a**. The product **3a-d<sub>4</sub>** was obtained in a (15mg, 26.56%yield). The kinetic isotope effect (KIE) is determined as 2.5.

## 6. Characterization data for products

### *N*-(2-(2-hydroxynaphthalen-1-yl)phenyl)-*N*-methylnitrous amide (3a)

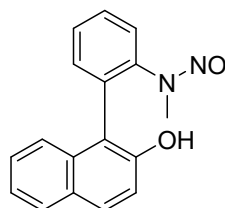

Yellow solid (71.1 mg, 85% yield), *syn:anti* = 10:1 (by  $^1\text{H NMR}$  ). The NMR data listed here represent peak information only for the major *syn* isomer. **Mp**: 161.3–161.6 °C;  $^1\text{H NMR}$  (400 MHz,  $\text{CDCl}_3$ ):  $\delta$  7.83–7.74 (m, 2H), 7.68–7.60 (m, 3H), 7.55–7.48 (m, 1H), 7.34–7.29 (m, 2H), 7.27–7.22 (m, 1H), 7.17 (d,  $J$  = 8.9 Hz, 1H), 5.43 (s, 1H), 2.79 (s, 3H);  $^{13}\text{C NMR}$  (101 MHz,  $\text{CDCl}_3$ ):  $\delta$  150.7, 142.9, 133.4, 132.8, 130.5, 130.2(1), 130.1(6), 129.8, 128.8, 128.2, 127.1, 126.5, 123.9, 123.7, 117.8, 117.2, 34.5; **HRMS (ESI)**: calculated for  $\text{C}_{17}\text{H}_{13}\text{N}_2\text{O}_2$   $[\text{M}-\text{H}]^-$ : 277.0983, found: 277.0980.

### *N*-(2-(2-hydroxynaphthalen-1-yl)-4-methylphenyl)-*N*-methylnitrous amide (3b)

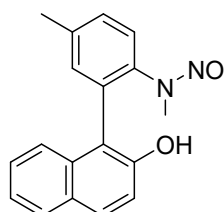

Yellow solid (79.5 mg, 91% yield), *syn:anti* = 10:1 (by  $^1\text{H NMR}$  ). The NMR data listed here represent peak information only for the major *syn* isomer. **Mp**: 133.1–133.8 °C;  $^1\text{H NMR}$  (400 MHz,  $\text{CDCl}_3$ ):  $\delta$  7.77 (d,  $J$  = 8.8 Hz, 2H), 7.50 (d,  $J$  = 8.1 Hz, 1H), 7.44 (d,  $J$  = 8.0 Hz, 1H), 7.36–7.27 (m, 3H), 7.26–7.22 (m, 1H), 7.17 (d,  $J$  = 8.9 Hz, 1H), 5.46 (s, 1H), 2.78 (s, 3H), 2.49 (s, 3H);  $^{13}\text{C NMR}$  (101 MHz,  $\text{CDCl}_3$ ):  $\delta$  150.7, 140.4, 140.1, 133.7, 132.8, 130.4(3), 130.3(8), 129.9, 128.8, 128.2, 127.0, 126.4, 124.0, 123.6, 117.8, 117.3, 34.5, 21.1; **HRMS (ESI)**: calculated for  $\text{C}_{18}\text{H}_{15}\text{N}_2\text{O}_2$   $[\text{M}-\text{H}]^-$ : 291.1139, found: 291.1141.

### *N*-(2-(2-hydroxynaphthalen-1-yl)-4-methoxyphenyl)-*N*-methylnitrous amide (3c)

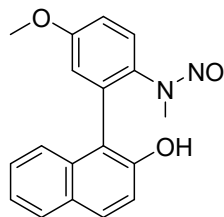

Yellow solid (87.4 mg, 95% yield), *syn:anti* = 8:1 (by  $^1\text{H}$  NMR ). The NMR data listed here represent peak information only for the major *syn* isomer. **Mp**: 173.0–173.6 °C;  **$^1\text{H}$  NMR** (400 MHz,  $\text{CDCl}_3$ ):  $\delta$  7.77 (d,  $J$  = 8.4 Hz, 2H), 7.51 (d,  $J$  = 8.8 Hz, 1H), 7.38–7.27 (m, 3H), 7.21–7.10 (m, 2H), 7.02–6.99 (m, 1H), 5.61 (s, 1H), 3.87 (s, 3H), 2.77 (s, 3H);  **$^{13}\text{C}$  NMR** (101 MHz,  $\text{CDCl}_3$ ):  $\delta$  160.4, 150.7, 135.9, 132.7, 131.9, 130.5, 128.8, 128.2, 128.0, 127.1, 123.9, 123.6, 117.9, 117.8, 117.1, 115.3, 55.7, 34.8; **HRMS (ESI)**: calculated for  $\text{C}_{18}\text{H}_{15}\text{N}_2\text{O}_3$   $[\text{M}-\text{H}]^-$ : 307.1088, found: 307.1089.

***N*-(4-fluoro-2-(2-hydroxynaphthalen-1-yl)phenyl)-*N*-methylnitrous amide (3d)**

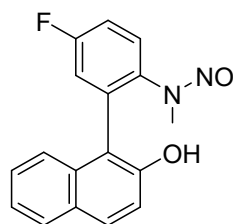

Yellow solid (61.1 mg, 69% yield), *syn:anti* = 10:1 (by  $^1\text{H}$  NMR ). The NMR data listed here represent peak information only for the major *syn* isomer. **Mp**: 147.6–148.0 °C;  **$^1\text{H}$  NMR** (400 MHz,  $\text{CDCl}_3$ ):  $\delta$  7.78 (d,  $J$  = 8.8 Hz, 2H), 7.58 (dd,  $J$  = 8.8, 5.1 Hz, 1H), 7.40–7.30 (m, 3H), 7.29–7.21 (m, 2H), 7.14 (d,  $J$  = 8.9 Hz, 1H), 5.76 (s, 1H), 2.77 (s, 3H);  **$^{13}\text{C}$  NMR** (101 MHz,  $\text{CDCl}_3$ ):  $\delta$  162.7 ( $J$  = 251.3 Hz), 150.7, 139.0, 133.2 ( $J$  = 8.7 Hz), 132.5, 130.9, 128.8, 128.31 ( $J$  = 4.4 Hz), 128.29 ( $J$  = 9.0 Hz), 127.3, 123.8, 123.6, 120.1 ( $J$  = 22.4 Hz), 117.9, 116.5 ( $J$  = 22.6 Hz), 116.2, 34.7;  **$^{19}\text{F}$  NMR** (376 MHz,  $\text{CDCl}_3$ ):  $\delta$  -110.97; **HRMS (ESI)**: calculated for  $\text{C}_{17}\text{H}_{12}\text{N}_2\text{O}_2\text{F}$   $[\text{M}-\text{H}]^-$ : 295.0888, found: 295.0886.

***N*-(4-bromo-2-(2-hydroxynaphthalen-1-yl)phenyl)-*N*-methylnitrous amide (3e)**



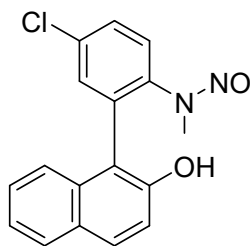

Yellow solid (70.1 mg, 75% yield), *syn:anti* = 10:1 (by  $^1\text{H}$  NMR ). The NMR data listed here represent peak information only for the major *syn* isomer. **Mp**: 152.9–153.3 °C;  $^1\text{H}$  NMR (400 MHz,  $\text{CDCl}_3$ ):  $\delta$  7.81–7.76 (m, 2H), 7.61 (dd,  $J$  = 8.5, 2.3 Hz, 1H), 7.57–7.54 (m,  $J$  = 8.5 Hz, 1H), 7.51 (d,  $J$  = 2.3 Hz, 1H), 7.40–7.29 (m, 2H), 7.26 (dd,  $J$  = 6.7, 2.0 Hz, 1H), 7.14 (d,  $J$  = 8.9 Hz, 1H), 5.52 (s, 1H), 2.77 (s, 3H);  $^{13}\text{C}$  NMR (101 MHz,  $\text{CDCl}_3$ ):  $\delta$  150.7, 141.4, 135.3, 133.2, 132.5, 132.2, 131.0, 129.7, 128.8, 128.3, 127.5, 127.4, 123.9, 123.6, 117.8, 116.1, 34.5; **HRMS (ESI)**: calculated for  $\text{C}_{17}\text{H}_{12}\text{N}_2\text{O}_2\text{Cl}$   $[\text{M}-\text{H}]^-$ : 311.0593, found: 311.0586.

***N*-(4-bromo-2-(2-hydroxynaphthalen-1-yl)phenyl)-*N*-methylnitrosamide (3f)**

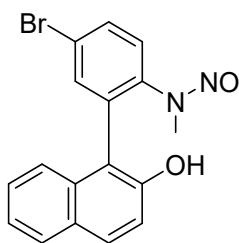

Yellow solid (77.8 mg, 73% yield), *syn:anti* = 10:1 (by  $^1\text{H}$  NMR ). The NMR data listed here represent peak information only for the major *syn* isomer. **Mp**: 145.1–145.5 °C;  $^1\text{H}$  NMR (400 MHz,  $\text{CDCl}_3$ ):  $\delta$  7.85–7.72 (m, 3H), 7.69–7.65 (m, 1H), 7.49 (d,  $J$  = 8.4 Hz, 1H), 7.41–7.30 (m, 2H), 7.28–7.23 (m, 1H), 7.14 (d,  $J$  = 8.9 Hz, 1H), 5.51 (s, 1H), 2.76 (s, 3H);  $^{13}\text{C}$  NMR (101 MHz,  $\text{CDCl}_3$ ):  $\delta$  150.7, 142.0, 136.2, 132.7, 132.6, 132.5, 131.0, 128.9, 128.3, 127.7, 127.4, 123.9, 123.6, 123.2, 117.8, 116.2, 34.3; **HRMS (ESI)**: calculated for  $\text{C}_{17}\text{H}_{12}\text{N}_2\text{O}_2\text{Br}$   $[\text{M}-\text{H}]^-$ : 355.0088, found: 355.0092.

**Methyl 3-(2-hydroxynaphthalen-1-yl)-4-(methyl(nitroso)amino)benzoate (3g)**

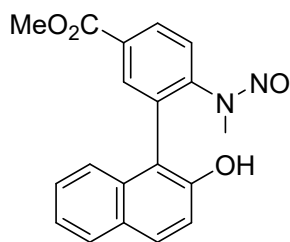

Yellow solid (79.2 mg, 79% yield), *syn:anti* = 13:1 (by  $^1\text{H NMR}$  ). The NMR data listed here represent peak information only for the major *syn* isomer. **Mp**: 113.2–113.5 °C;  $^1\text{H NMR}$  (400 MHz,  $\text{CDCl}_3$ ):  $\delta$  8.28 (d,  $J$  = 8.0 Hz, 1H), 8.21–8.17 (m, 1H), 7.79 (d,  $J$  = 7.9 Hz, 2H), 7.71 (d,  $J$  = 8.1 Hz, 1H), 7.36–7.28 (m, 2H), 7.23–7.19 (m, 1H), 7.14 (d,  $J$  = 8.5 Hz, 1H), 5.61 (s, 1H), 3.93 (s, 3H), 2.78 (s, 3H);  $^{13}\text{C NMR}$  (101 MHz,  $\text{CDCl}_3$ ):  $\delta$  166.0, 150.8, 146.5, 135.0, 132.7, 131.0, 130.8, 130.7, 130.3, 128.9, 128.3, 127.4, 126.0, 123.8, 123.6, 117.8, 116.7, 52.5, 34.1; **HRMS (ESI)**: calculated for  $\text{C}_{19}\text{H}_{15}\text{N}_2\text{O}_4$   $[\text{M}-\text{H}]^-$ : 335.1037, found: 335.1045.

#### ***N*-(2-(2-(2-hydroxynaphthalen-1-yl)-5-methylphenyl)-*N*-methylnitrosamine (3h)**

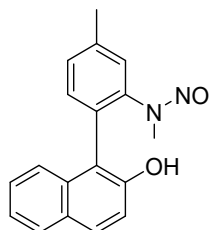

Yellow solid (80.5 mg, 92% yield), *syn:anti* = 12:1 (by  $^1\text{H NMR}$  ). The NMR data listed here represent peak information only for the major *syn* isomer. **Mp**: 152.3–152.8 °C;  $^1\text{H NMR}$  (400 MHz,  $\text{CDCl}_3$ ):  $\delta$  7.76 (d,  $J$  = 8.9 Hz, 2H), 7.48–7.42 (m, 2H), 7.41–7.35 (m, 1H), 7.34–7.28 (m, 2H), 7.28–7.23 (m, 1H), 7.16 (d,  $J$  = 8.9 Hz, 1H), 5.50 (s, 1H), 2.77 (s, 3H), 2.53 (s, 3H);  $^{13}\text{C NMR}$  (101 MHz,  $\text{CDCl}_3$ ):  $\delta$  150.8, 142.6, 140.1, 133.1, 132.9, 130.6, 130.3, 128.8, 128.2, 127.1, 127.0, 126.8, 123.9, 123.6, 117.7, 117.1, 34.5, 21.2; **HRMS (ESI)**: calculated for  $\text{C}_{18}\text{H}_{15}\text{N}_2\text{O}_2$   $[\text{M}-\text{H}]^-$ : 291.1139, found: 291.1134.

#### ***N*-(5-chloro-2-(2-(2-hydroxynaphthalen-1-yl)phenyl)-*N*-methylnitrosamine (3i)**

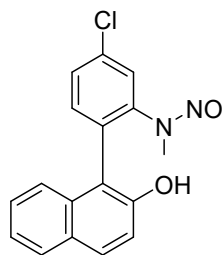

Yellow solid (77.7 mg, 83% yield), *syn:anti* = 12:1 (by  $^1\text{H}$  NMR ). The NMR data listed here represent peak information only for the major *syn* isomer. **Mp**: 126.1–126.6 °C;  $^1\text{H}$  NMR (400 MHz,  $\text{CDCl}_3$ ):  $\delta$  7.79 (d,  $J$  = 8.8 Hz, 2H), 7.66–7.60 (m, 2H), 7.45 (d,  $J$  = 8.1 Hz, 1H), 7.38–7.29 (m, 2H), 7.26–7.21 (m, 1H), 7.14 (d,  $J$  = 8.8 Hz, 1H), 5.44 (s, 1H), 2.77 (s, 3H);  $^{13}\text{C}$  NMR (101 MHz,  $\text{CDCl}_3$ ):  $\delta$  150.7, 143.7, 135.3, 134.5, 132.7, 130.8, 129.7, 128.9, 128.7, 128.3, 127.3, 126.6, 123.8, 123.6, 117.8, 116.3, 34.2; **HRMS (ESI)**: calculated for  $\text{C}_{17}\text{H}_{12}\text{N}_2\text{O}_2\text{Cl}$   $[\text{M}-\text{H}]^-$ : 311.0593, found: 311.0590.

***N*-(2-(2-hydroxynaphthalen-1-yl)-6-methylphenyl)-*N*-methylnitrosamide (3j)**

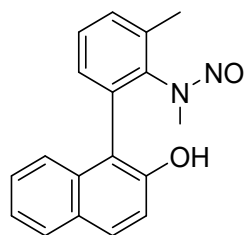

Yellow solid (78.1 mg, 89% yield), *syn:anti* > 20:1 (by  $^1\text{H}$  NMR ). The NMR data listed here represent peak information only for the major *syn* isomer. **Mp**: 147.2–147.4 °C;  $^1\text{H}$  NMR (400 MHz,  $\text{CDCl}_3$ ):  $\delta$  7.75 (d,  $J$  = 8.8 Hz, 2H), 7.61–7.50 (m, 2H), 7.36–7.27 (m, 3H), 7.23–7.18 (m, 1H), 7.15 (d,  $J$  = 8.9 Hz, 1H), 5.38 (s, 1H), 2.80 (s, 3H), 2.29 (s, 3H);  $^{13}\text{C}$  NMR (101 MHz,  $\text{CDCl}_3$ ):  $\delta$  150.7, 141.6, 136.9, 133.0, 132.9, 131.8, 130.8, 130.3, 128.7, 128.1, 126.7, 124.1, 123.5, 117.9, 117.3, 34.5, 18.3; **HRMS (ESI)**: calculated for  $\text{C}_{18}\text{H}_{17}\text{N}_2\text{O}_2$   $[\text{M}+\text{H}]^+$ : 293.1285, found: 293.1285

***N*-(2-(2-hydroxynaphthalen-1-yl)phenyl)-*N*-isopropylnitrosamide (3k)**

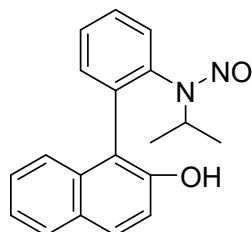

Yellow solid (83.9 mg, 91% yield), *syn:anti* = 3:1 (by  $^1\text{H}$  NMR ). **Mp**: 132.6–132.9 °C;  $^1\text{H}$  NMR

(400 MHz, CDCl<sub>3</sub>) (*syn* and *anti* isomers):  $\delta$  7.83–7.74 (m, 3H), 7.67–7.57 (m, 3H), 7.53–7.46 (m, 3H), 7.37–7.28 (m, 2H), 7.22–7.18 (m, 1H), 7.17–7.11 (m, 2H), 5.68 (s, 0.34H), 5.48 (s, 1H), 4.46 (dt,  $J = 13.6, 6.8$  Hz, 0.34H), 3.84 (dt,  $J = 12.9, 6.2$  Hz, 1H), 1.31 (d,  $J = 5.9$  Hz, 3H), 0.94 (d,  $J = 6.2$  Hz, 3H), 0.91 (d,  $J = 6.8$  Hz, 1H), 0.63 (d,  $J = 6.8$  Hz, 1H); <sup>13</sup>C NMR (101 MHz, CDCl<sub>3</sub>) (*syn* and *anti* isomers):  $\delta$  152.5, 151.2, 140.7, 140.4, 134.2, 134.1, 133.4, 133.3, 133.2, 132.8, 130.4, 130.1, 129.8, 129.4, 129.2, 129.0, 128.7, 128.6, 128.3, 128.1, 126.7, 126.6, 124.5, 123.7, 123.5, 123.4, 118.9, 118.7, 118.3, 116.7, 57.9, 50.1, 22.9, 21.2, 19.2, 18.5; **HRMS (ESI)**: calculated for C<sub>19</sub>H<sub>17</sub>N<sub>2</sub>O<sub>2</sub> [M–H]<sup>–</sup>: 305.1296, found: 305.1292.

### *N*-benzyl-*N*-(2-(2-hydroxynaphthalen-1-yl)phenyl)nitrous amide (3l)

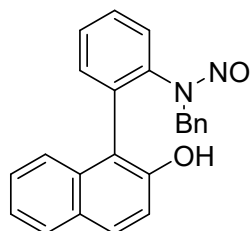

Yellow solid (86.6 mg, 82% yield), *syn:anti* = 12:1 (by <sup>1</sup>H NMR ). The NMR data listed here represent peak information only for the major *syn* isomer. **Mp**: 144.5–145.0 °C; <sup>1</sup>H NMR (400 MHz, CDCl<sub>3</sub>):  $\delta$  7.81–7.76 (m, 2H), 7.61 (t,  $J = 7.4$  Hz, 1H), 7.56–7.48 (m, 2H), 7.37–7.30 (m, 3H), 7.28–7.25 (m, 1H), 7.21–7.17 (m, 1H), 7.14–7.09 (m, 3H), 6.83 (d,  $J = 6.3$  Hz, 2H), 5.37 (s, 1H), 4.71 (d,  $J = 14.7$  Hz, 1H), 4.30 (d,  $J = 14.6$  Hz, 1H); <sup>13</sup>C NMR (101 MHz, CDCl<sub>3</sub>):  $\delta$  150.8, 141.5, 134.1, 133.6, 132.9, 131.1, 130.6, 130.0, 129.6, 129.0, 128.8, 128.7, 128.5, 128.4, 128.3, 128.2, 127.5, 127.0, 124.1, 123.7, 118.0, 117.2, 48.7; **HRMS (ESI)**: calculated for C<sub>23</sub>H<sub>17</sub>N<sub>2</sub>O<sub>2</sub> [M–H]<sup>–</sup>: 353.1296, found: 353.1295.

### *N*-(2-(2-hydroxy-6-methoxynaphthalen-1-yl)phenyl)-*N*-methylnitrous amide (3ab)

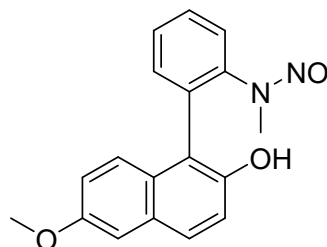

Yellow solid (77.7 mg, 84% yield), *syn:anti* = 10:1 (by <sup>1</sup>H NMR ). The NMR data listed here represent peak information only for the major *syn* isomer. **Mp**: 139.5–139.8 °C; <sup>1</sup>H NMR (400

MHz, CDCl<sub>3</sub>):  $\delta$  7.67 (d,  $J$  = 8.9 Hz, 1H), 7.64–7.59 (m, 3H), 7.52–7.48 (m, 1H), 7.16–7.11 (m, 2H), 7.10 (d,  $J$  = 2.4 Hz, 1H), 7.03–6.97 (m, 1H), 5.35 (s, 1H), 3.87 (s, 3H), 2.79 (s, 3H); <sup>13</sup>C NMR (101 MHz, CDCl<sub>3</sub>):  $\delta$  156.0, 149.1, 142.8, 133.3, 130.4, 129.8, 129.6(8), 129.6(6), 129.1, 128.0, 126.5, 125.4, 119.5, 118.2, 117.5, 106.6, 55.3, 34.5; **HRMS (ESI)**: calculated for C<sub>18</sub>H<sub>15</sub>N<sub>2</sub>O<sub>3</sub> [M–H]<sup>–</sup>: 307.1088, found: 307.1089.

***N*-(2-(6-bromo-2-hydroxynaphthalen-1-yl)phenyl)-*N*-methylnitrous amide (3ac)**

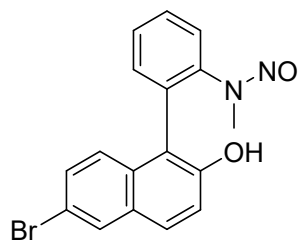

Yellow solid (101.1 mg, 94% yield), *syn:anti* = 10:1 (by <sup>1</sup>H NMR ). The NMR data listed here represent peak information only for the major *syn* isomer. **Mp**: 161.7–162.3 °C; **<sup>1</sup>H NMR** (400 MHz, CDCl<sub>3</sub>):  $\delta$  7.94–7.91 (m, 1H), 7.71–7.63 (m, 3H), 7.63–7.59 (m, 1H), 7.51–7.46 (m, 1H), 7.38 (dd,  $J$  = 9.0, 1.9 Hz, 1H), 7.18 (d,  $J$  = 8.9 Hz, 1H), 7.11 (d,  $J$  = 9.0 Hz, 1H), 5.57 (s, 1H), 2.81 (s, 3H); <sup>13</sup>C NMR (101 MHz, CDCl<sub>3</sub>):  $\delta$  151.1, 142.8, 133.3, 131.4, 130.3, 130.2, 130.0, 129.9(3), 129.8(7), 129.7, 129.5, 126.6, 125.7, 119.0, 117.5, 117.4, 34.5; **HRMS (ESI)**: calculated for C<sub>17</sub>H<sub>12</sub>N<sub>2</sub>O<sub>2</sub>Br [M–H]<sup>–</sup>: 355.0088, found: 355.0090

**Methyl 6-hydroxy-5-(2-(methyl(nitroso)amino)phenyl)-2-naphthoate (3ad)**

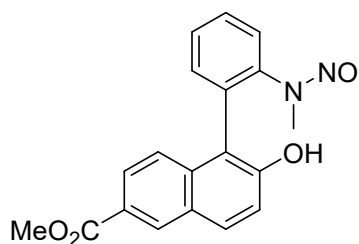

Yellow solid (96.5 mg, 96% yield), *syn:anti* = 10:1 (by <sup>1</sup>H NMR ). The NMR data listed here represent peak information only for the major *syn* isomer. **Mp**: 154.1–154.4 °C; **<sup>1</sup>H NMR** (400 MHz, CDCl<sub>3</sub>):  $\delta$  8.53 (d,  $J$  = 1.4 Hz, 1H), 7.91–7.85 (m, 2H), 7.67–7.63 (m, 2H), 7.63–7.58 (m, 1H), 7.53–7.47 (m, 1H), 7.28 (d,  $J$  = 8.9 Hz, 1H), 7.22 (d,  $J$  = 8.9 Hz, 1H), 6.14 (s, 1H), 3.94 (s, 3H), 2.82 (s, 3H); <sup>13</sup>C NMR (101 MHz, CDCl<sub>3</sub>):  $\delta$  167.2, 153.0, 142.8, 135.3, 133.3, 131.9, 131.4, 129.9(3), 129.8(9), 129.8(1), 127.7(6), 126.5, 126.4, 125.1, 124.1, 118.7, 117.5, 52.2, 34.5; **HRMS (ESI)**: calculated for C<sub>19</sub>H<sub>15</sub>N<sub>2</sub>O<sub>4</sub> [M–H]<sup>–</sup>: 335.1037, found: 335.1028.

***N*-(2-(2-hydroxy-6-phenylnaphthalen-1-yl)phenyl)-*N*-methylnitrous amide (3ae)**

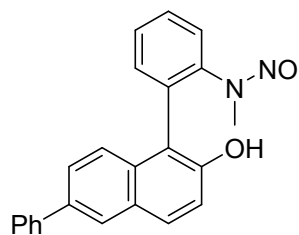

Yellow solid (96.1 mg, 90% yield), *syn:anti* = 10:1 (by  $^1\text{H}$  NMR ). The NMR data listed here represent peak information only for the major *syn* isomer. **Mp:** 159.1–160.0 °C;  **$^1\text{H}$  NMR** (400 MHz,  $\text{CDCl}_3$ ):  $\delta$  7.99–7.94 (m, 1H), 7.82 (d,  $J$  = 8.9 Hz, 1H), 7.68–7.63 (m, 5H), 7.61–7.57 (m, 1H), 7.55–7.51 (m, 1H), 7.47–7.42 (m, 2H), 7.37–7.29 (m, 2H), 7.18 (d,  $J$  = 8.9 Hz, 1H), 5.52 (s, 1H), 2.84 (s, 3H);  **$^{13}\text{C}$  NMR** (101 MHz,  $\text{CDCl}_3$ ):  $\delta$  150.8, 142.9, 140.7, 136.4, 133.4, 132.0, 130.8, 130.1, 129.8(0), 129.7(8), 129.1, 128.8, 127.2(1), 127.1(6), 126.7, 126.5, 126.1, 124.5, 118.2, 117.2, 34.6; **HRMS (ESI):** calculated for  $\text{C}_{23}\text{H}_{17}\text{N}_2\text{O}_2$   $[\text{M}-\text{H}]^-$ : 353.1296, found: 353.1290.

***N*-(2-(2-hydroxy-7-methoxynaphthalen-1-yl)phenyl)-*N*-methylnitrous amide (3af)**

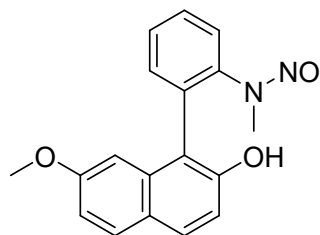

Yellow solid (80.5 mg, 87% yield), *syn:anti* = 10:1 (by  $^1\text{H}$  NMR ). The NMR data listed here represent peak information only for the major *syn* isomer. **Mp:** 159.1–159.8 °C;  **$^1\text{H}$  NMR** (400 MHz,  $\text{CDCl}_3$ ):  $\delta$  7.73–7.65 (m, 2H), 7.66–7.62 (m, 3H), 7.54–7.49 (m, 1H), 7.01 (d,  $J$  = 8.8 Hz, 1H), 6.96 (d,  $J$  = 8.8 Hz, 1H), 6.50 (s, 1H), 5.44 (s, 1H), 3.65 (s, 3H), 2.78 (s, 3H);  **$^{13}\text{C}$  NMR** (101 MHz,  $\text{CDCl}_3$ ):  $\delta$  158.7, 151.2, 142.9, 134.0, 133.3, 130.3, 130.2, 129.8, 129.7, 129.7, 126.7, 124.2, 116.4, 115.8, 115.1, 103.1, 55.1, 34.4; **HRMS (ESI):** calculated for  $\text{C}_{18}\text{H}_{15}\text{N}_2\text{O}_3$   $[\text{M}-\text{H}]^-$ : 307.1088, found: 307.1085.

***N*-(2-(7-bromo-2-hydroxynaphthalen-1-yl)phenyl)-*N*-methylnitrous amide (3ag)**

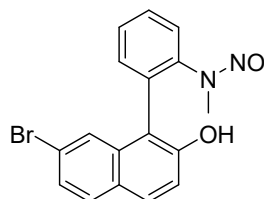

Yellow solid (99.9 mg, 93% yield), *syn:anti* = 10:1 (by  $^1\text{H}$  NMR ). The NMR data listed here

represent peak information only for the major *syn* isomer. **Mp**: 151.9–152.3 °C; **<sup>1</sup>H NMR** (400 MHz, CDCl<sub>3</sub>): δ 7.72 (d, *J* = 8.9 Hz, 1H), 7.69–7.59 (m, 4H), 7.52–7.46 (m, 1H), 7.43–7.36 (m, 2H), 7.15 (d, *J* = 8.9 Hz, 1H), 5.76 (s, 1H), 2.86 (s, 3H); **<sup>13</sup>C NMR** (101 MHz, CDCl<sub>3</sub>): δ 151.7, 142.7, 134.1, 133.4, 130.4, 130.0, 129.9, 129.7, 127.2, 127.0, 126.5, 125.9, 121.6, 118.3, 116.5, 34.6; **HRMS (ESI)**: calculated for C<sub>17</sub>H<sub>12</sub>N<sub>2</sub>O<sub>2</sub>Br [M–H]<sup>–</sup>: 355.0088, found: 355.0088.

***N*-(2-(2,7-dihydroxynaphthalen-1-yl)phenyl)-*N*-methylnitrous amide (3ah)**

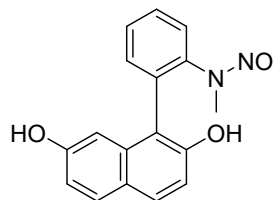

Yellow solid (75.3 mg, 85% yield), *syn:anti* = 10:1 (by <sup>1</sup>H NMR ). The NMR data listed here represent peak information only for the major *syn* isomer. **Mp**: 111.2–111.5 °C; **<sup>1</sup>H NMR** (400 MHz, CDCl<sub>3</sub>): δ 7.74–7.66 (m, 2H), 7.66–7.61 (m, 3H), 7.53–7.48 (m, 1H), 7.00 (d, *J* = 8.8 Hz, 1H), 6.91 (dd, *J* = 8.8, 2.4 Hz, 1H), 6.52 (d, *J* = 2.3 Hz, 1H), 5.31 (s, 1H), 5.22 (s, 1H), 2.80 (s, 3H); **<sup>13</sup>C NMR** (101 MHz, CDCl<sub>3</sub>): δ 154.9, 151.3, 142.8, 134.3, 133.4, 130.4, 130.3, 130.2, 129.9, 129.7, 126.6, 124.2, 115.9, 115.5, 115.1, 106.3, 34.6; **HRMS (ESI)**: calculated for C<sub>17</sub>H<sub>13</sub>N<sub>2</sub>O<sub>3</sub> [M–H]<sup>–</sup>: 293.0932, found: 293.0926.

**Methyl 3-hydroxy-4-(2-(methyl(nitroso)amino)phenyl)-2-naphthoate (3ai)**

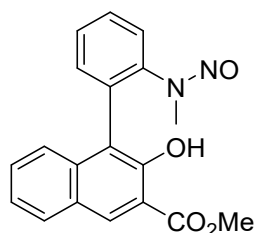

Yellow solid (92.2 mg, 91% yield), *syn:anti* > 20:1 (by <sup>1</sup>H NMR ). The NMR data listed here represent peak information only for the major *syn* isomer. **Mp**: 126.3–126.5 °C; **<sup>1</sup>H NMR** (400 MHz, CDCl<sub>3</sub>): δ 10.76 (s, 1H), 8.55 (s, 1H), 7.84–7.79 (m, 1H), 7.64–7.55 (m, 3H), 7.50–7.45 (m, 1H), 7.44–7.38 (m, 1H), 7.35–7.29 (m, 2H), 4.03 (s, 3H), 2.92 (s, 3H); **<sup>13</sup>C NMR** (101 MHz, CDCl<sub>3</sub>): δ 170.3, 152.9, 142.5, 136.3, 133.1, 133.0, 131.0, 129.9, 129.6, 129.0(3), 128.9(5), 126.8, 125.7, 124.3, 124.2, 119.7, 113.6, 52.8, 34.4; **HRMS (ESI)**: calculated for C<sub>19</sub>H<sub>15</sub>N<sub>2</sub>O<sub>4</sub> [M–H]<sup>–</sup>: 335.1037, found: 335.1034.

***N*-(2-(4-bromo-2-hydroxynaphthalen-1-yl)phenyl)-*N*-methylnitrous amide (3aj)**

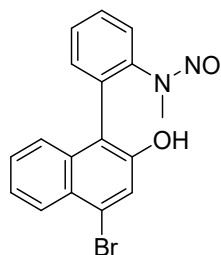

Yellow solid (98.4 mg, 92% yield), *syn:anti* = 8:1 (by  $^1\text{H}$  NMR ). The NMR data listed here represent peak information only for the major *syn* isomer. **Mp:** 142.7–143.1 °C;  **$^1\text{H}$  NMR** (400 MHz,  $\text{CDCl}_3$ ):  $\delta$  8.18 (d,  $J$  = 8.4 Hz, 1H), 7.70–7.61 (m, 3H), 7.56 (s, 1H), 7.48 (dd,  $J$  = 7.1, 1.8 Hz, 1H), 7.44–7.34 (m, 2H), 7.22 (d,  $J$  = 8.1 Hz, 1H), 5.37 (s, 1H), 2.84 (s, 3H);  **$^{13}\text{C}$  NMR** (101 MHz,  $\text{CDCl}_3$ ):  $\delta$  150.6, 142.7, 133.5, 133.3, 129.9, 129.8, 127.8, 127.5, 127.4(4), 127.4(1), 126.4, 124.9, 124.4, 124.3, 122.0, 117.5, 34.7; **HRMS (ESI):** calculated for  $\text{C}_{17}\text{H}_{12}\text{N}_2\text{O}_2\text{Br}$   $[\text{M}-\text{H}]^-$ : 355.0088, found: 355.0086.

***N*-(3',5'-dibromo-4'-hydroxy-[1,1'-biphenyl]-2-yl)-*N*-methylnitrous amide (3ak)**

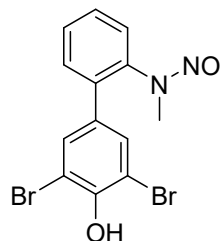

Yellow solid (98.4 mg, 42% yield), *syn:anti* = 10:1 (by  $^1\text{H}$  NMR ). The NMR data listed here represent peak information only for the major *syn* isomer. **Mp:** 149.2–149.7 °C;  **$^1\text{H}$  NMR** (400 MHz,  $\text{CDCl}_3$ ):  $\delta$  7.56–7.49 (m, 2H), 7.47–7.43 (m, 2H), 7.41–7.36 (m, 2H), 6.02 (s, 1H), 3.01 (s, 3H);  **$^{13}\text{C}$  NMR** (101 MHz,  $\text{CDCl}_3$ ):  $\delta$  149.2, 140.3, 134.2, 132.9, 132.1, 131.5, 131.2, 129.5, 129.2, 127.3, 126.7, 110.2, 35.6; **HRMS (ESI):** calculated for  $\text{C}_{13}\text{H}_{10}\text{N}_2\text{O}_2\text{Br}_2\text{Na}$   $[\text{M}+\text{Na}]^+$ : 406.9001, found: 406.8999.

***N*-(2-(2-methoxynaphthalen-1-yl)phenyl)-*N*-methylnitrous amide (4)**

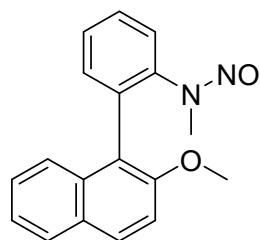



Yellow solid (143.2 mg, 98% yield), *syn:anti* > 20:1 (by  $^1\text{H}$  NMR ). The NMR data listed here represent peak information only for the major *syn* isomer. **Mp**: 150.1–150.6 °C;  **$^1\text{H}$  NMR** (400 MHz,  $\text{CDCl}_3$ ):  $\delta$  7.88 (d,  $J = 9.1$  Hz, 1H), 7.79 (dd,  $J = 6.5, 2.8$  Hz, 1H), 7.60–7.55 (m,  $J = 2.9$  Hz, 3H), 7.46–7.41 (m, 1H), 7.40–7.36 (m, 1H), 7.35–7.30 (m, 2H), 7.28 (d,  $J = 9.1$  Hz, 1H), 3.77 (s, 3H), 2.74 (s, 3H);  **$^{13}\text{C}$  NMR** (101 MHz,  $\text{CDCl}_3$ ):  $\delta$  153.7, 142.6, 133.0, 132.9, 131.7, 130.3, 128.8, 128.7, 128.6, 128.1, 127.1, 125.7, 124.3, 123.8, 120.4, 112.7, 56.2, 34.4; **HRMS (ESI)**: calculated for  $\text{C}_{18}\text{H}_{16}\text{N}_2\text{O}_2\text{K}$   $[\text{M}+\text{K}]^+$ : 331.0843, found: 331.0832.

### 2-(2-Methoxynaphthalen-1-yl)-*N*-methylaniline (5)

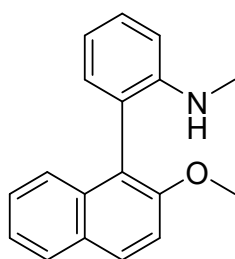

Yellow oil (65.0 mg, 82% yield);  **$^1\text{H}$  NMR** (400 MHz,  $\text{CDCl}_3$ ):  $\delta$  7.89 (d,  $J = 9.0$  Hz, 1H), 7.84–7.79 (m, 1H), 7.42–7.30 (m, 5H), 7.05 (dd,  $J = 7.4, 1.5$  Hz, 1H), 6.84 (m, 1H), 6.79 (d,  $J = 8.1$  Hz, 1H), 3.83 (s, 3H), 2.71 (s, 3H);  **$^{13}\text{C}$  NMR** (101 MHz,  $\text{CDCl}_3$ ):  $\delta$  154.7, 147.4, 133.6, 131.3, 129.6, 129.3, 128.8, 127.9, 126.6, 125.1, 123.8, 121.5, 121.4, 116.8, 114.1, 109.9, 56.9, 30.9; **HRMS (ESI)**: calculated for  $\text{C}_{18}\text{H}_{18}\text{NO}$   $[\text{M}+\text{H}]^+$ : 264.1383, found: 264.1391.

### 1-(2-(Methyl(nitroso)amino)phenyl)naphthalen-2-yl trifluoromethanesulfonate (6)

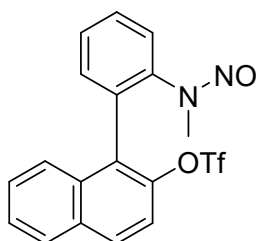

Yellow oil (170.2 mg, 83% yield), *syn:anti* > 20:1 (by  $^1\text{H}$  NMR ).  **$^1\text{H}$  NMR** (400 MHz,  $\text{CDCl}_3$ ):  $\delta$  7.94 (d,  $J = 9.1$  Hz, 1H), 7.90 (d,  $J = 8.1$  Hz, 1H), 7.71–7.65 (m,  $J = 7.6, 1.6$  Hz, 1H), 7.65–7.58 (m, 2H), 7.58–7.52 (m, 3H), 7.52–7.47 (m, 1H), 7.40 (d,  $J = 9.1$  Hz, 1H), 2.98 (s, 3H);  **$^{13}\text{C}$  NMR** (101 MHz,  $\text{CDCl}_3$ ):  $\delta$  143.8, 142.1, 133.3, 132.9, 132.6, 131.0, 130.2, 128.6, 128.5, 128.4, 128.3, 128.0, 127.2, 126.2, 125.2, 119.0, 118.3 ( $J = 320.3$  Hz), 34.1;  **$^{19}\text{F}$  NMR** (376 MHz,  $\text{CDCl}_3$ ):  $\delta$  -74.32. **HRMS (ESI)**: calculated for  $\text{C}_{18}\text{H}_{13}\text{F}_3\text{N}_2\text{O}_4\text{SNa}$   $[\text{M}+\text{Na}]^+$ : 433.0440, found: 433.0436.

**Methyl (E)-3-((1-(2-(methyl(nitroso)amino)phenyl)naphthalen-2-yl)oxy)acrylate (7)**

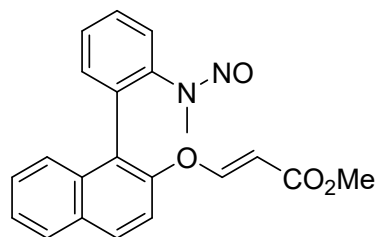

Yellow oil (98.5 mg, 91% yield), *syn:anti* > 20:1 (by  $^1\text{H NMR}$ ).  $^1\text{H NMR}$  (400 MHz,  $\text{CDCl}_3$ ):  $\delta$  7.92 (d,  $J = 9.0$  Hz, 1H), 7.87–7.83 (m, 1H), 7.65 (d,  $J = 12.3$  Hz, 1H), 7.62–7.58 (m, 1H), 7.58–7.53 (m, 2H), 7.48–7.39 (m, 4H), 7.29–7.25 (m, 1H), 5.32 (d,  $J = 12.3$  Hz, 1H), 3.67 (s, 3H), 2.84 (s, 3H);  $^{13}\text{C NMR}$  (101 MHz,  $\text{CDCl}_3$ ):  $\delta$  167.3, 159.4, 149.5, 142.3, 132.7, 132.6, 131.2, 130.8, 129.9, 129.4, 128.7, 128.2, 127.6, 125.9, 125.5, 125.4, 125.0, 118.1, 101.8, 51.3, 34.5; **HRMS (ESI)**: calculated for  $\text{C}_{21}\text{H}_{18}\text{N}_2\text{O}_4\text{Na}$   $[\text{M}+\text{Na}]^+$ : 385.1159, found: 385.1155.

***N*-(2-(2-(allyloxy)naphthalen-1-yl)phenyl)-*N*-methylnitrous amide (8)**

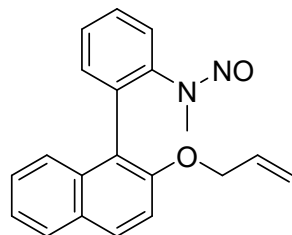

Yellow oil (60.0 mg, 94% yield), *syn:anti* > 20:1 (by  $^1\text{H NMR}$ ).  $^1\text{H NMR}$  (400 MHz,  $\text{CDCl}_3$ ):  $\delta$  7.84 (d,  $J = 9.1$  Hz, 1H), 7.80–7.75 (m, 1H), 7.60–7.52 (m, 3H), 7.46–7.41 (m, 1H), 7.41–7.35 (m, 1H), 7.35–7.29 (m, 2H), 7.25 (d,  $J = 9.0$  Hz, 1H), 5.92–5.79 (m, 1H), 5.22–5.09 (m, 2H), 4.60–4.47 (m, 2H), 2.76 (s, 3H);  $^{13}\text{C NMR}$  (101 MHz,  $\text{CDCl}_3$ ):  $\delta$  152.8, 142.6, 133.1, 133.0, 131.7, 130.1, 128.9, 128.6, 128.5, 128.0, 127.0, 125.5, 124.5, 123.9, 121.1, 117.0, 114.2, 69.6, 34.4; **HRMS (ESI)**: calculated for  $\text{C}_{20}\text{H}_{18}\text{N}_2\text{O}_2\text{Na}$   $[\text{M}+\text{Na}]^+$ : 341.1261, found: 341.1265.

## 7. X-ray structure of 3a

The structure of **3a** was determined by single crystal X-ray analysis (ellipsoid contour at 50% probability). **CCDC 2290351** contains the supplementary crystallographic data for this structure.

These data can be obtained free of charge from The Cambridge Crystallographic Data Centre.

### Experimental

Single crystals of **3a** ( $C_{17}H_{14}N_2O_2$ ) were grown by slow evaporation in petroleum ether/ $CH_2Cl_2$  = 1/1 under an air atmosphere. A suitable crystal was selected and mounted on a XtaLAB Synergy R, DW system, HyPix diffractometer. The crystal was kept at 100.00(10) K during data collection. Using Olex2, the structure was solved with the SHELXS structure solution program using Direct Methods and refined with the SHELXL refinement package using Least Squares minimisation.

### Crystal structure determination of 3a

Crystal Data for  $C_{17}H_{14}N_2O_2$  ( $M = 278.30$  g/mol): monoclinic, space group  $P2_1/c$  (no. 14),  $a = 11.3559(4)$  Å,  $b = 8.1137(2)$  Å,  $c = 16.0334(4)$  Å,  $\beta = 101.324(3)^\circ$ ,  $V = 1448.52(7)$  Å<sup>3</sup>,  $Z = 4$ ,  $T = 100.00(10)$  K,  $\mu(\text{Cu K}\alpha) = 0.688$  mm<sup>-1</sup>,  $D_{\text{calc}} = 1.276$  g/cm<sup>3</sup>, 8568 reflections measured ( $7.94^\circ \leq 2\theta \leq 151.188^\circ$ ), 2857 unique ( $R_{\text{int}} = 0.0272$ ,  $R_{\text{sigma}} = 0.0291$ ) which were used in all calculations. The final  $R_1$  was 0.0429 ( $I > 2\sigma(I)$ ) and  $wR_2$  was 0.1226 (all data).

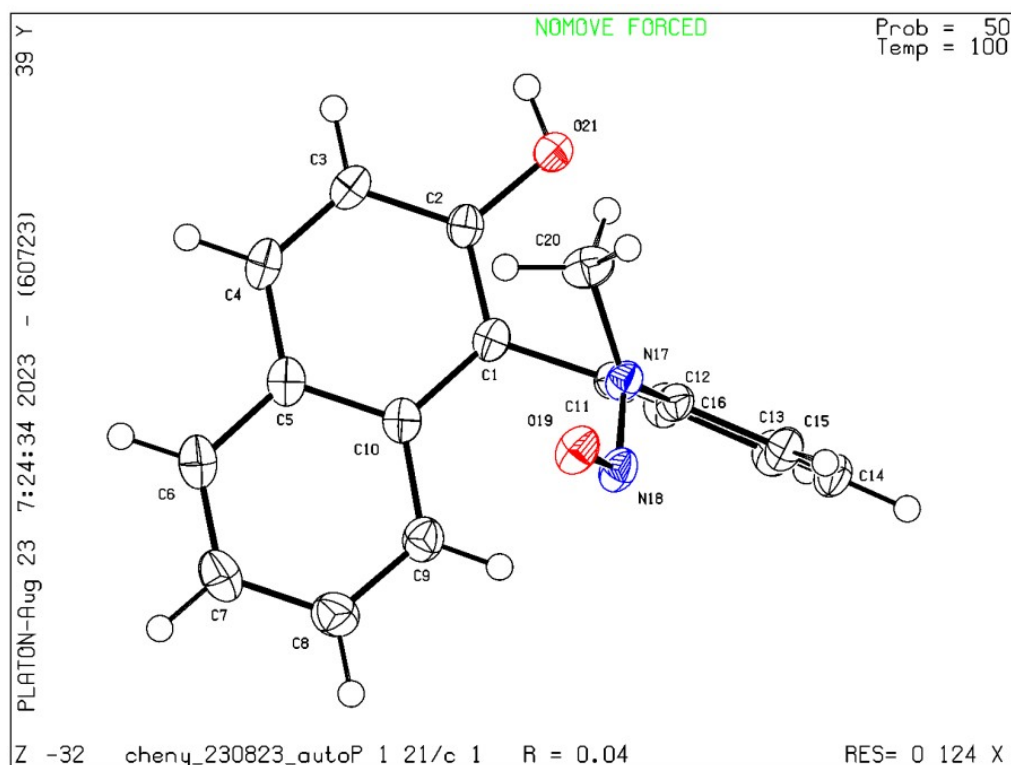

## 8. References

- [1] T. Ohwada, M. Miura, H. Tanaka, S. Sakamoto, K. Yamaguchi, H. Ikeda and S. Inagaki, *J. Am. Chem. Soc.*, **2001**, *123*, 10164–10172.
- [2] S. Pan, S. Kundu and R. Samanta, *Org. Lett.*, **2023**, *25*, 2873–2877.
- [3] K. Wu, B. Cao, C. Y. Zhou and C. M. Che, *Chem. Asian J.*, **2018**, *24*, 4815–4819.
- [4] P. Chaudhary, R. Korde, S. Gupta, P. Sureshababu, S. Sabiah and J. Kandasamy, *Adv. Synth. Catal.*, **2018**, *360*, 556–561.

## 9. NMR spectra of products

### <sup>1</sup>H NMR (400 MHz) Spectrum of 3a in CDCl<sub>3</sub>

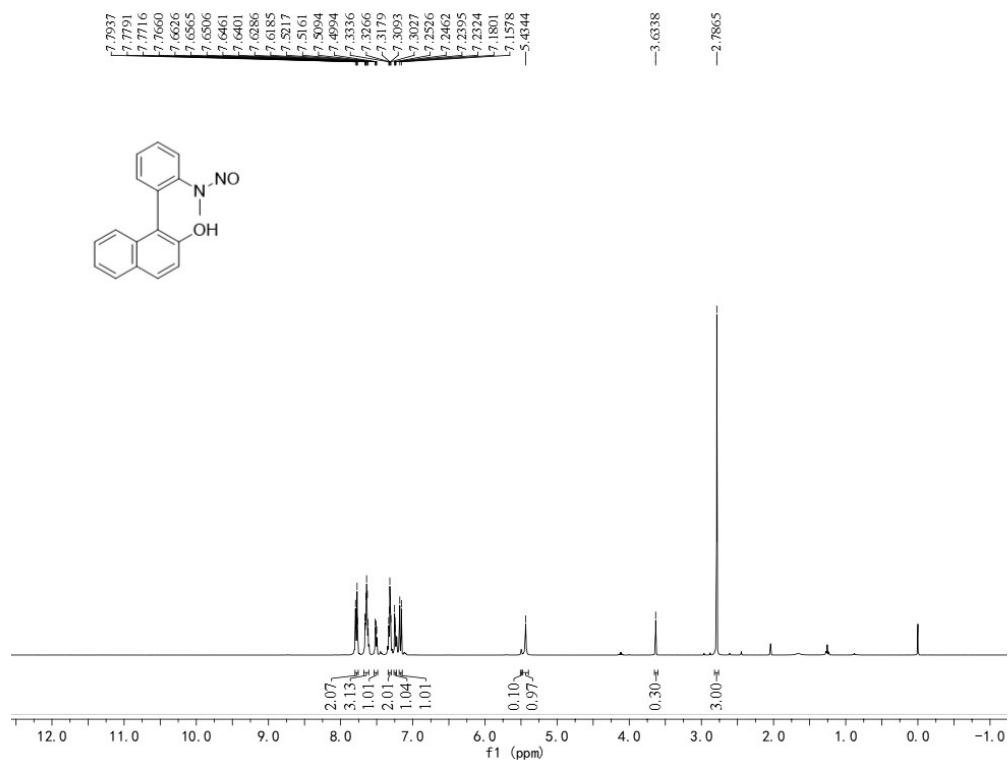

### <sup>13</sup>C NMR (101 MHz) Spectrum of 3a in CDCl<sub>3</sub>

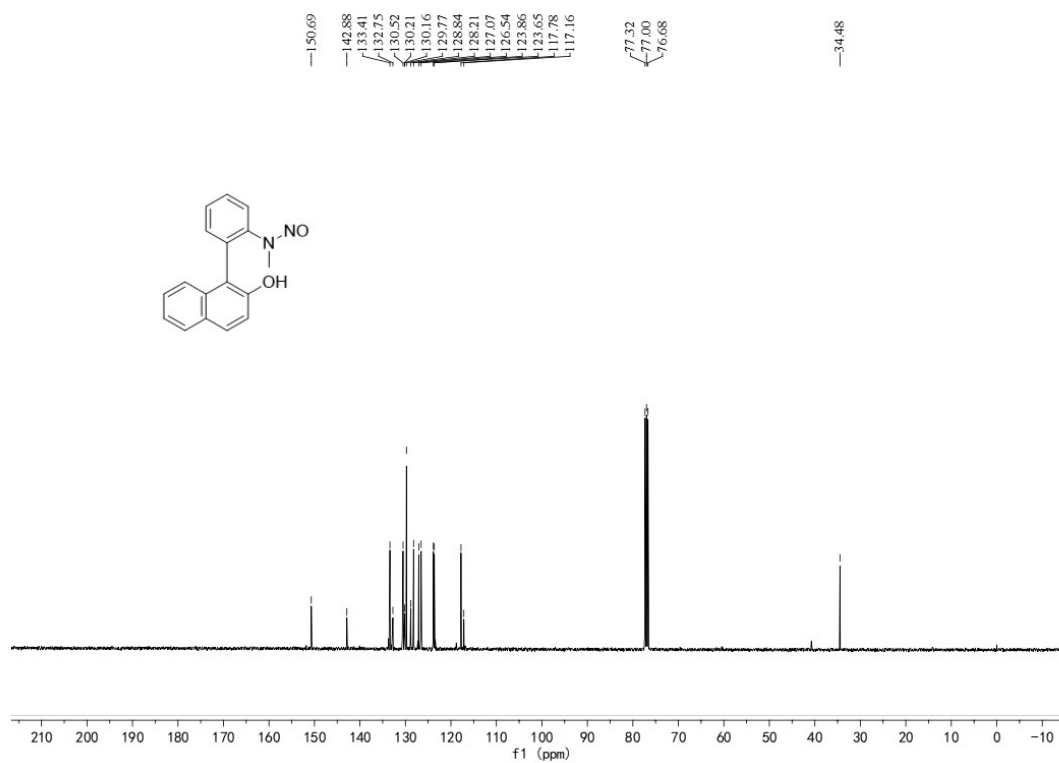

### <sup>1</sup>H NMR (400 MHz) Spectrum of 3b in CDCl<sub>3</sub>

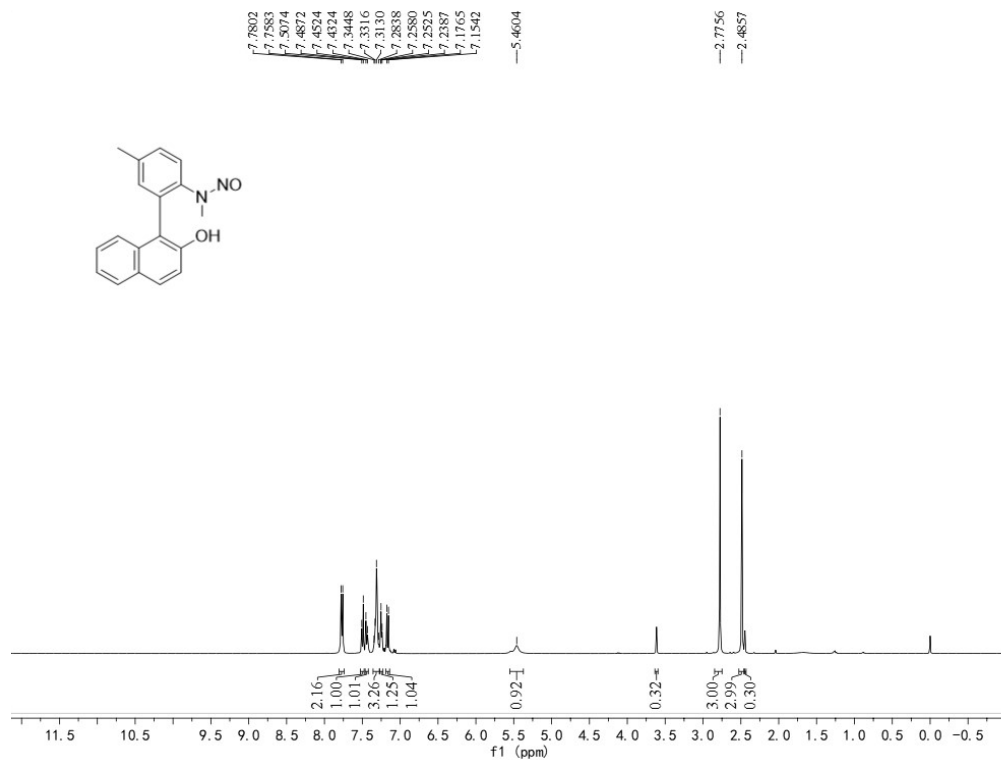

### <sup>13</sup>C NMR (101 MHz) Spectrum of 3b in CDCl<sub>3</sub>

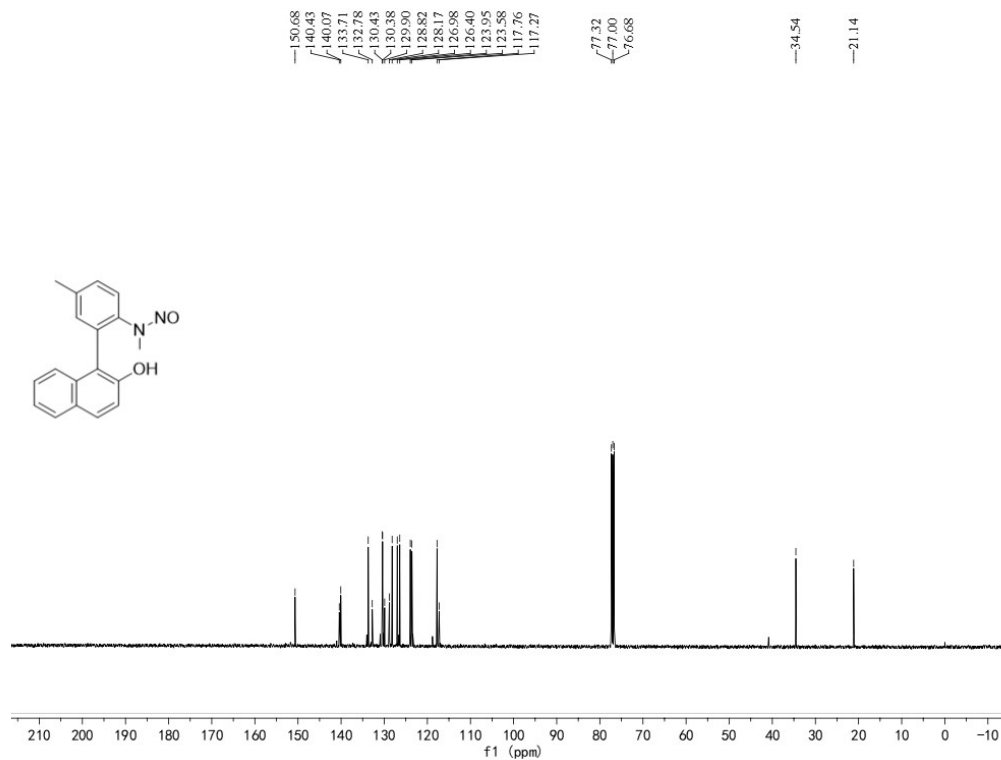

### <sup>1</sup>H NMR (400 MHz) Spectrum of 3c in CDCl<sub>3</sub>

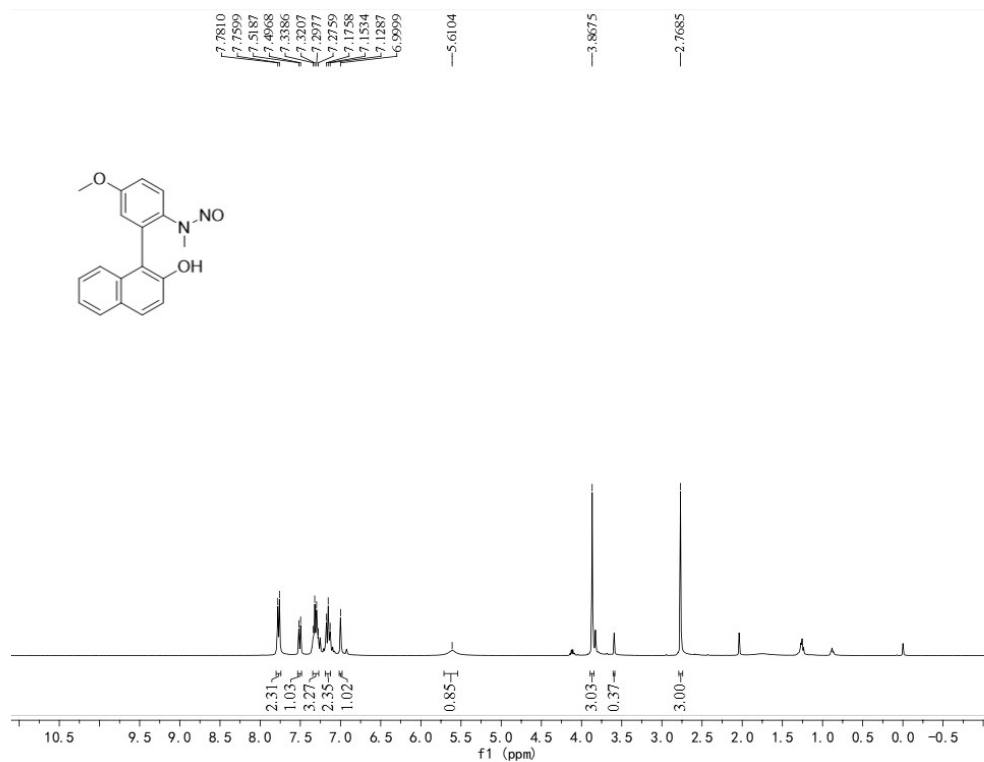

### <sup>13</sup>C NMR (101 MHz) Spectrum of 3c in CDCl<sub>3</sub>

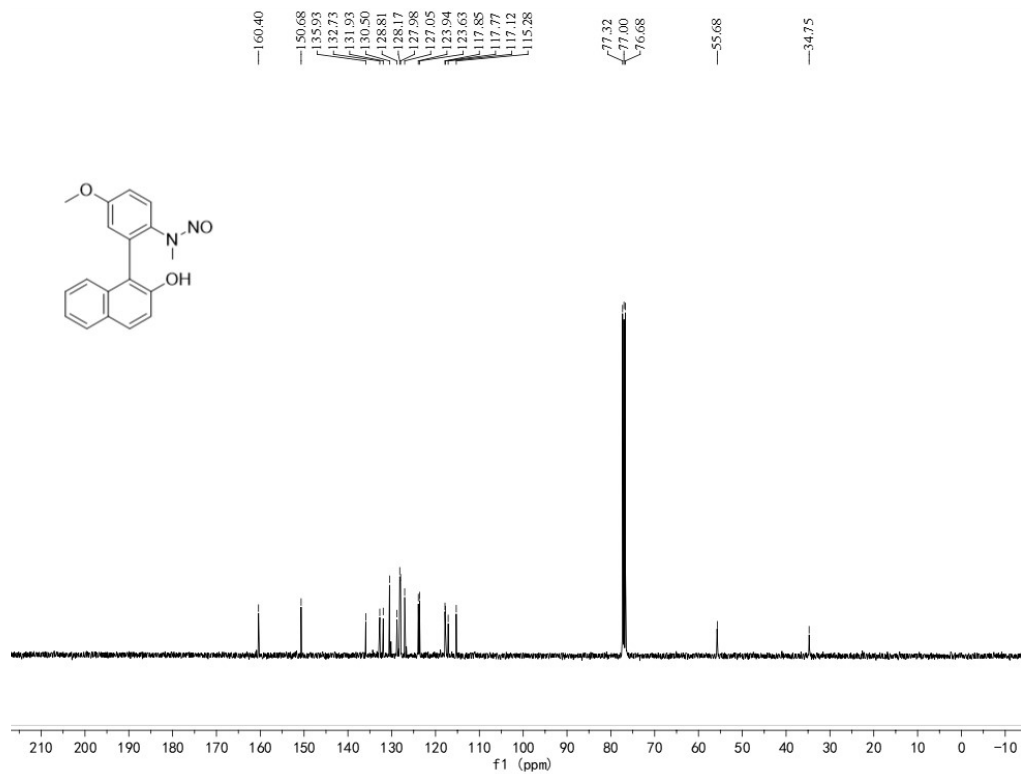

### <sup>1</sup>H NMR (400 MHz) Spectrum of 3d in CDCl<sub>3</sub>

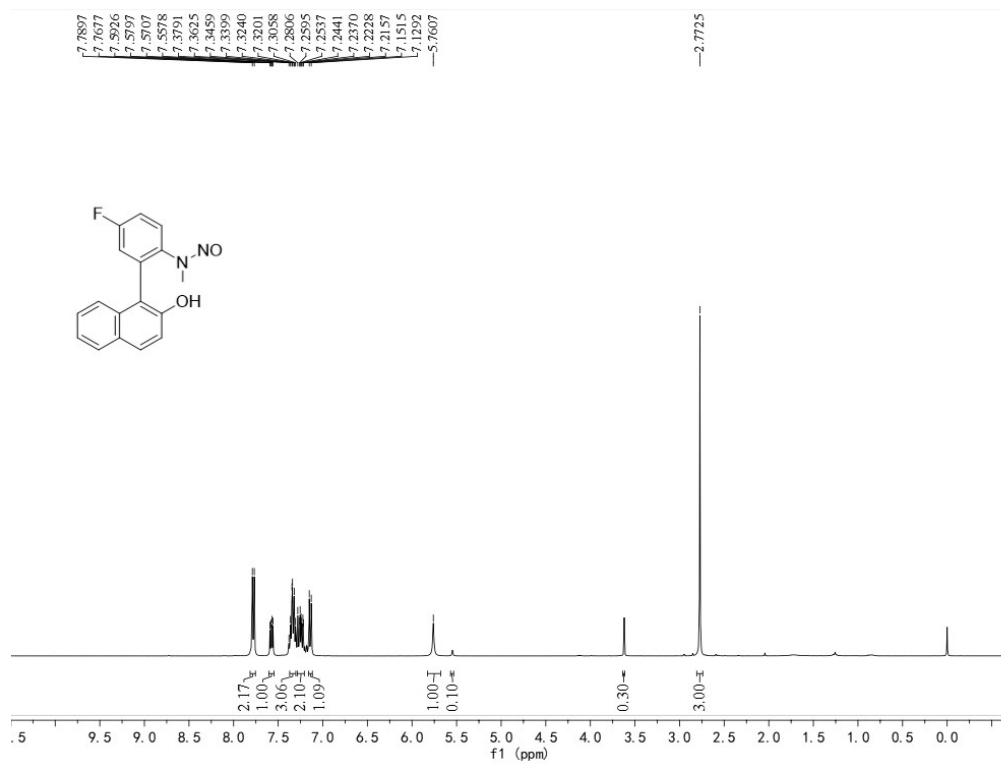

### <sup>13</sup>C NMR (101 MHz) Spectrum of 3d in CDCl<sub>3</sub>

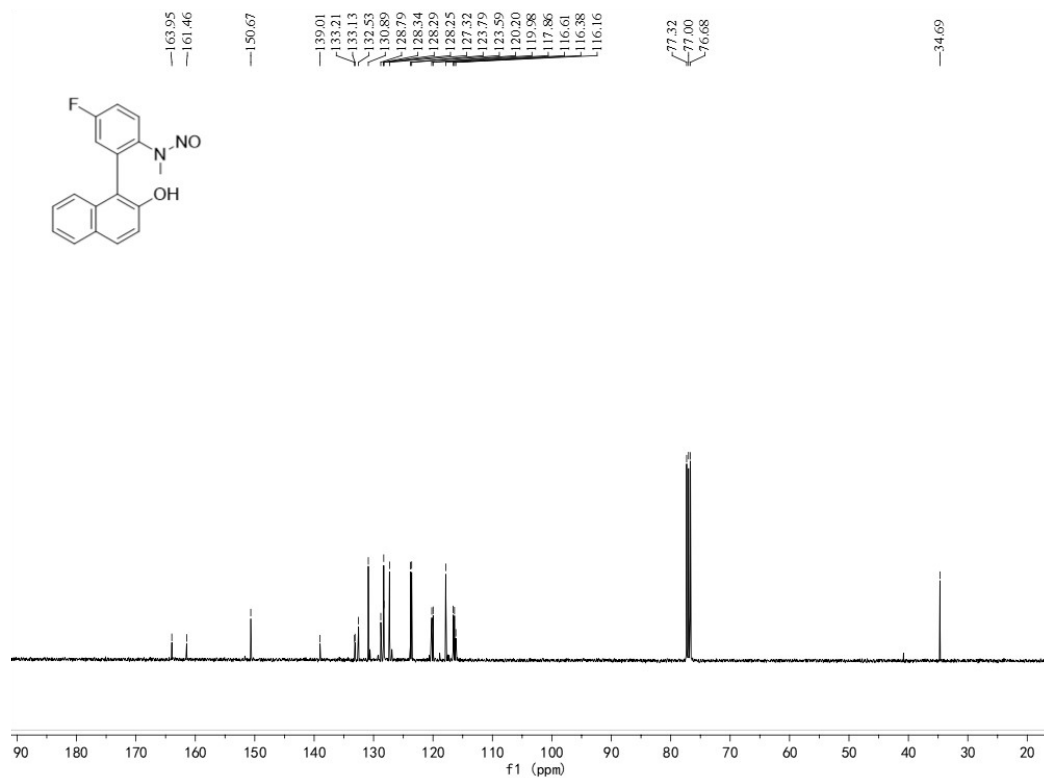



### <sup>19</sup>F NMR (376 MHz) Spectrum of 3d in CDCl<sub>3</sub>

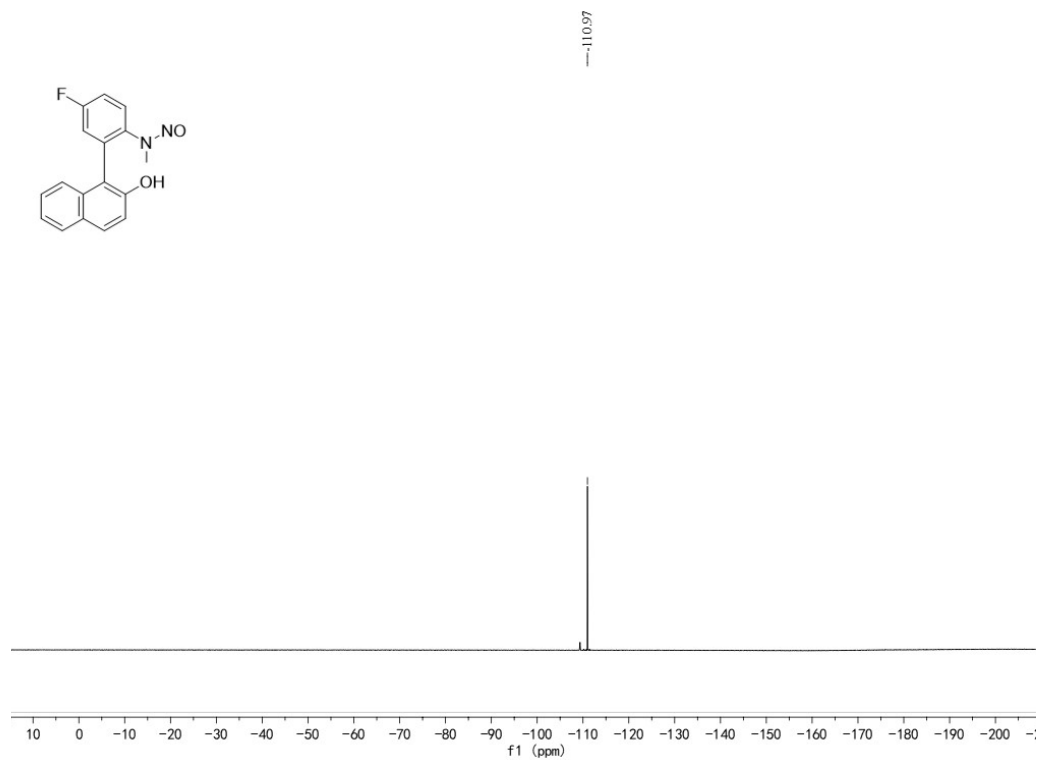

### <sup>1</sup>H NMR (400 MHz) Spectrum of 3e in CDCl<sub>3</sub>

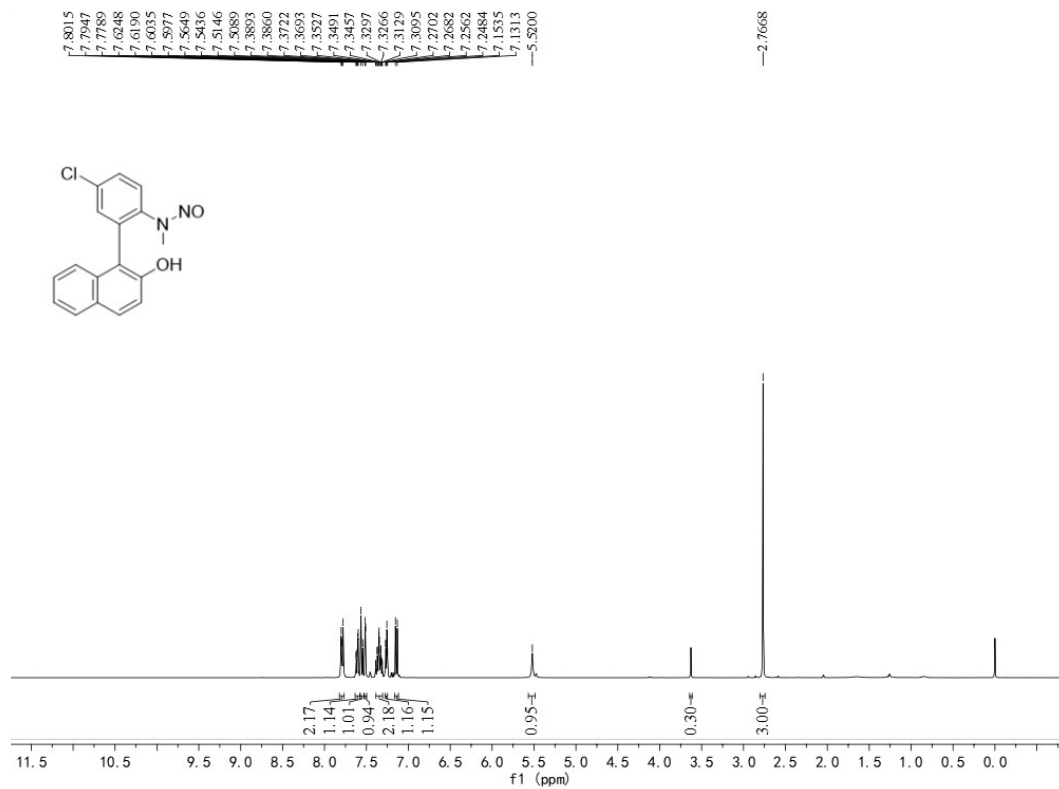

**<sup>13</sup>C NMR (101 MHz) Spectrum of 3e in CDCl<sub>3</sub>**

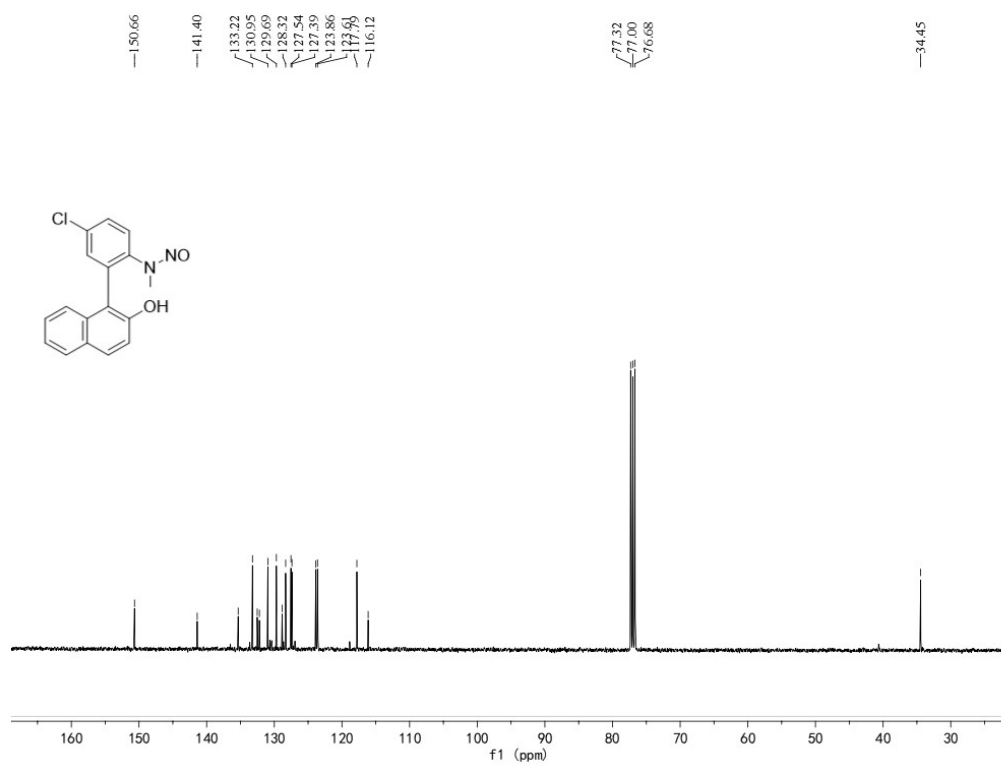

### <sup>1</sup>H NMR (400 MHz) Spectrum of 3f in CDCl<sub>3</sub>

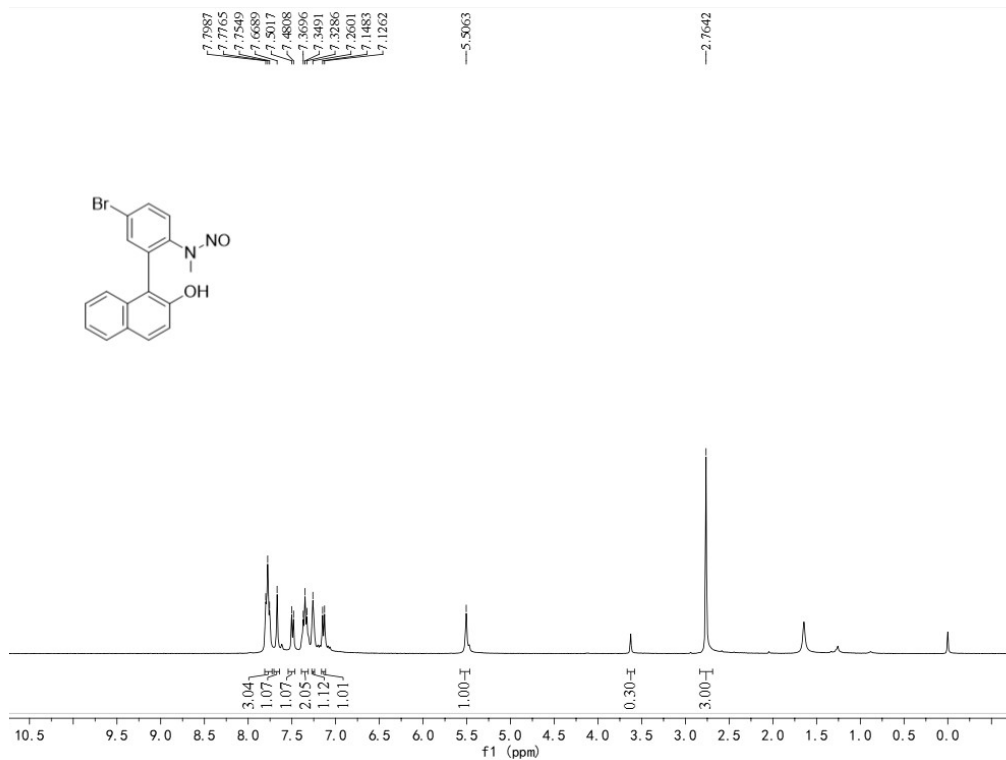

### <sup>13</sup>C NMR (101 MHz) Spectrum of 3f in CDCl<sub>3</sub>

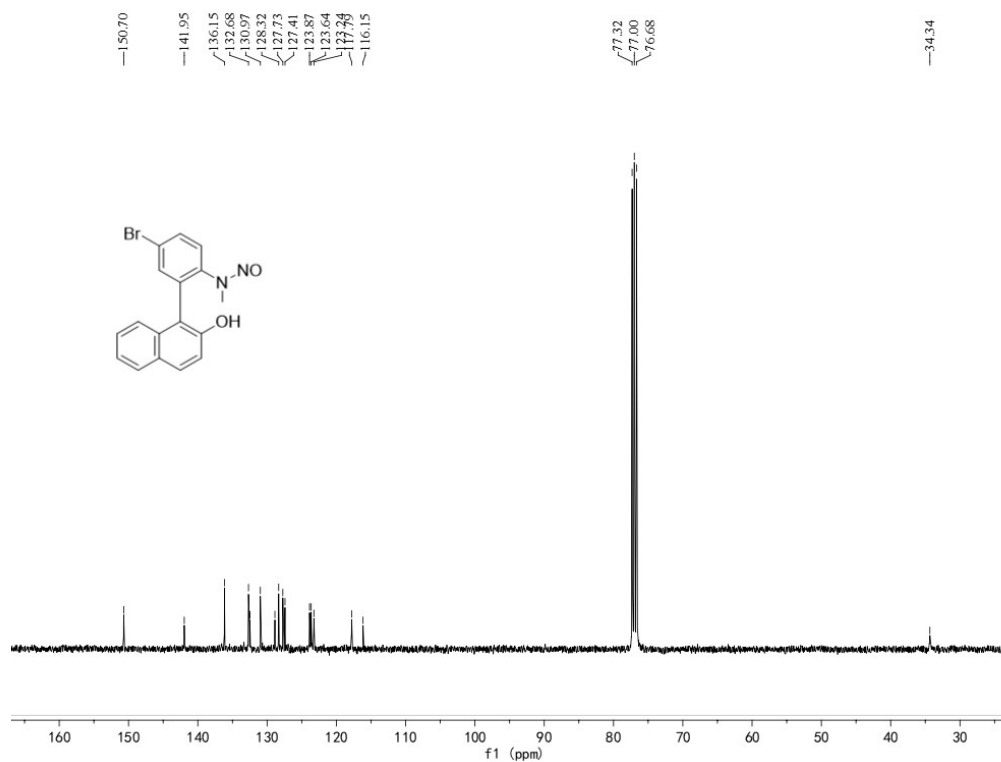

### <sup>1</sup>H NMR (400 MHz) Spectrum of 3g in CDCl<sub>3</sub>

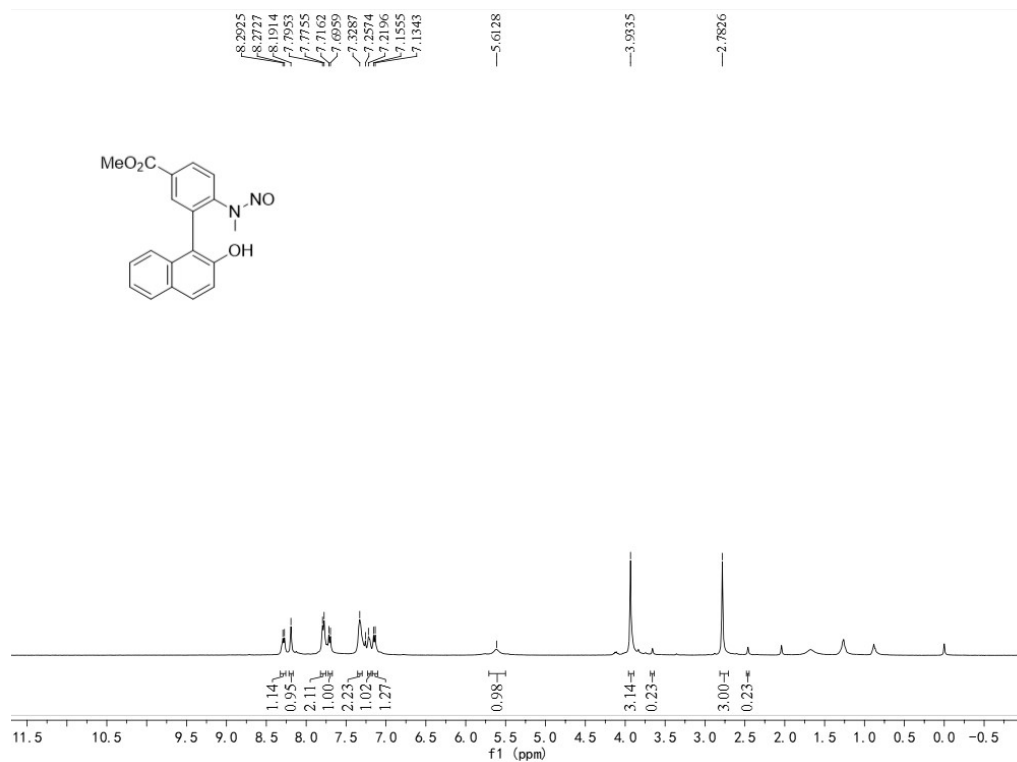

### <sup>13</sup>C NMR (101 MHz) Spectrum of 3g in CDCl<sub>3</sub>

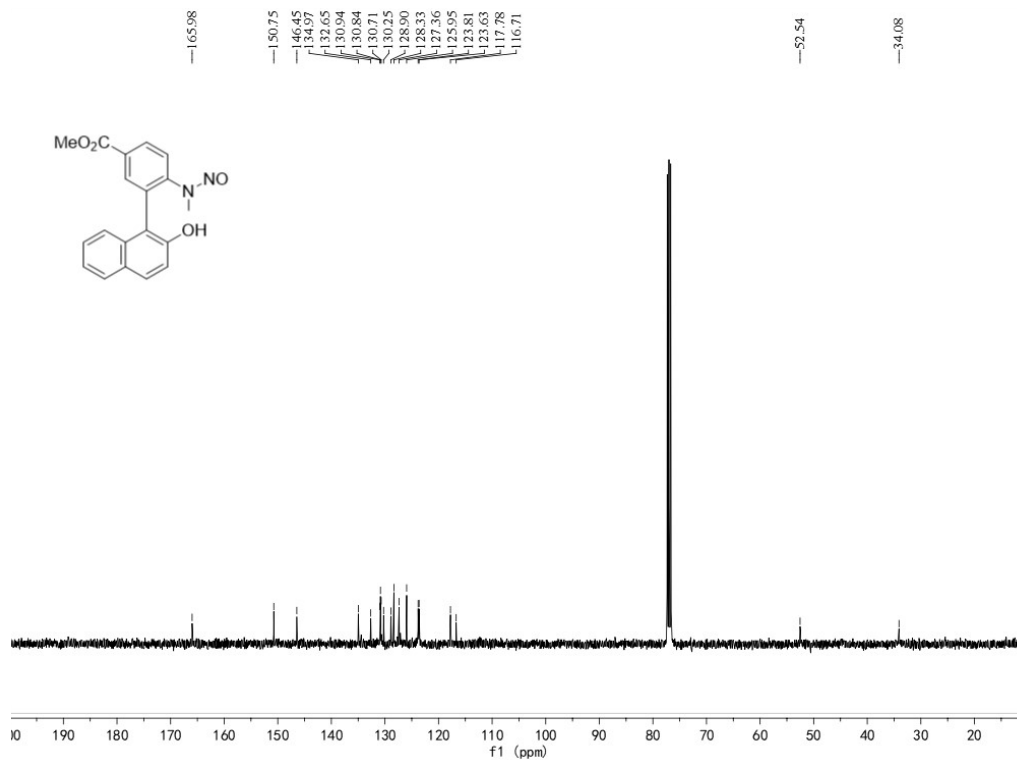

### <sup>1</sup>H NMR (400 MHz) Spectrum of 3h in CDCl<sub>3</sub>

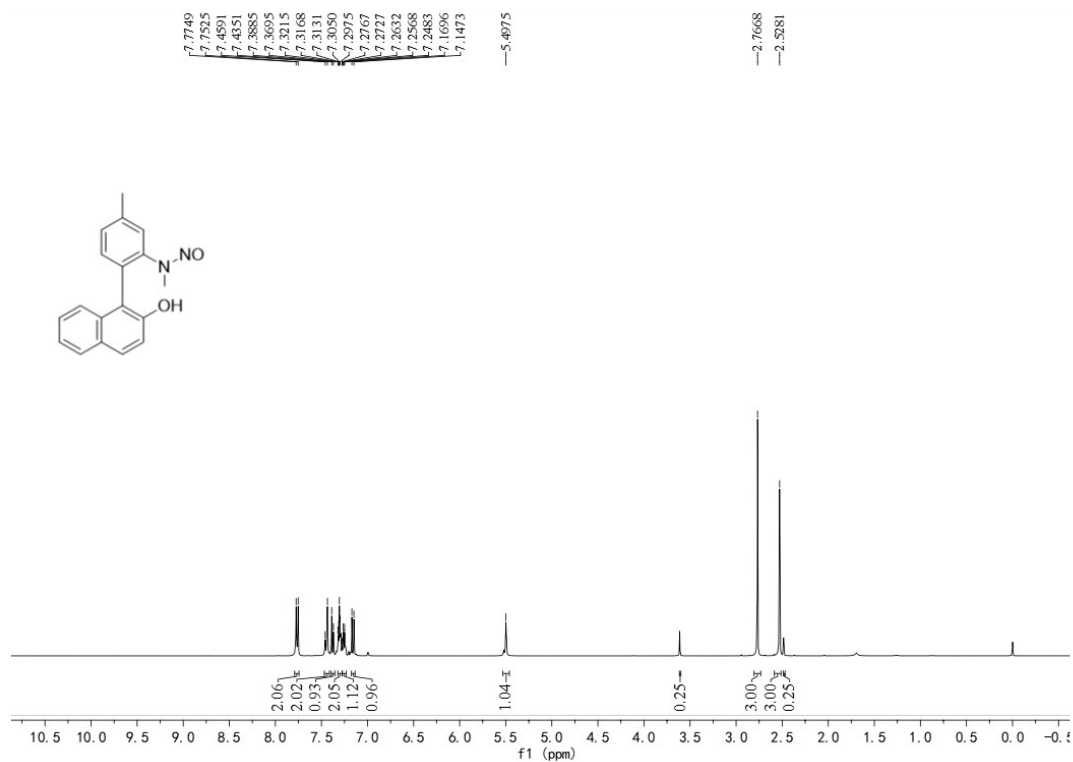

### <sup>13</sup>C NMR (101 MHz) Spectrum of 3h in CDCl<sub>3</sub>

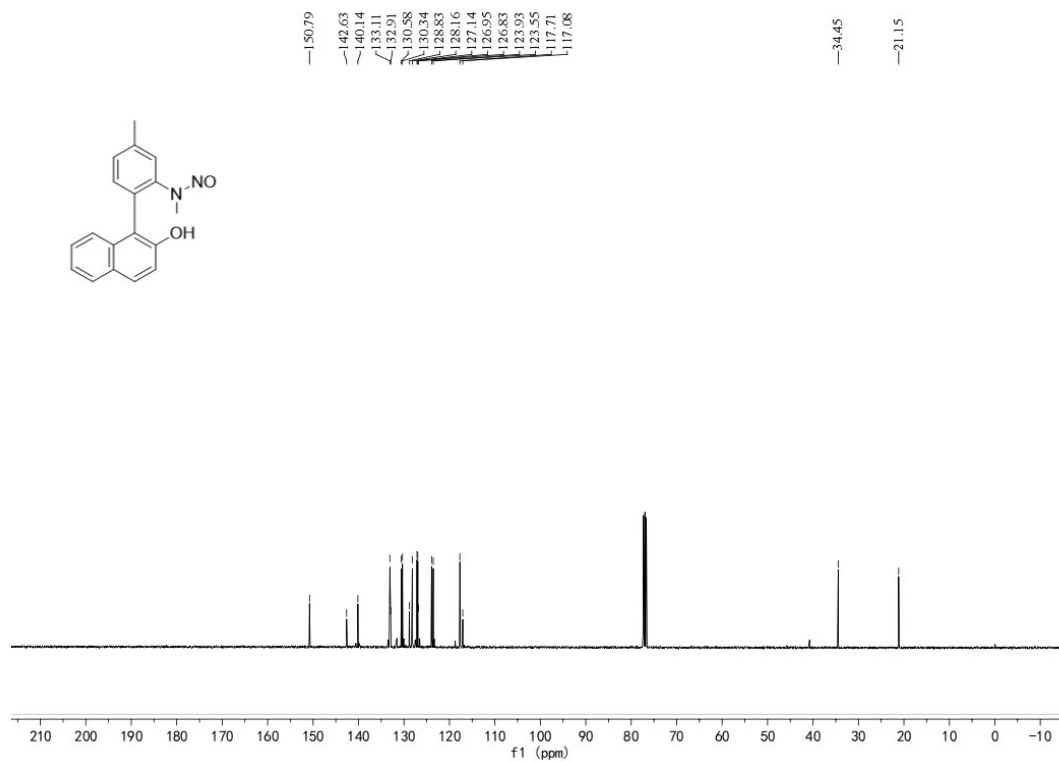

### <sup>1</sup>H NMR (400 MHz) Spectrum of 3i in CDCl<sub>3</sub>

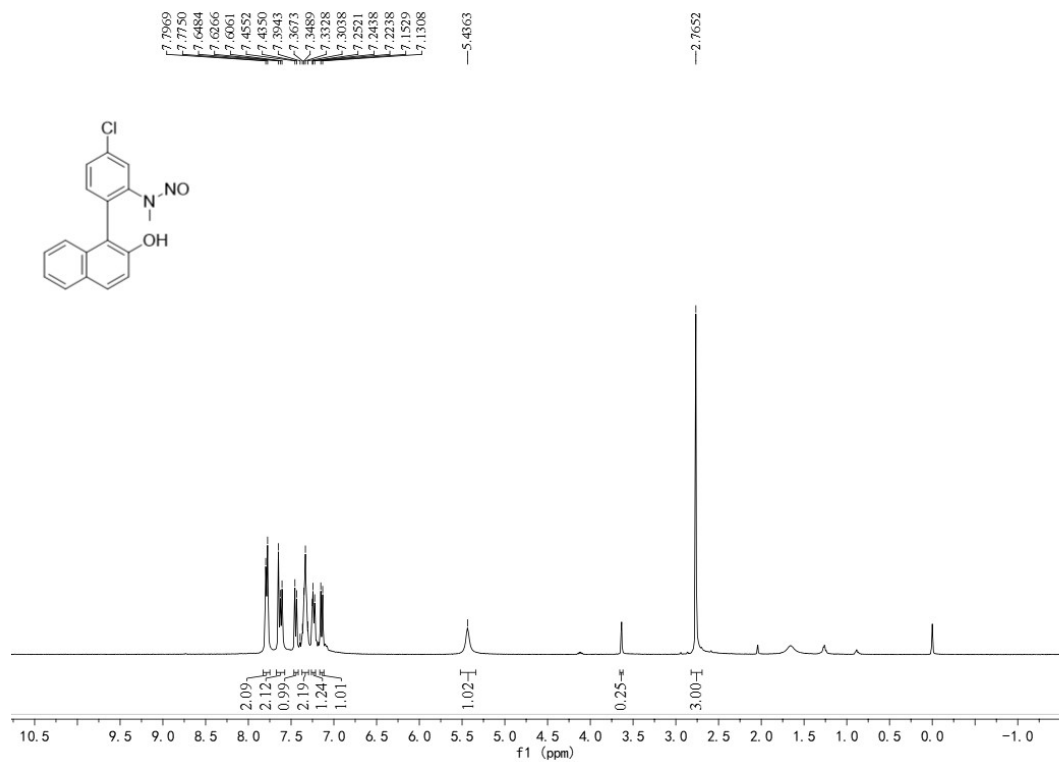

### <sup>13</sup>C NMR (101 MHz) Spectrum of 3i in CDCl<sub>3</sub>

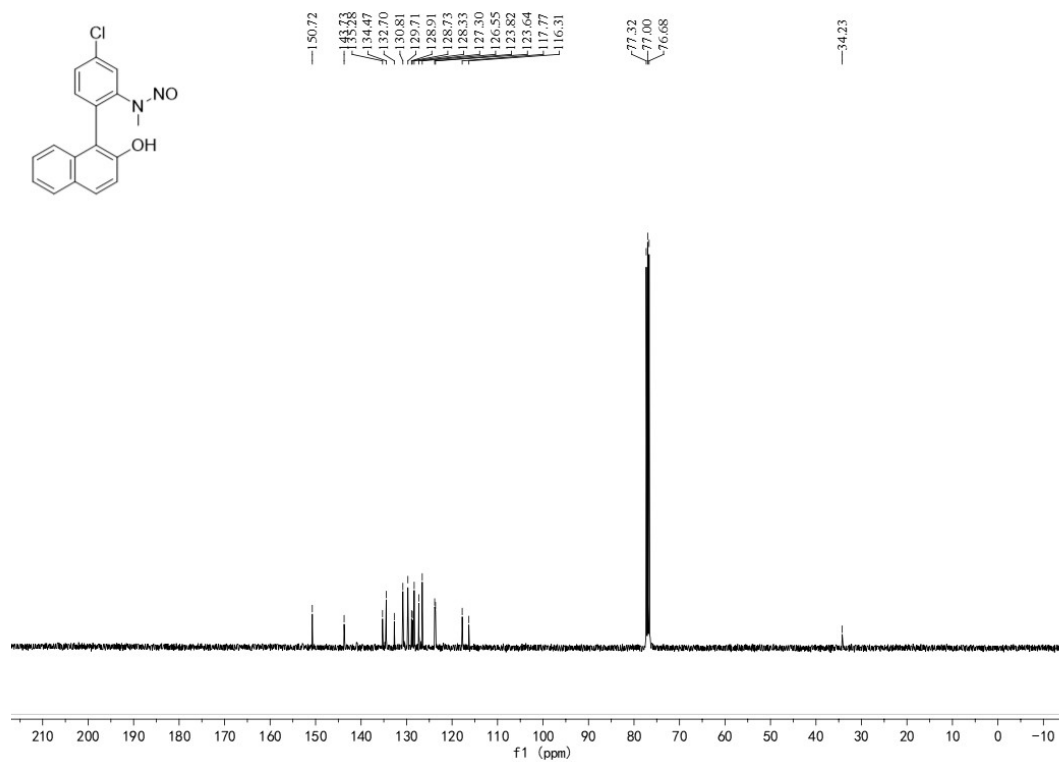

### <sup>1</sup>H NMR (400 MHz) Spectrum of 3j in CDCl<sub>3</sub>

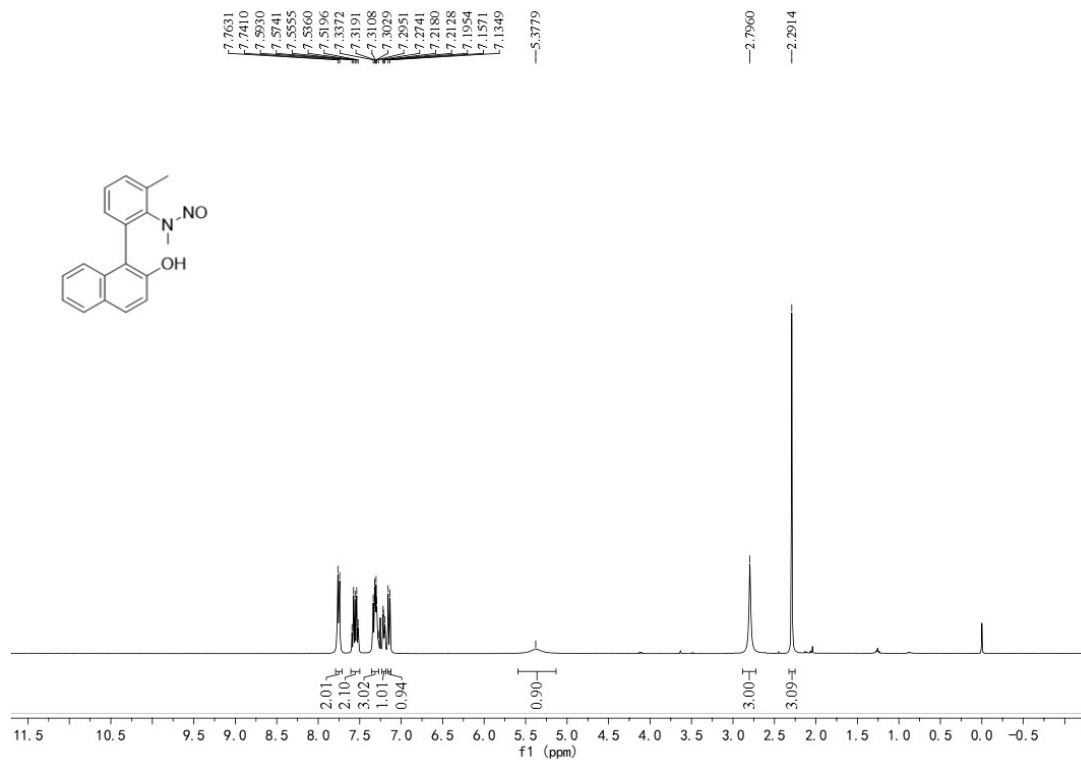

13

### <sup>13</sup>C NMR (101 MHz) Spectrum of 3j in CDCl<sub>3</sub>

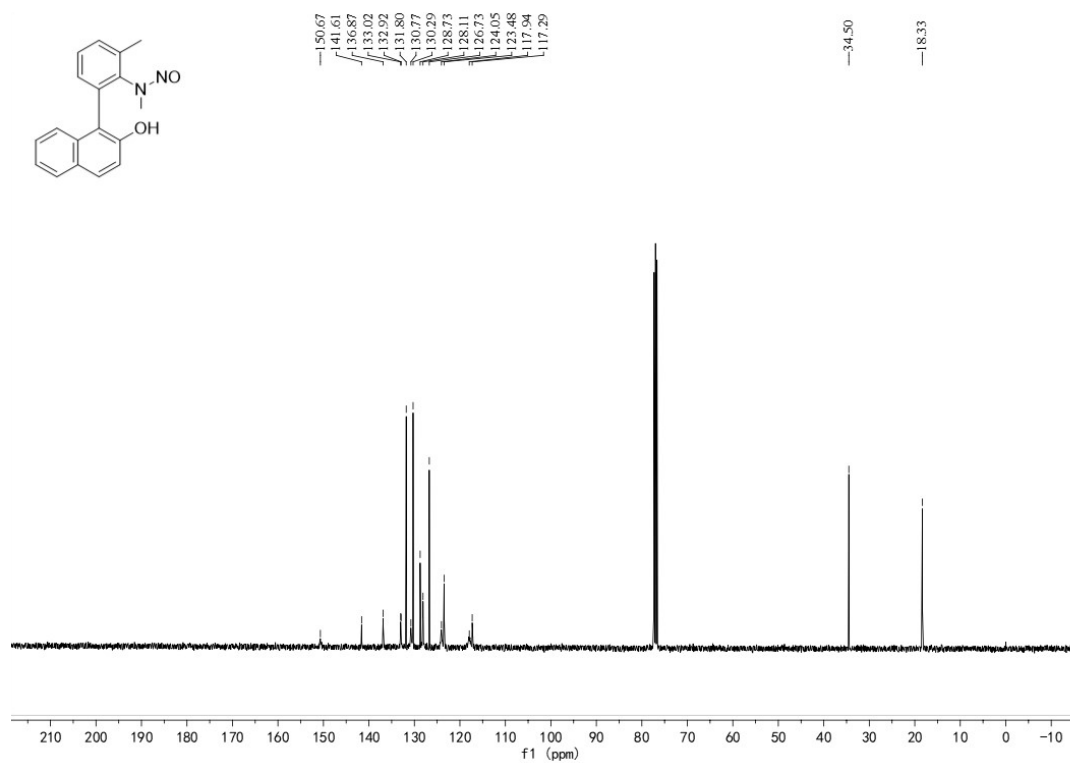

### <sup>1</sup>H NMR (400 MHz) Spectrum of 3k in CDCl<sub>3</sub>

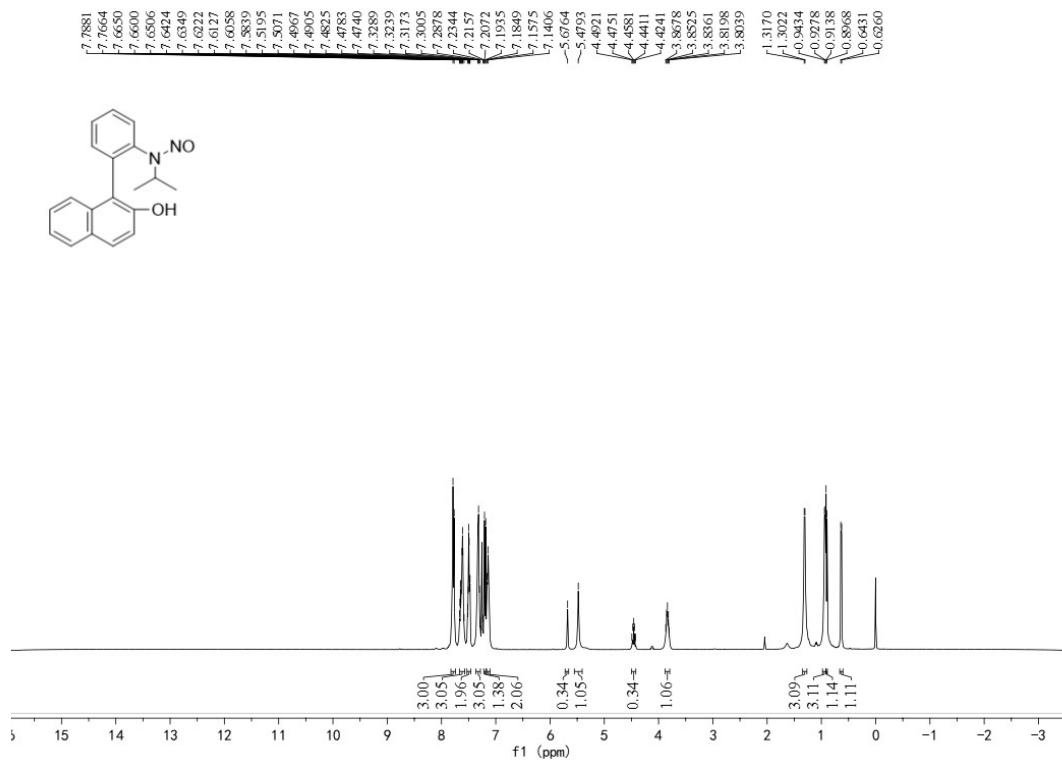

### <sup>13</sup>C NMR (101 MHz) Spectrum of 3k in CDCl<sub>3</sub>

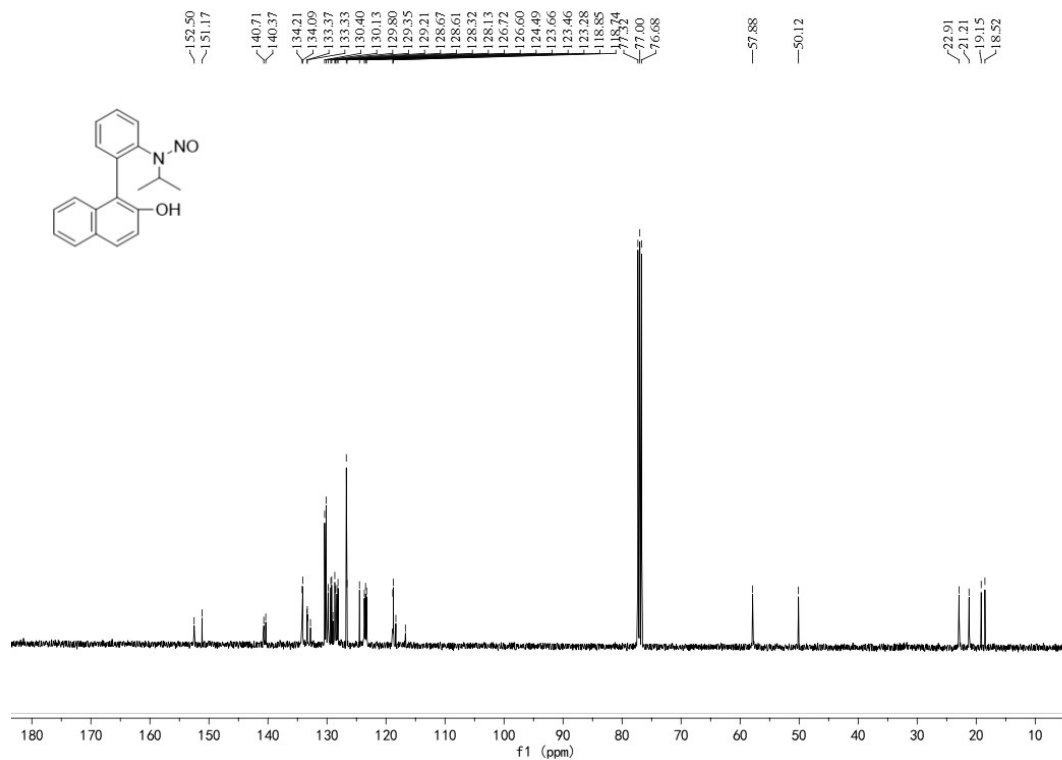



### <sup>1</sup>H NMR (400 MHz) Spectrum of 3l in CDCl<sub>3</sub>

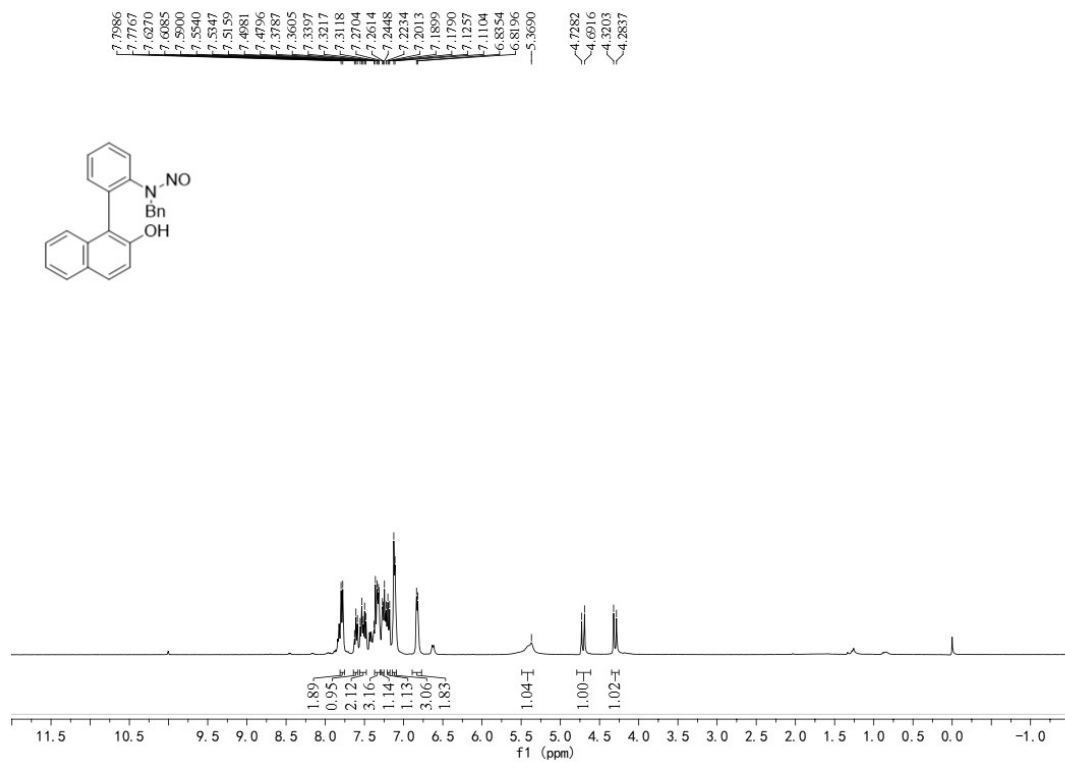

### <sup>13</sup>C NMR (101 MHz) Spectrum of 3l in CDCl<sub>3</sub>

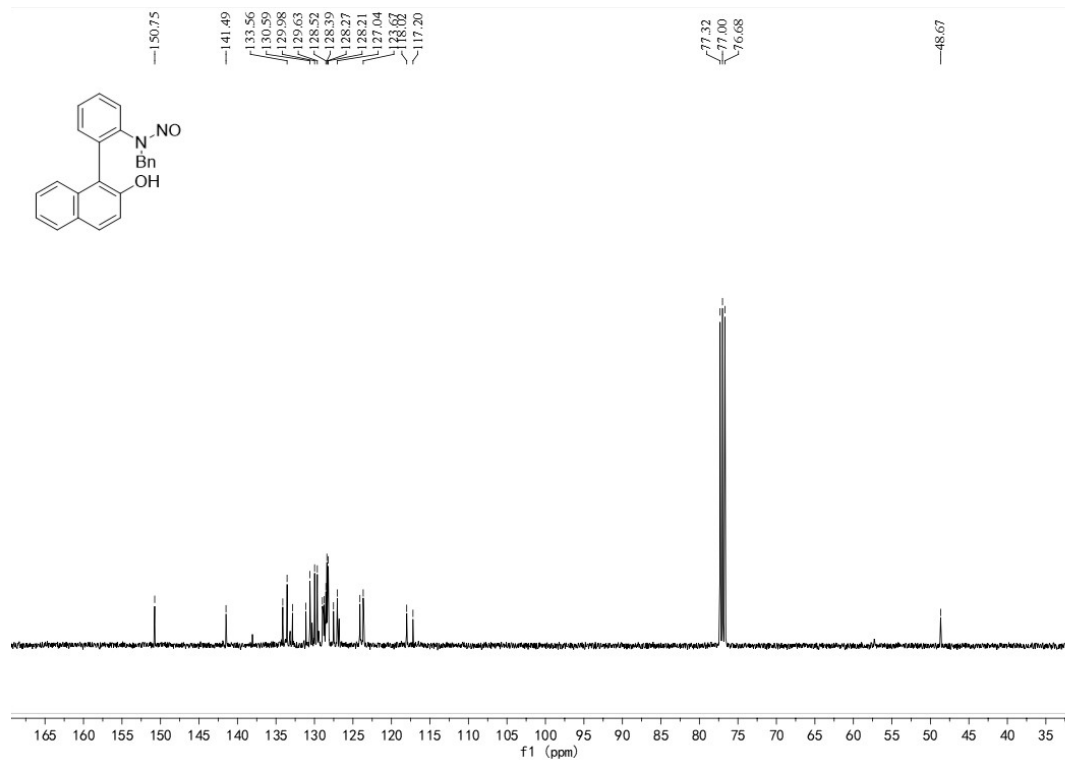

### $^1\text{H}$ NMR (400 MHz) Spectrum of 3ab in $\text{CDCl}_3$

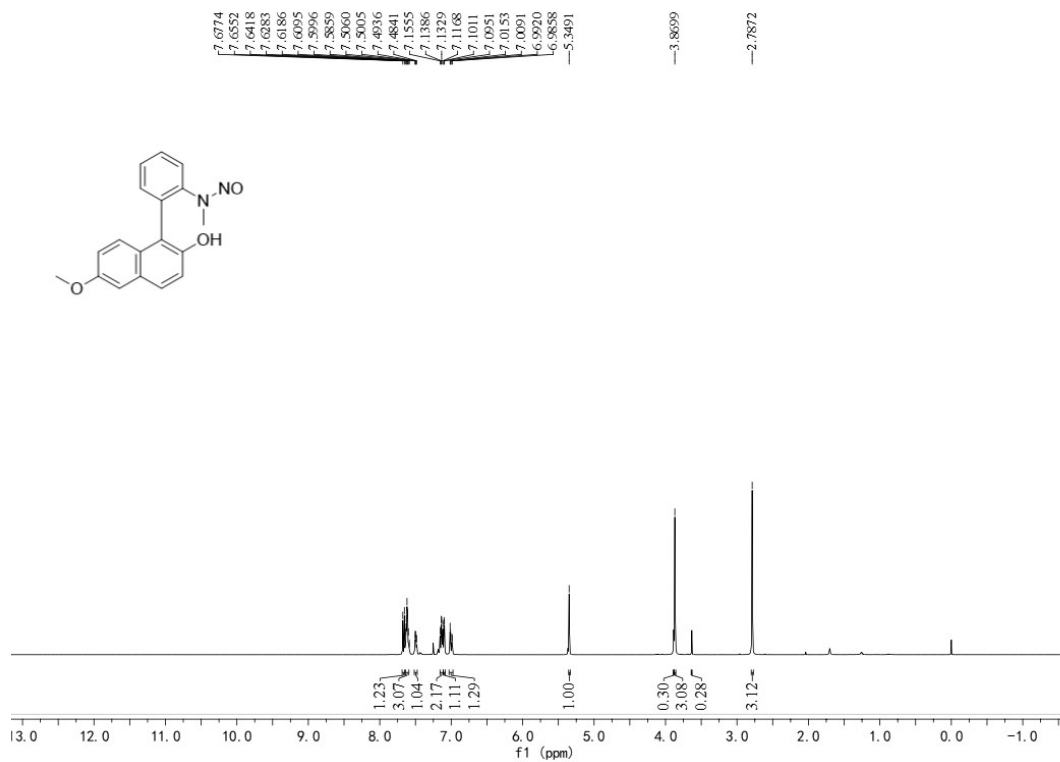

### $^{13}\text{C}$ NMR (101 MHz) Spectrum of 3ab in $\text{CDCl}_3$

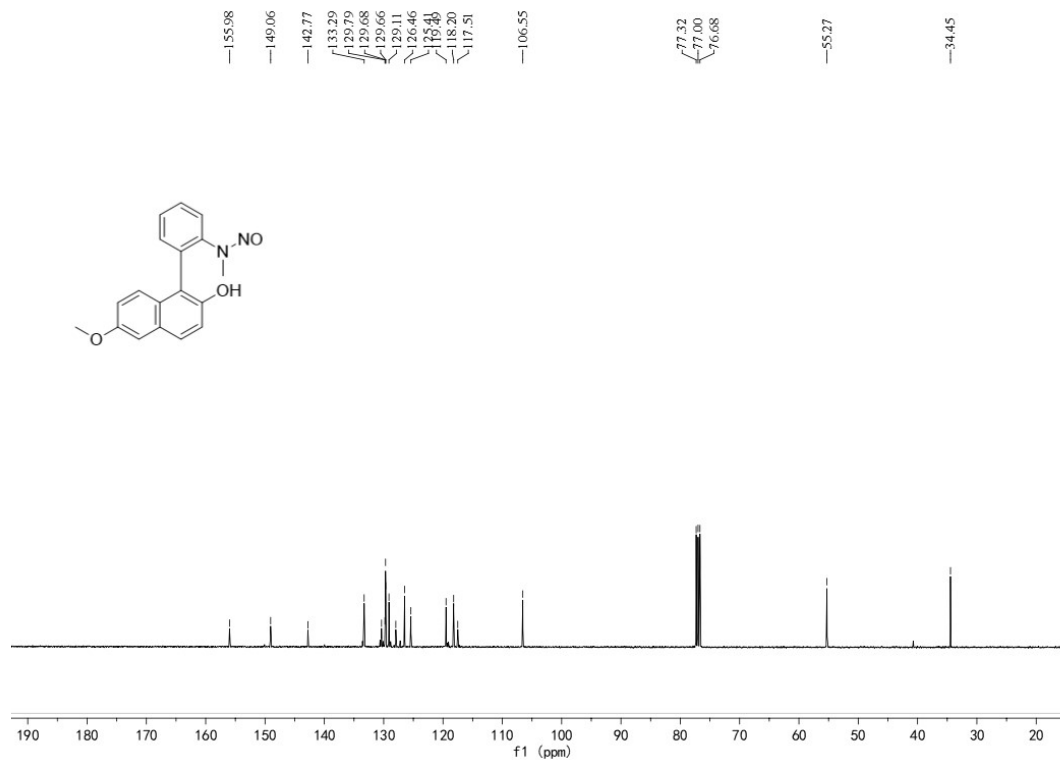

### $^1\text{H}$ NMR (400 MHz) Spectrum of 3ac in $\text{CDCl}_3$

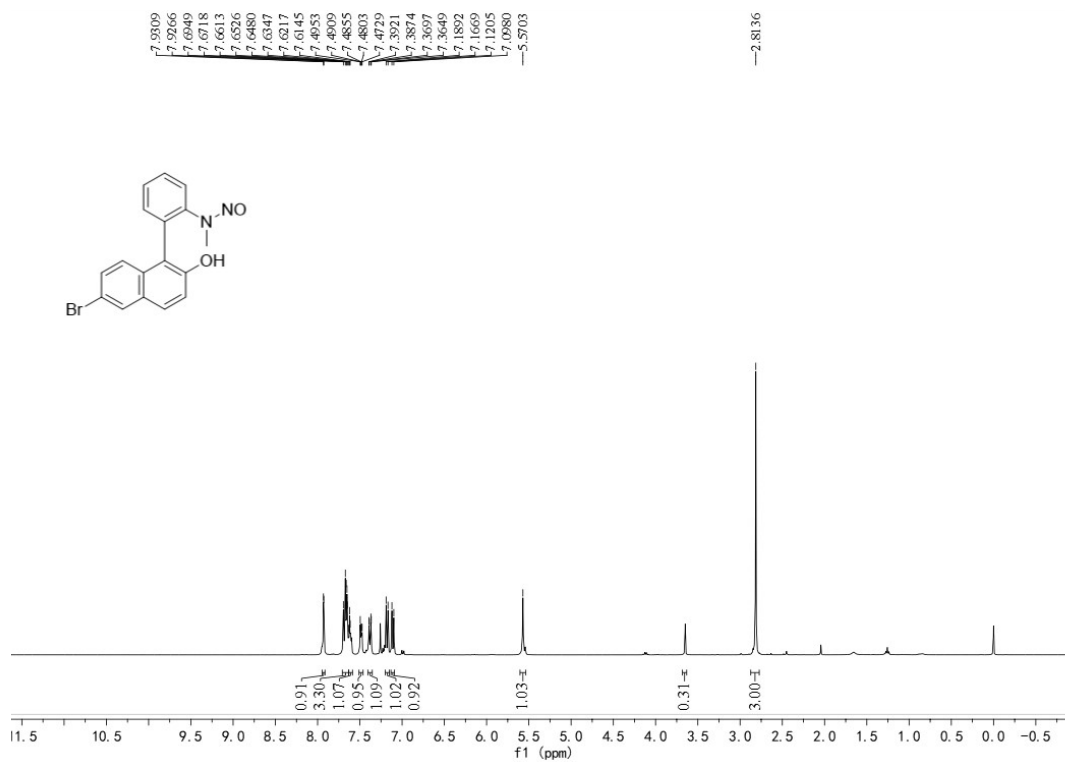

**<sup>13</sup>C NMR (101 MHz) Spectrum of 3c in CDCl<sub>3</sub>**

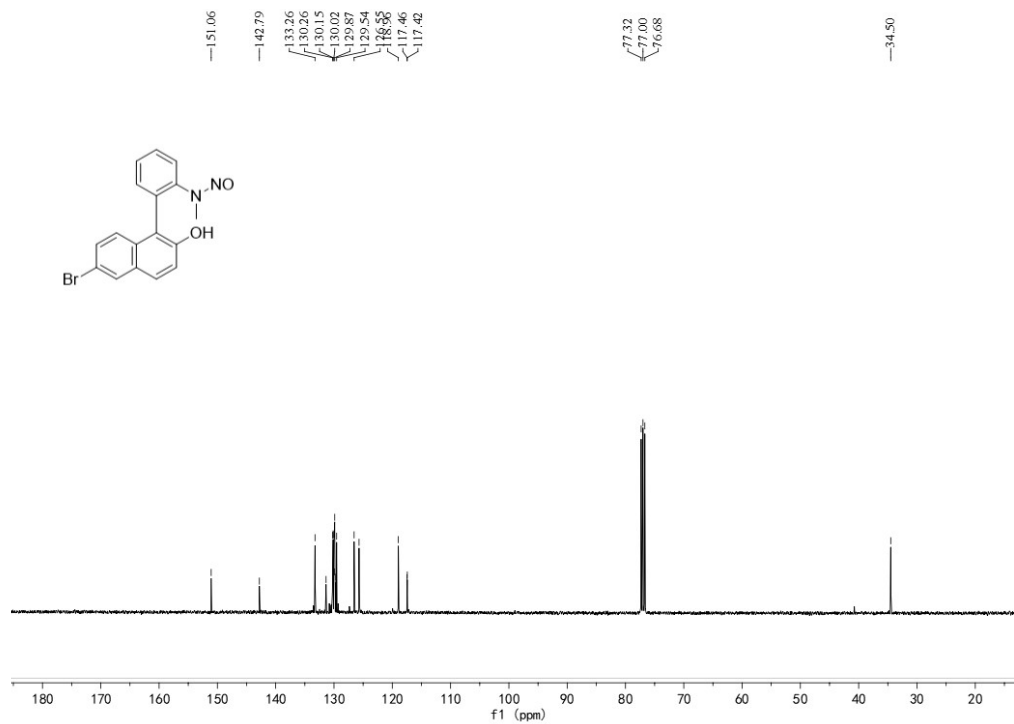

**<sup>1</sup>H NMR (400 MHz) Spectrum of 3ad in CDCl<sub>3</sub>**

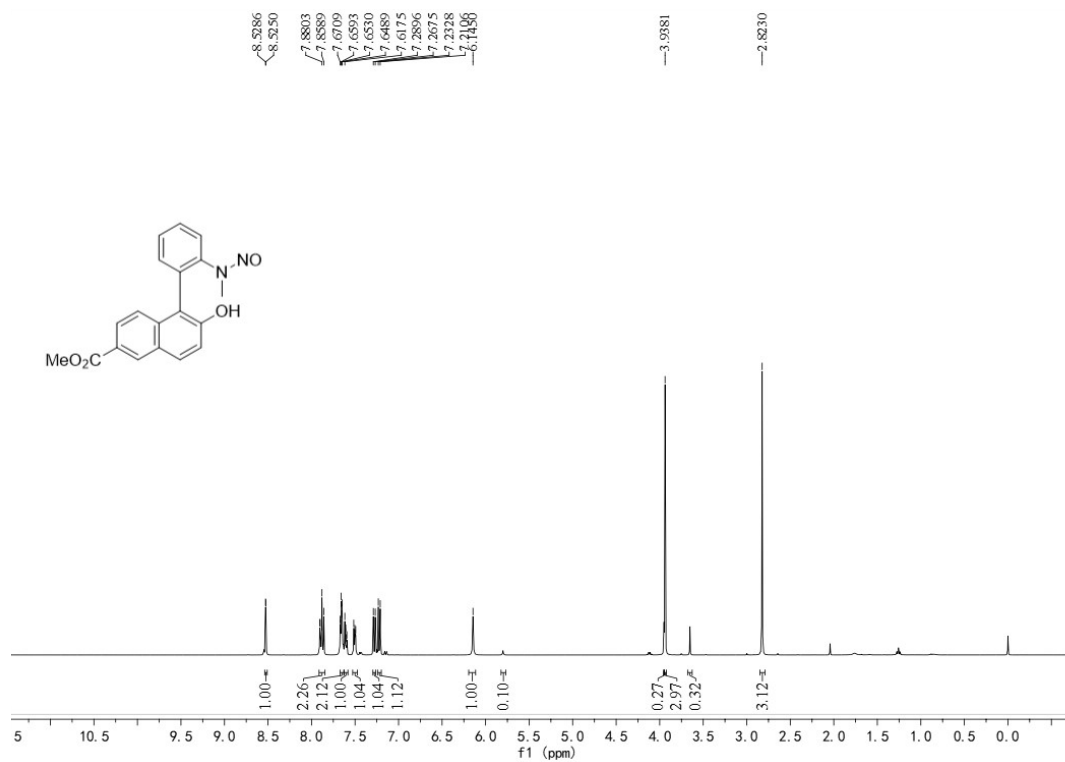

**<sup>13</sup>C NMR (101 MHz) Spectrum of 3ad in CDCl<sub>3</sub>**

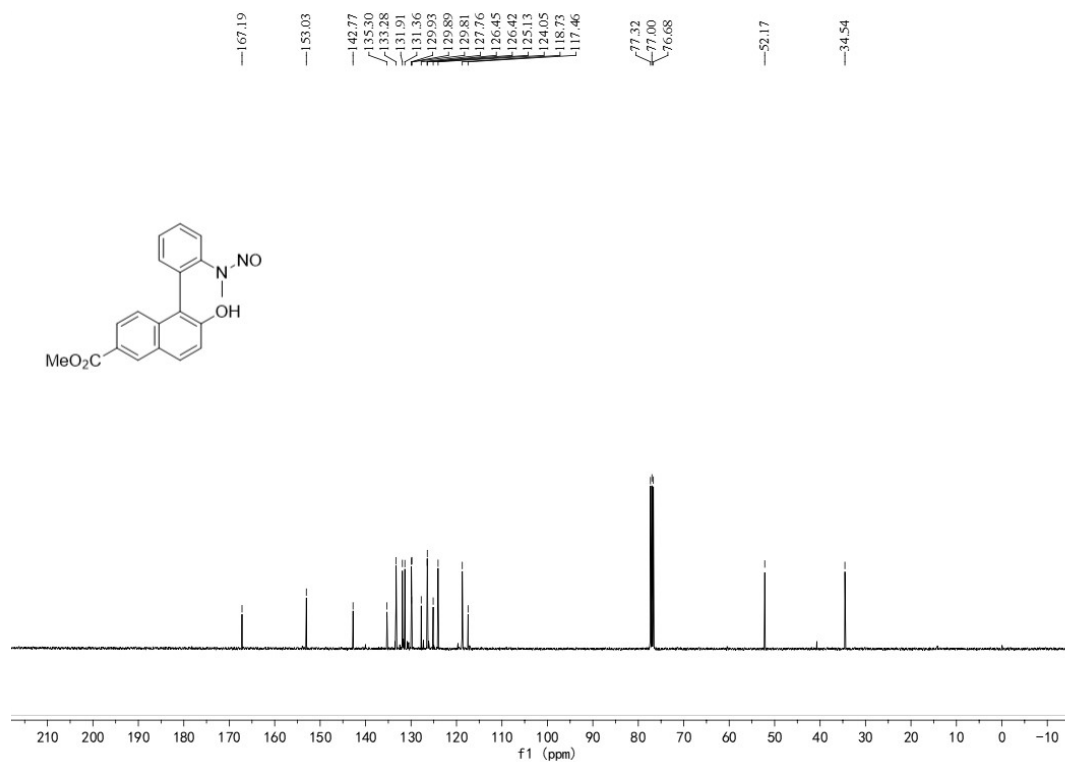

**<sup>1</sup>H NMR (400 MHz) Spectrum of 3ae in CDCl<sub>3</sub>**

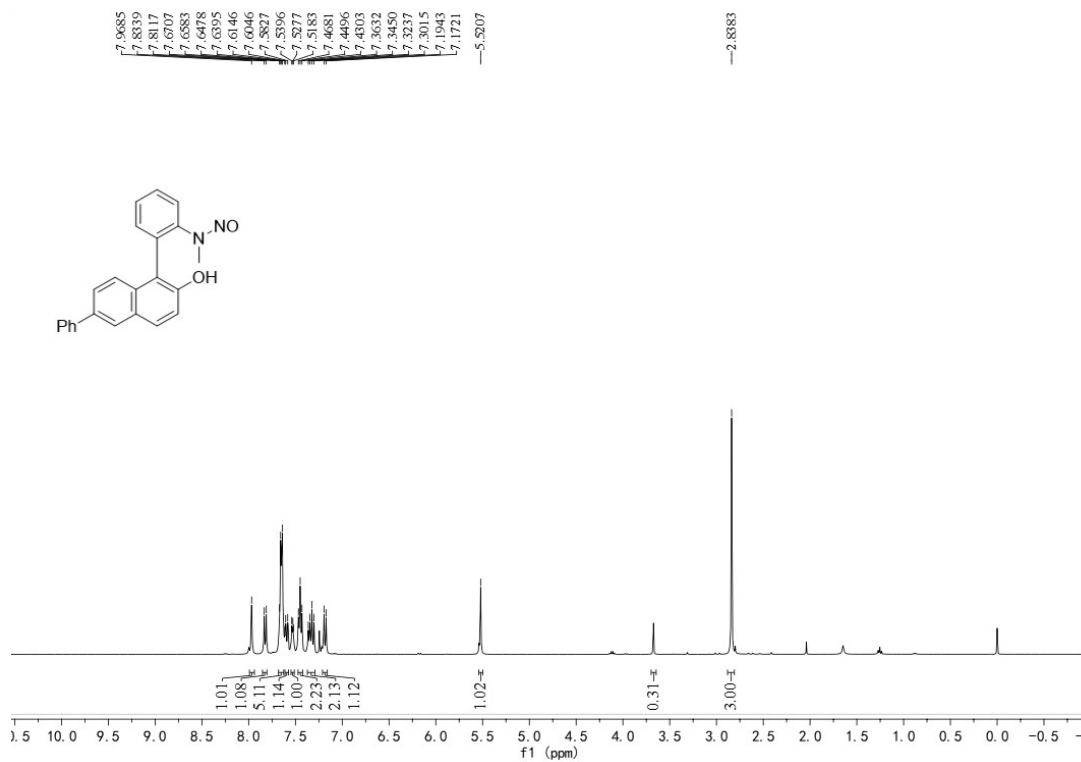

**<sup>13</sup>C NMR (101 MHz) Spectrum of 3ae in CDCl<sub>3</sub>**

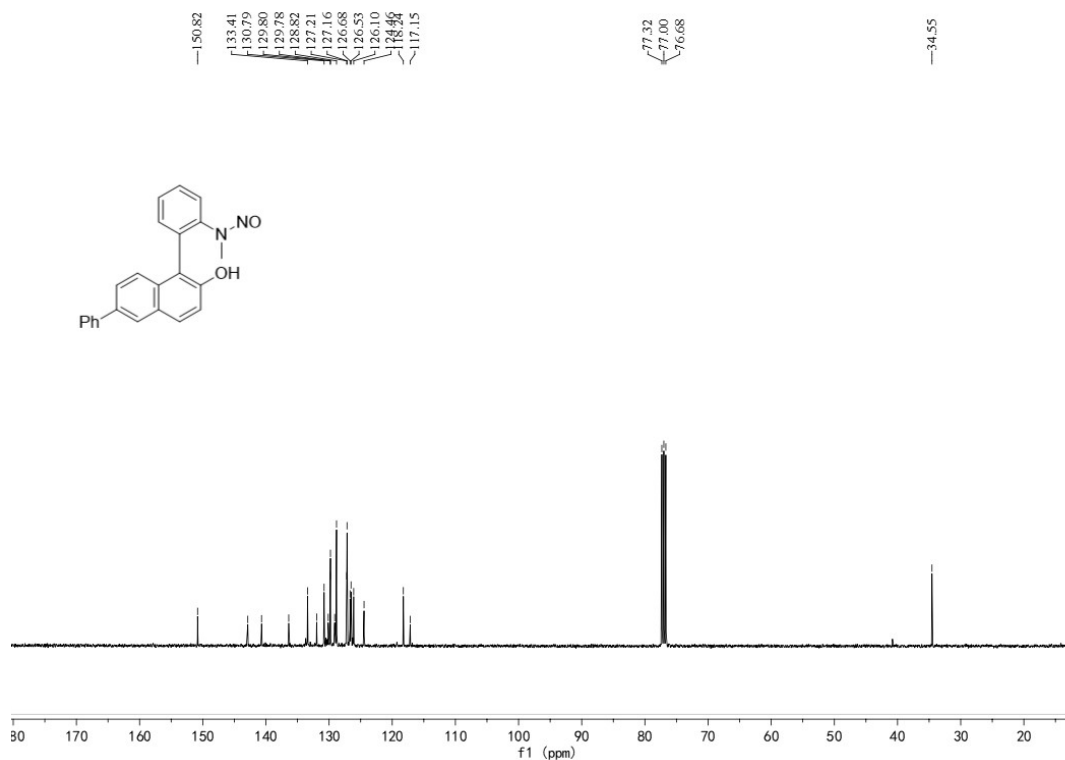

**<sup>1</sup>H NMR (400 MHz) Spectrum of 3af in CDCl<sub>3</sub>**

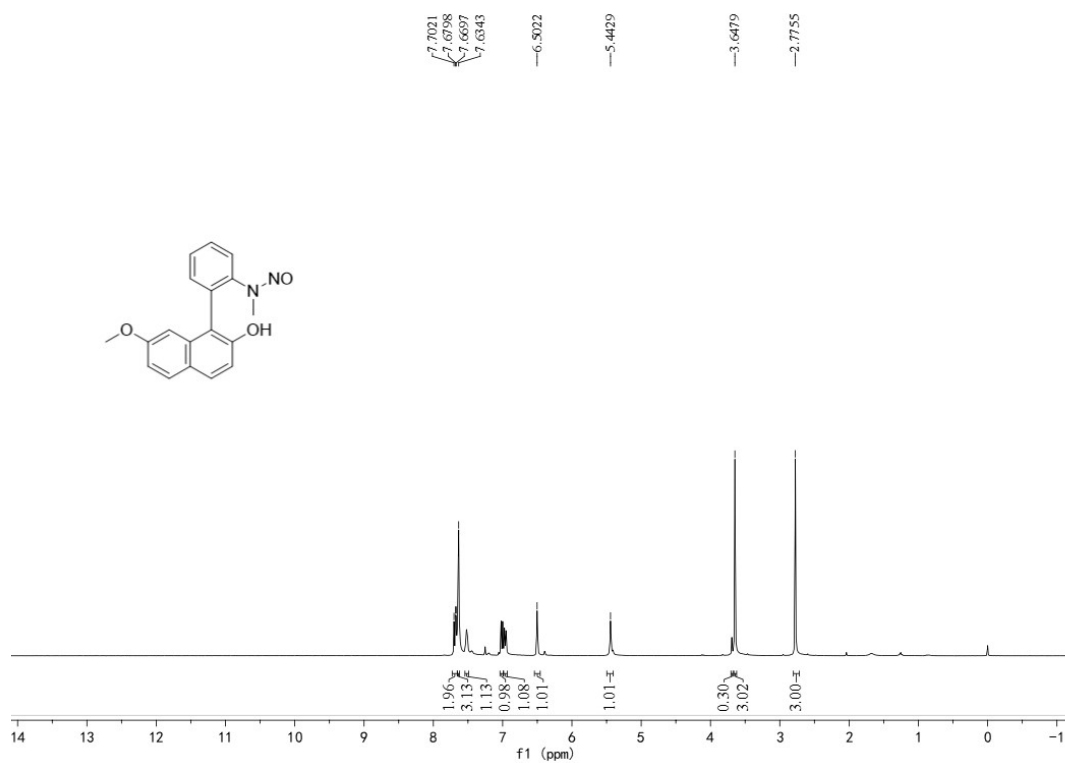

**<sup>13</sup>C NMR (101 MHz) Spectrum of 3af in CDCl<sub>3</sub>**

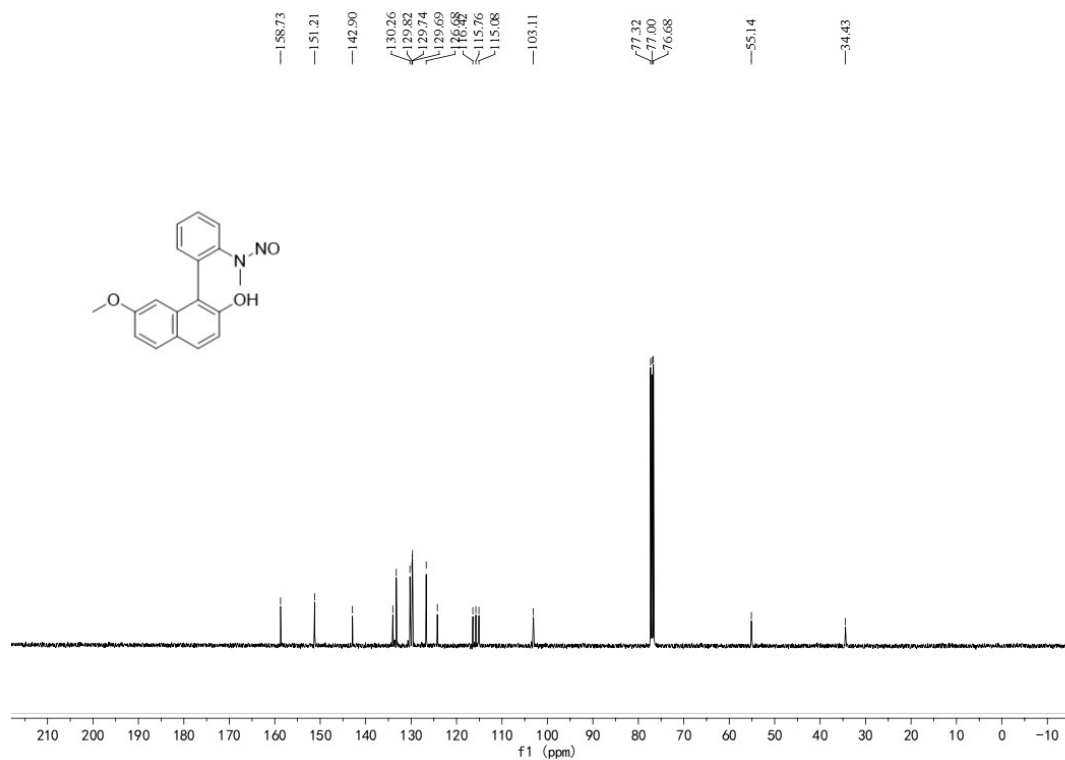

**<sup>1</sup>H NMR (400 MHz) Spectrum of 3ag in CDCl<sub>3</sub>**

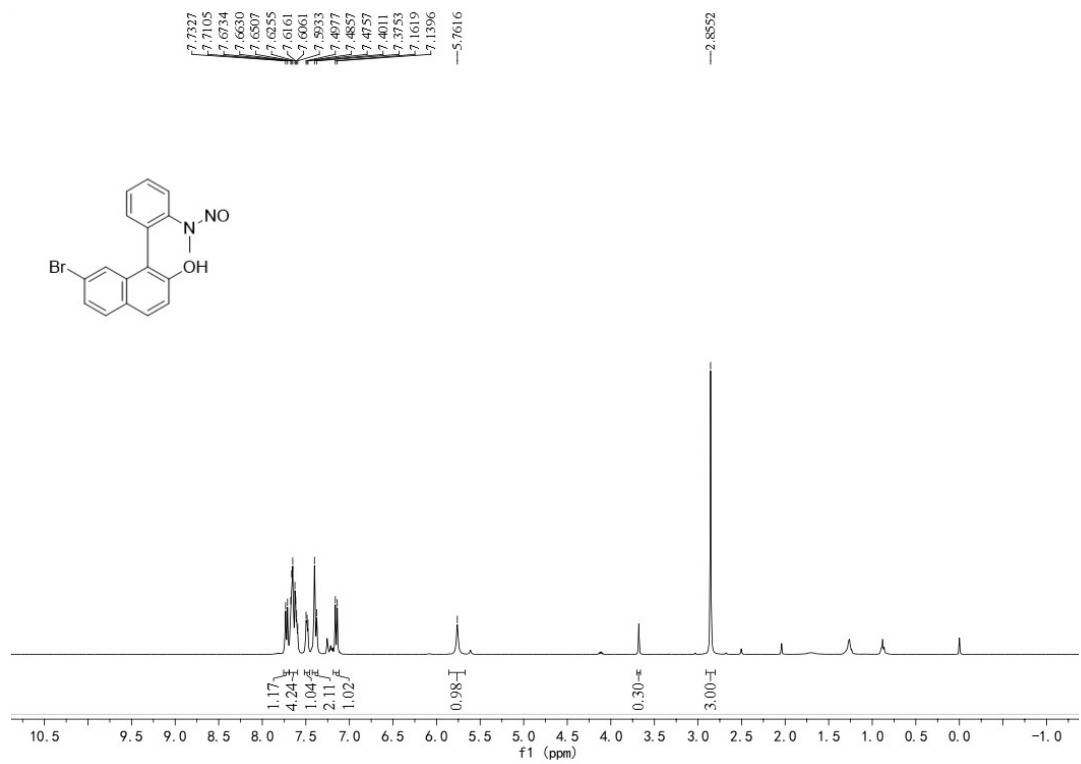

**<sup>13</sup>C NMR (101 MHz) Spectrum of 3a in CDCl<sub>3</sub>**

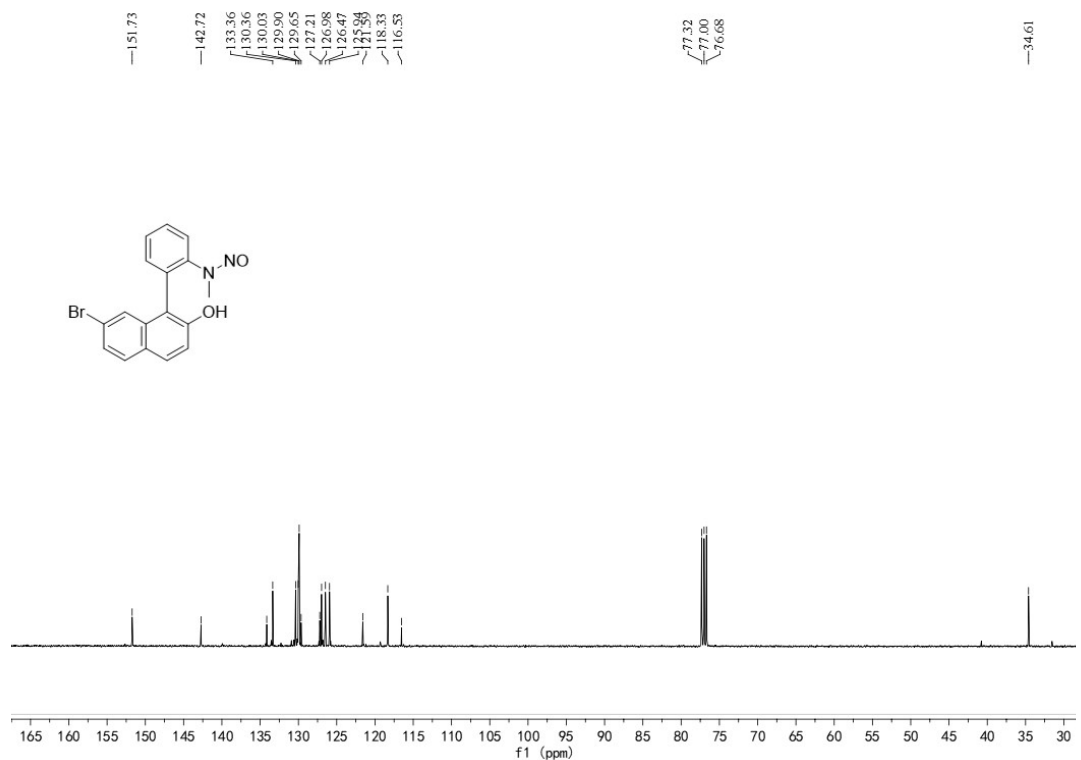

**<sup>1</sup>H NMR (400 MHz) Spectrum of 3ah in CDCl<sub>3</sub>**

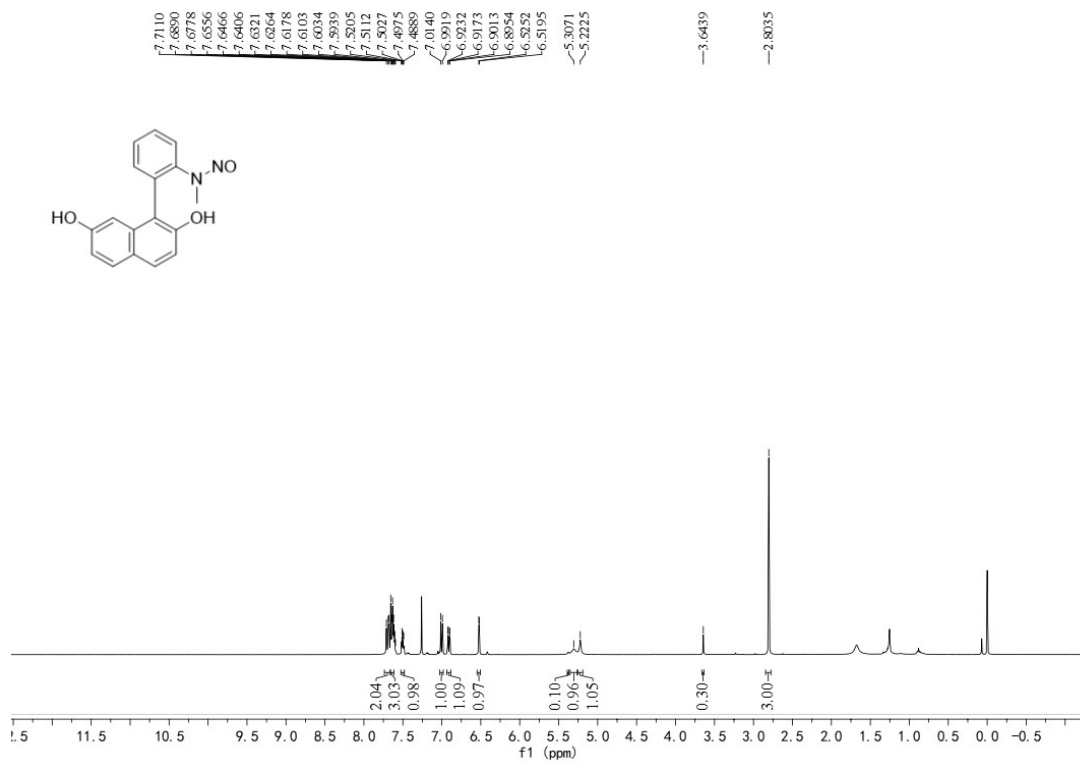

**<sup>13</sup>C NMR (101 MHz) Spectrum of 3a in CDCl<sub>3</sub>**

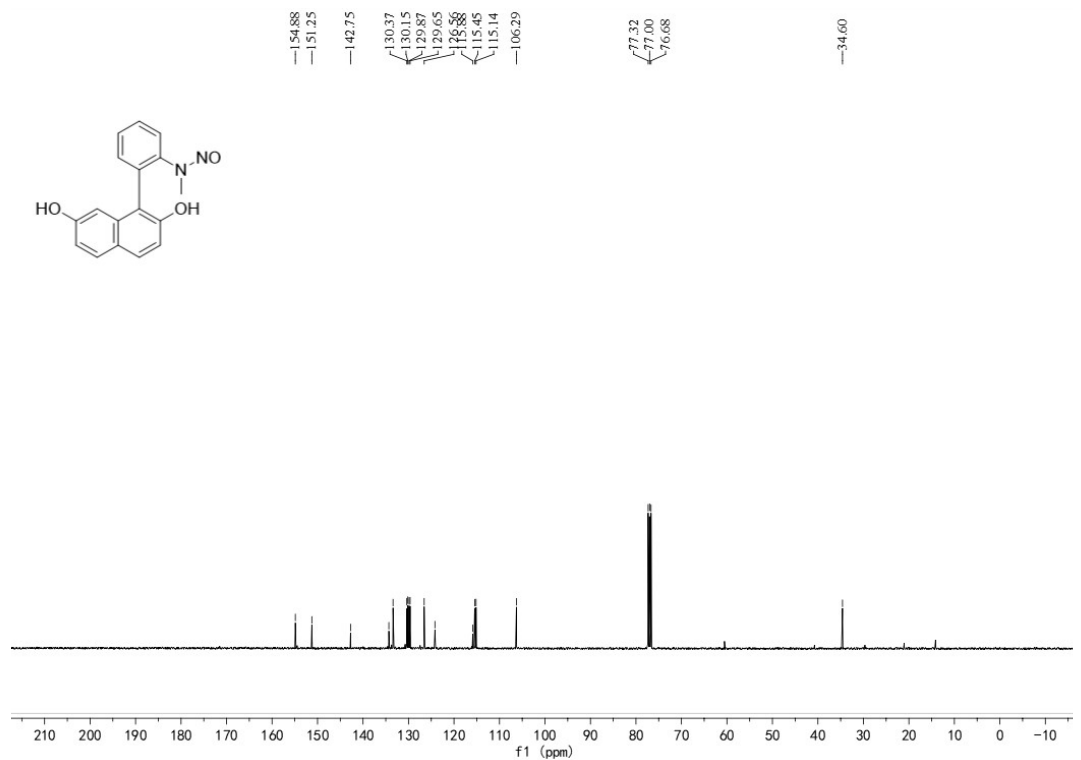

**<sup>1</sup>H NMR (400 MHz) Spectrum of 3ai in CDCl<sub>3</sub>**



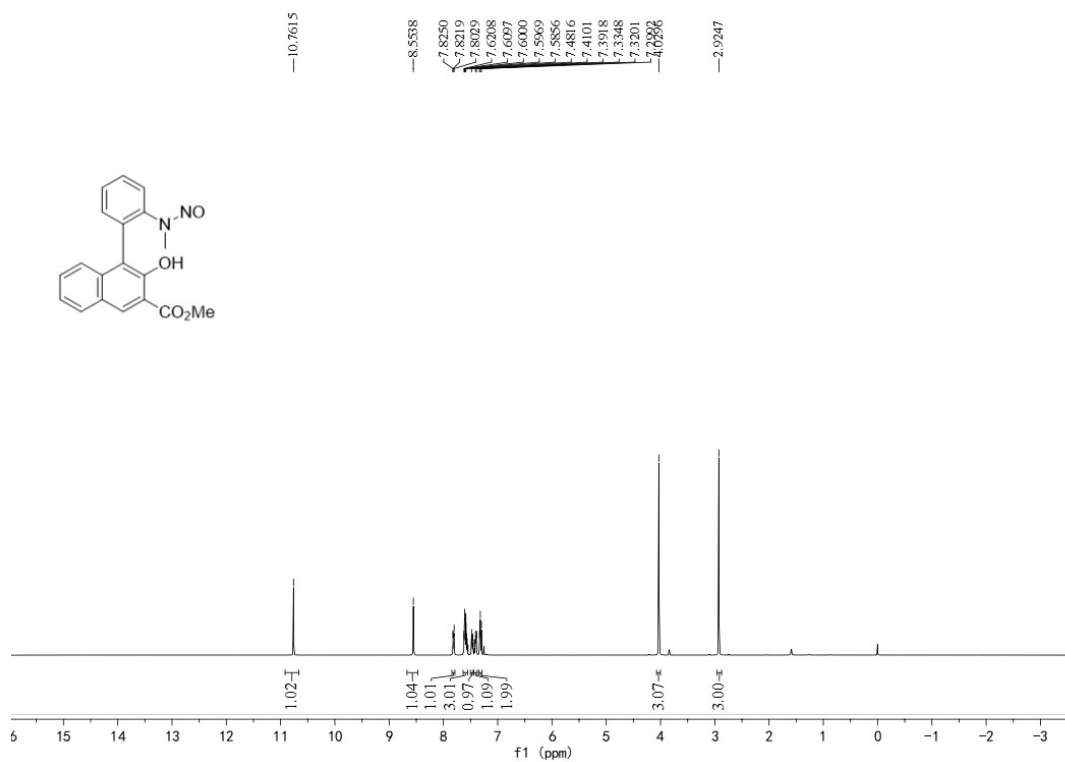

**<sup>13</sup>C NMR (101 MHz) Spectrum of 3ai in CDCl<sub>3</sub>**

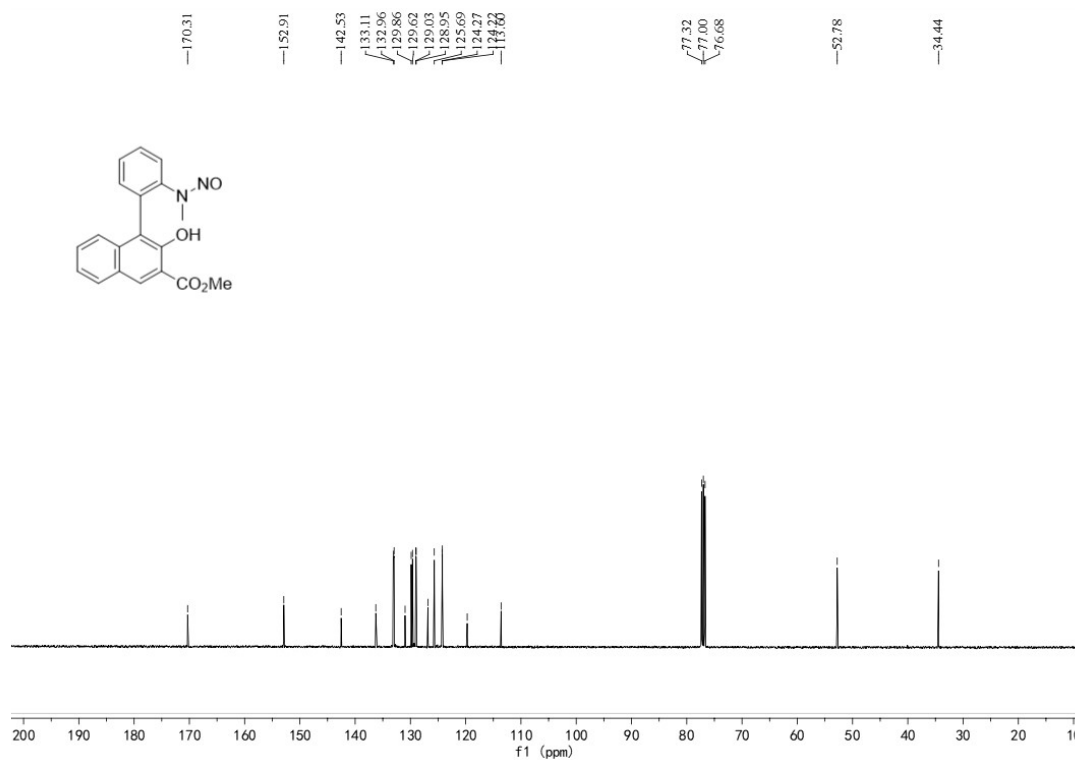

**<sup>1</sup>H NMR (400 MHz) Spectrum of 3aj in CDCl<sub>3</sub>**

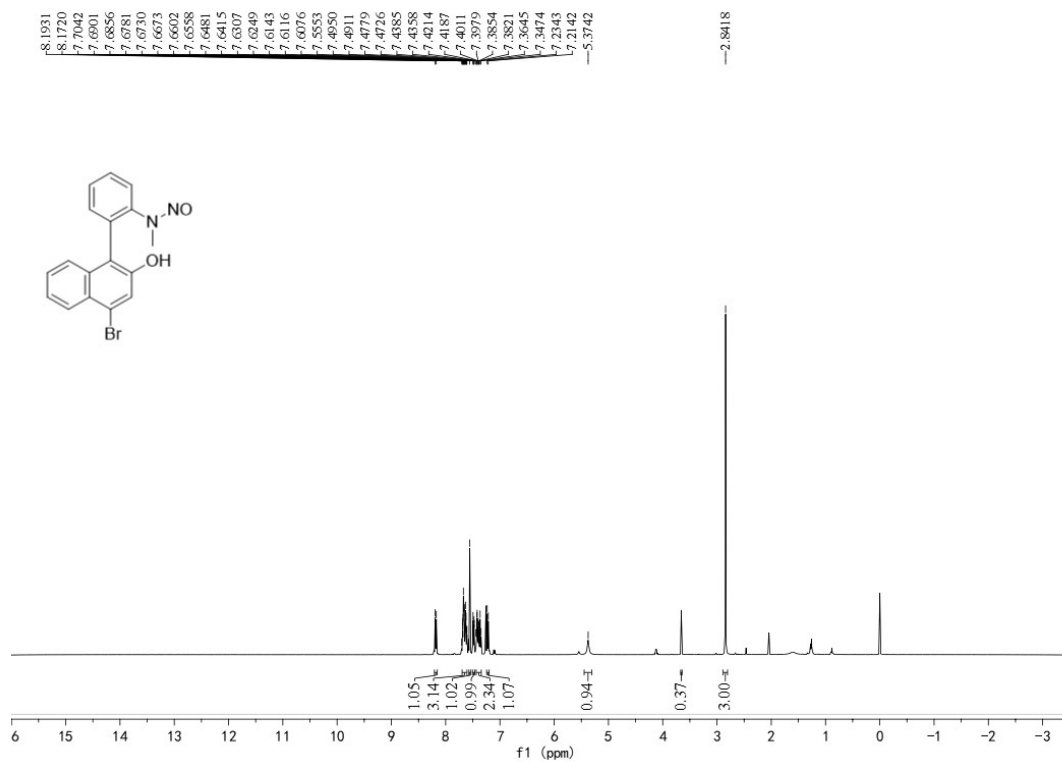

**<sup>13</sup>C NMR (101 MHz) Spectrum of 3aj in CDCl<sub>3</sub>**

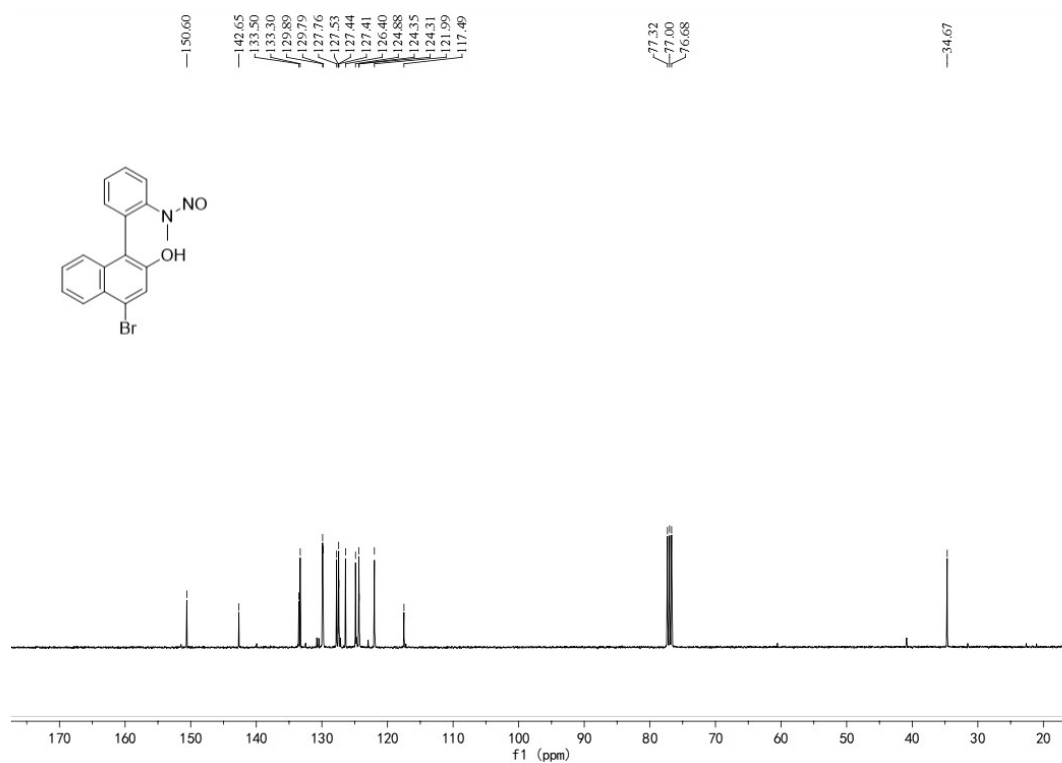

### <sup>1</sup>H NMR (400 MHz) Spectrum of 3ak in CDCl<sub>3</sub>

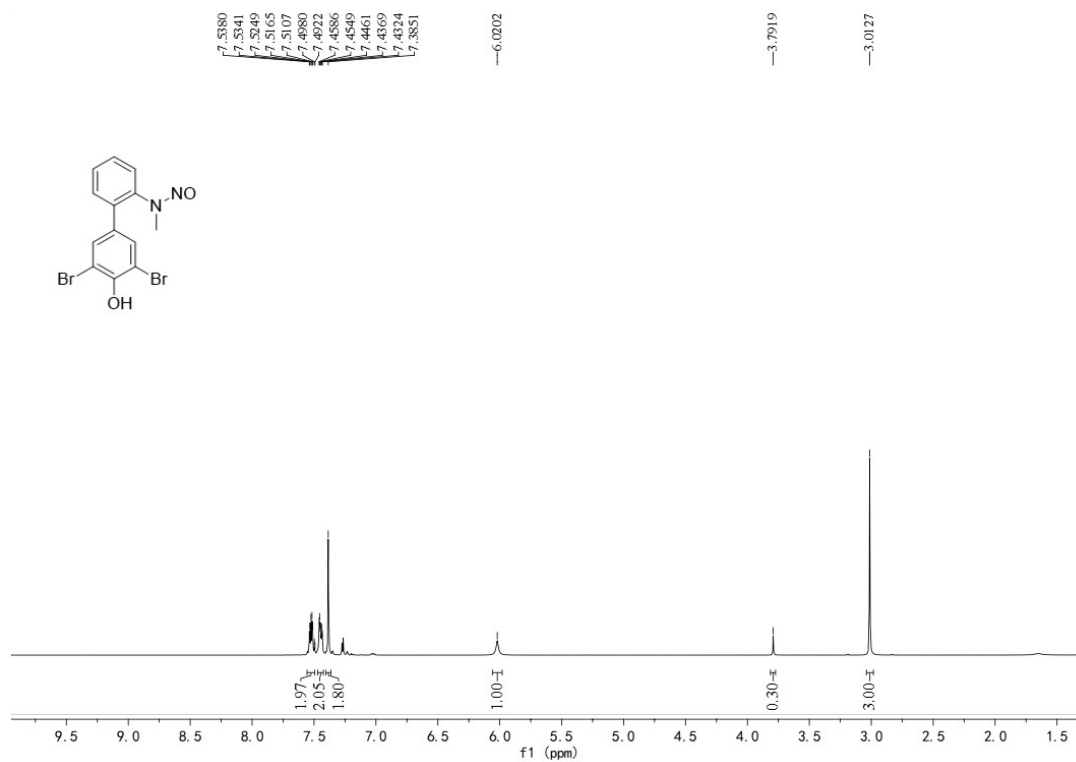

### <sup>13</sup>C NMR (101 MHz) Spectrum of 3ak in CDCl<sub>3</sub>

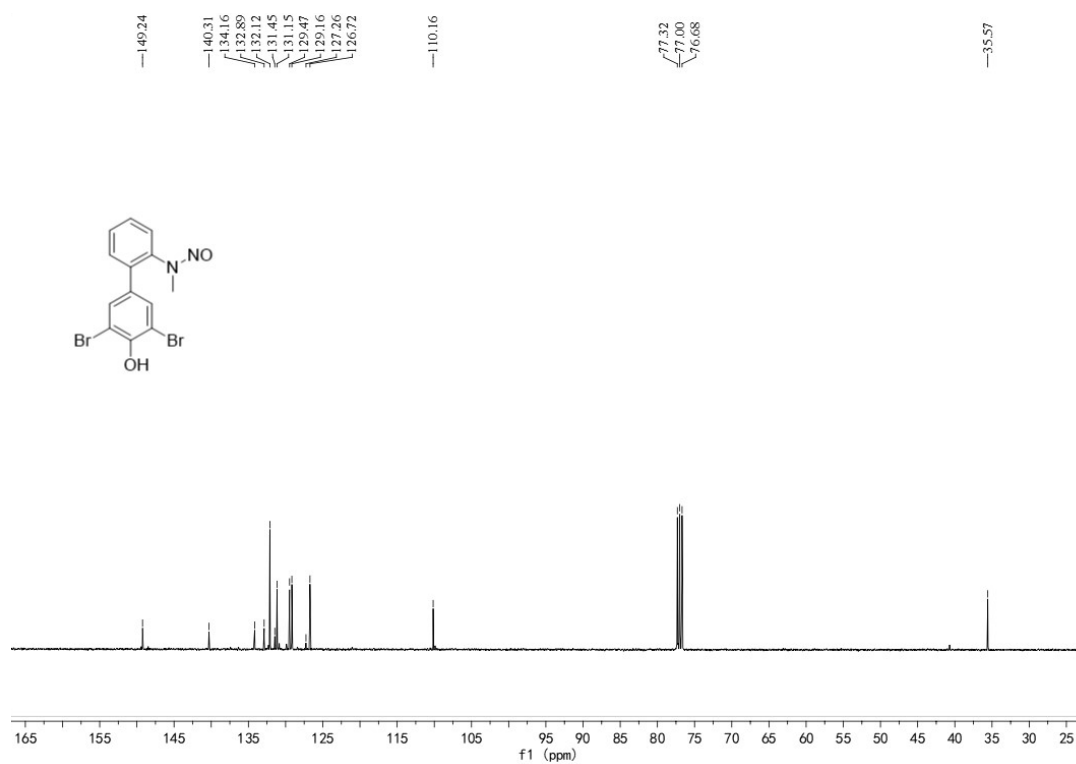

### <sup>1</sup>H NMR (400 MHz) Spectrum of 4 in CDCl<sub>3</sub>

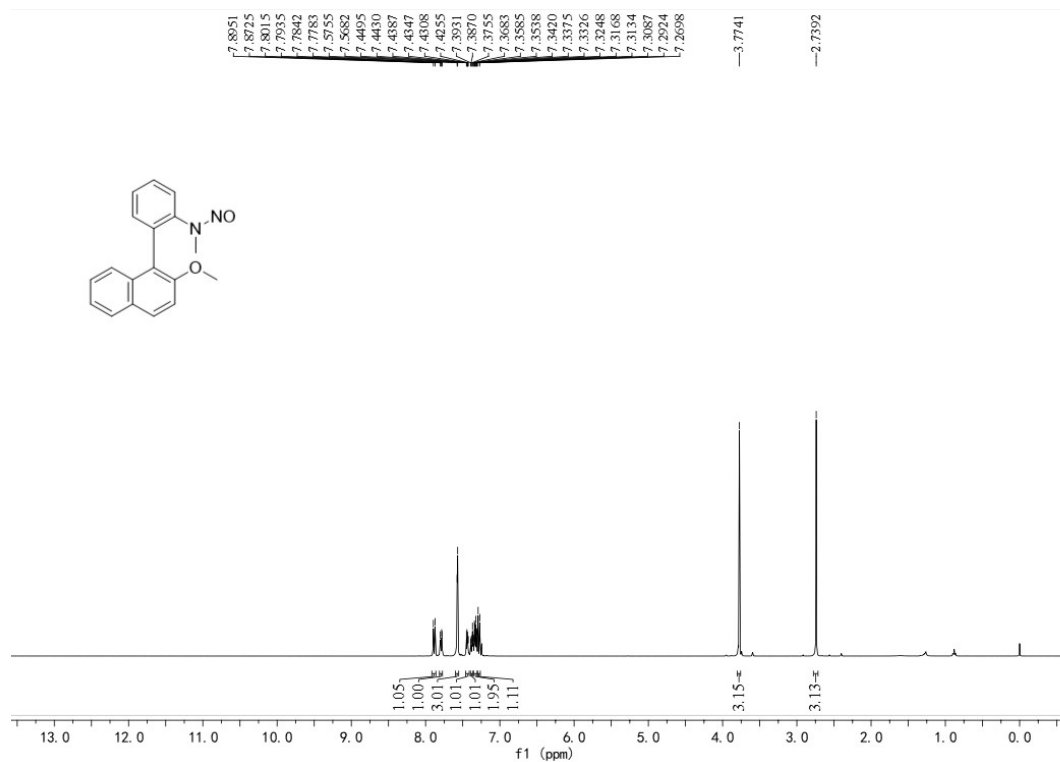

### <sup>13</sup>C NMR (101 MHz) Spectrum of 4 in CDCl<sub>3</sub>

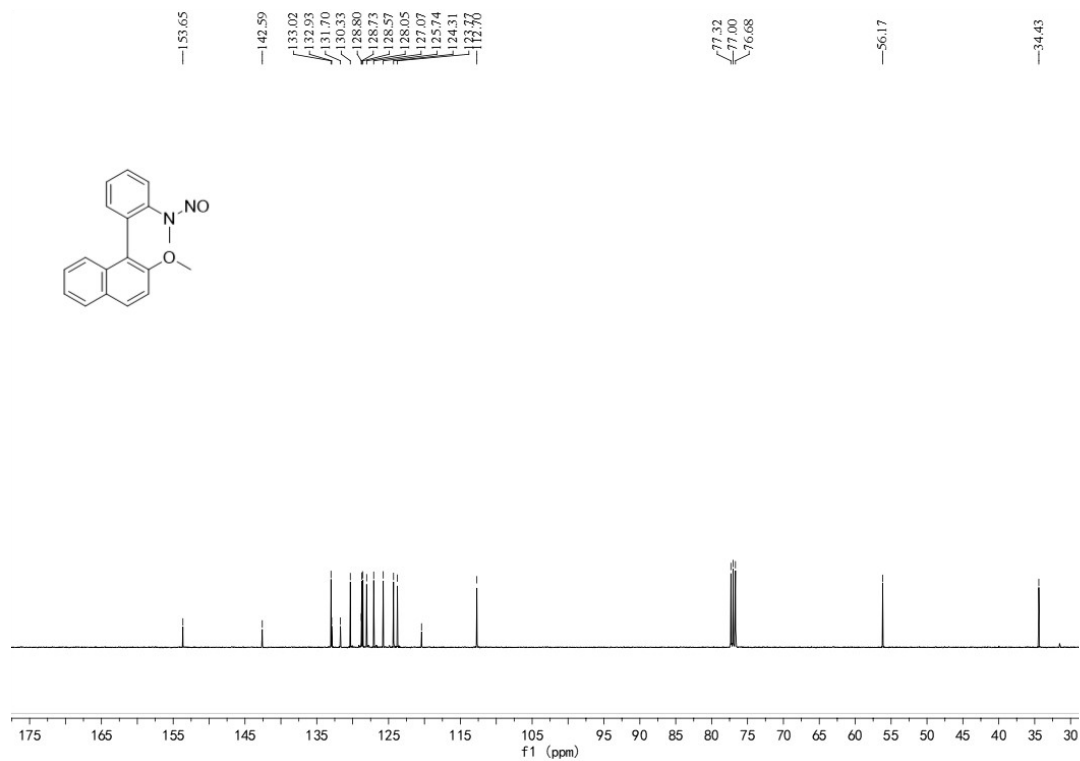

### <sup>1</sup>H NMR (400 MHz) Spectrum of 5 in CDCl<sub>3</sub>

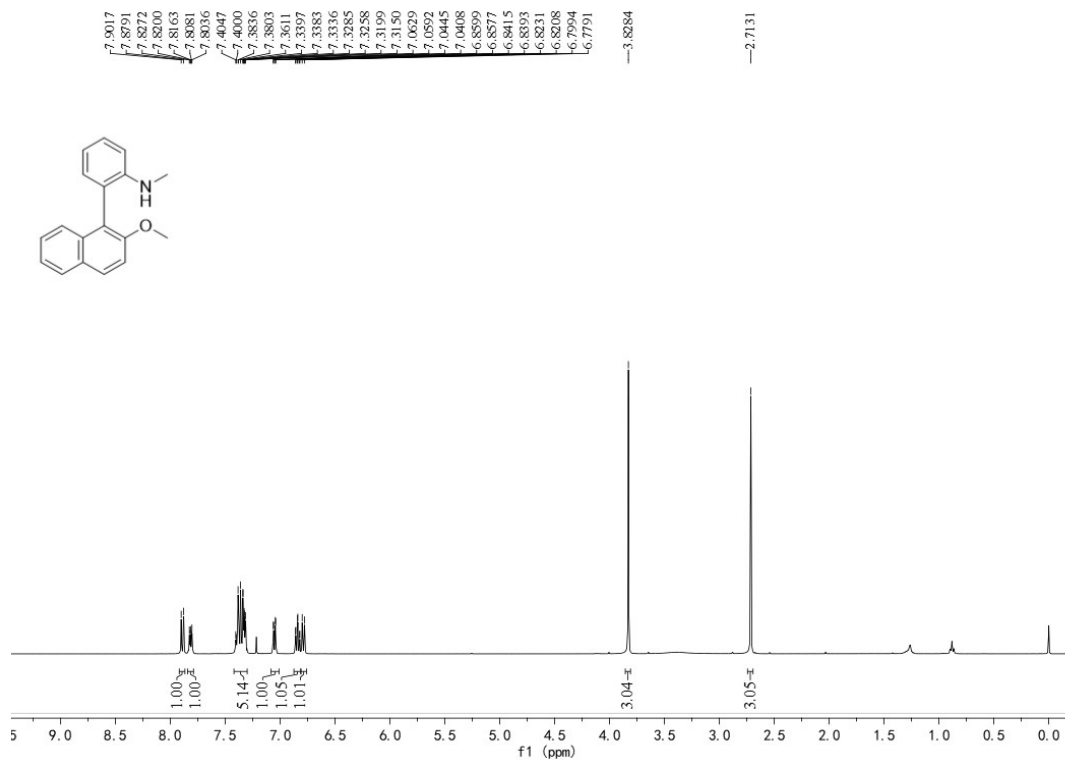

### <sup>13</sup>C NMR (101 MHz) Spectrum of 5 in CDCl<sub>3</sub>

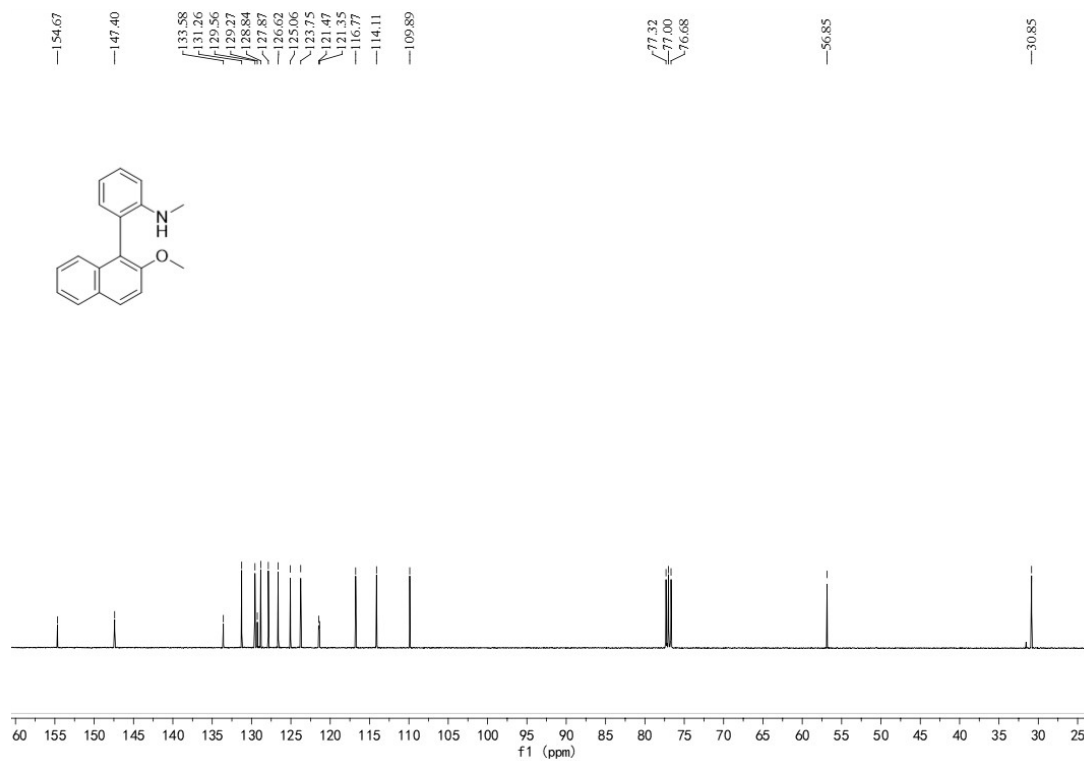

### <sup>1</sup>H NMR (400 MHz) Spectrum of 6 in CDCl<sub>3</sub>

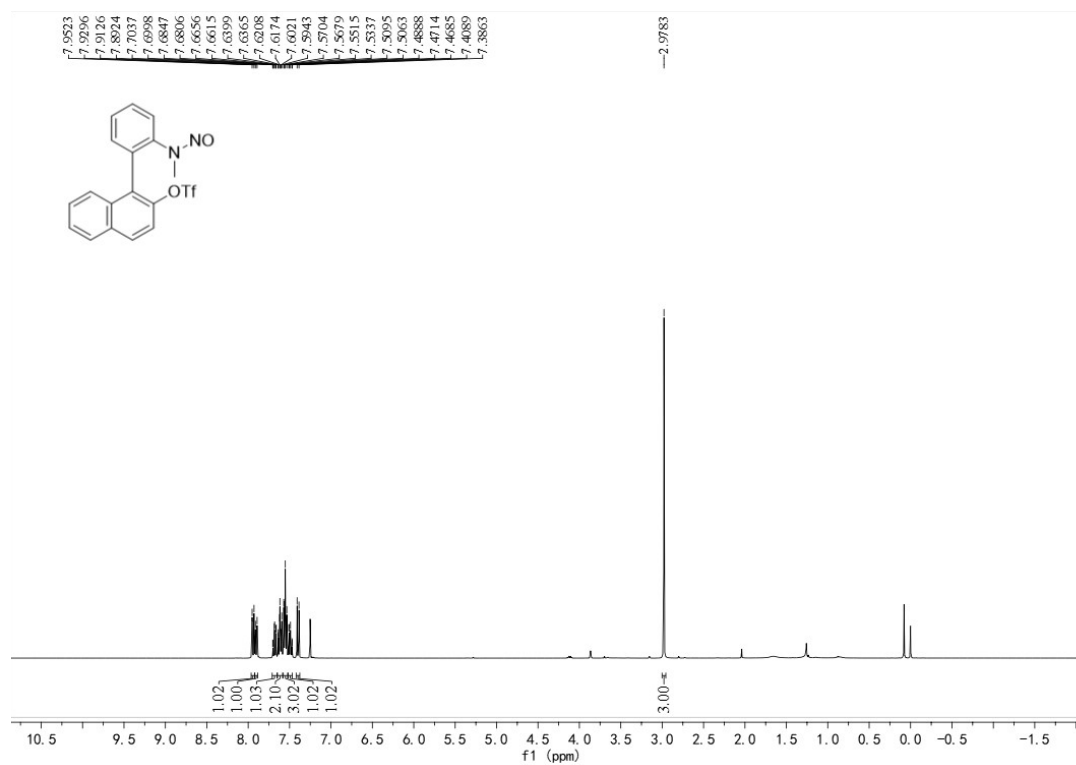

### <sup>13</sup>C NMR (101 MHz) Spectrum of 6 in CDCl<sub>3</sub>

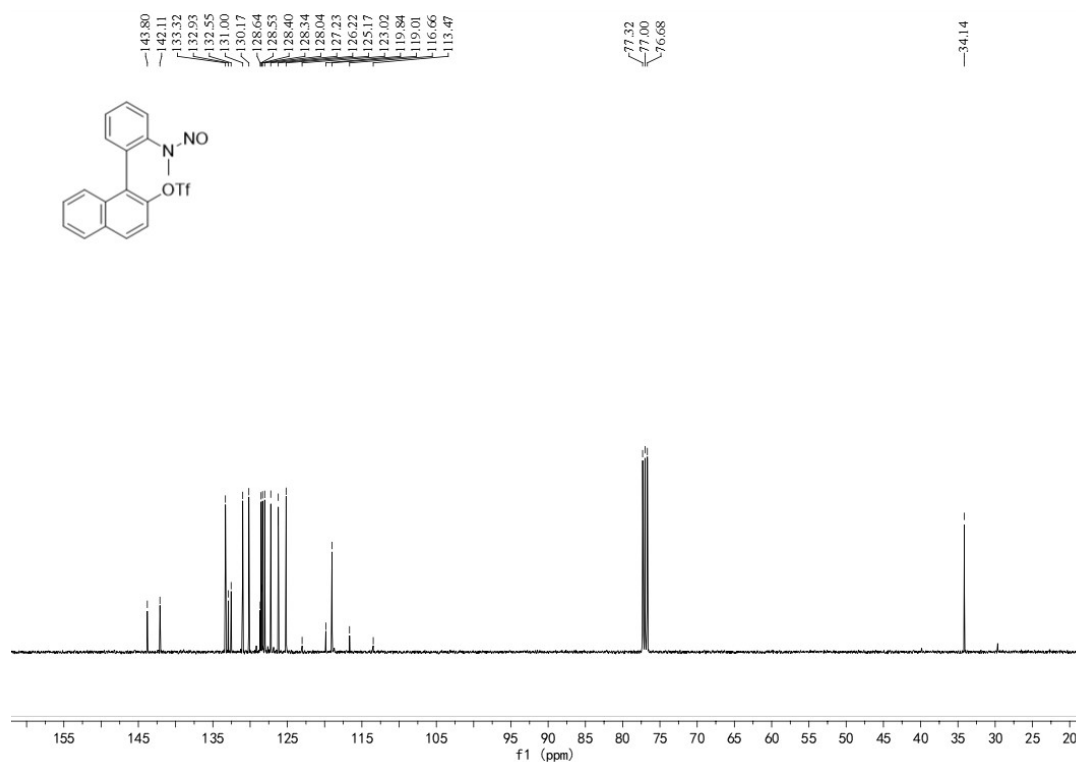

**<sup>19</sup>F NMR (376 MHz) Spectrum of 6 in CDCl<sub>3</sub>**

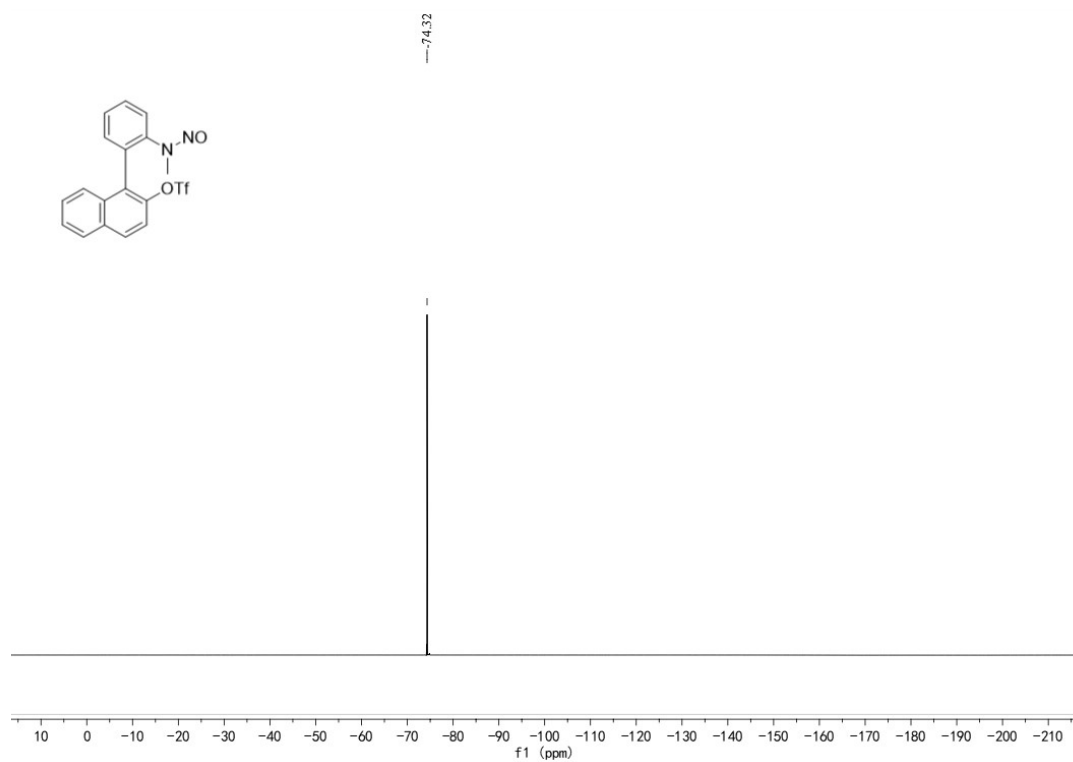

### <sup>1</sup>H NMR (400 MHz) Spectrum of 7 in CDCl<sub>3</sub>

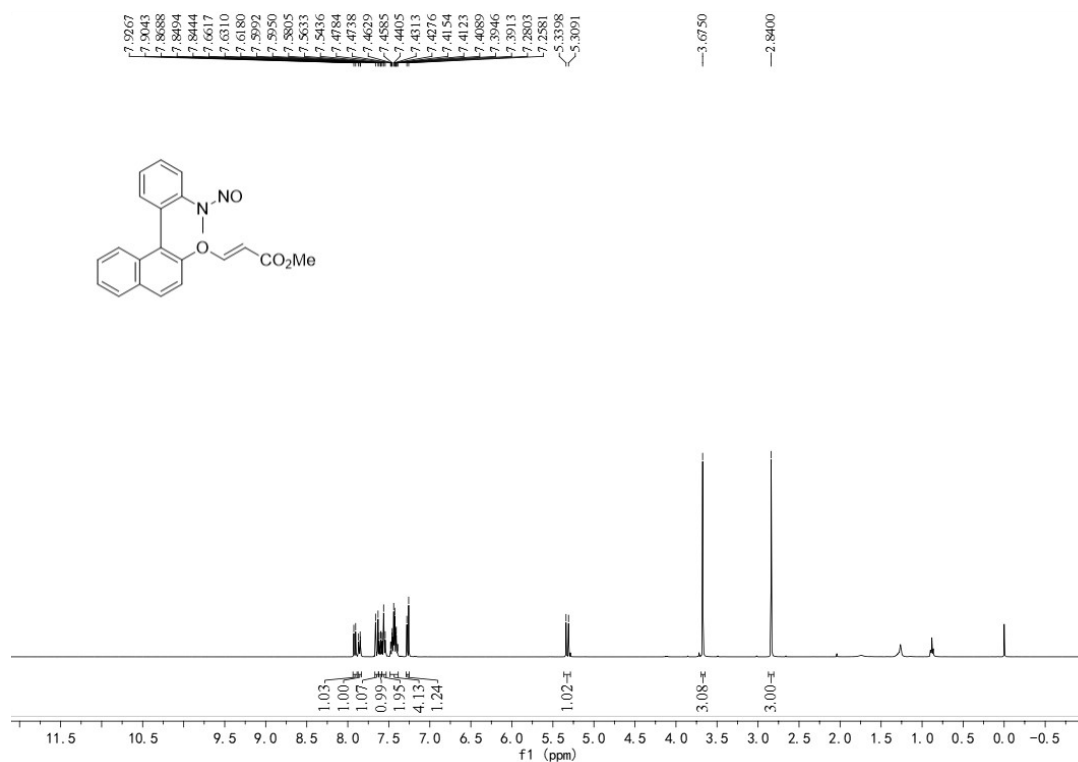

### <sup>13</sup>C NMR (101 MHz) Spectrum of 7 in CDCl<sub>3</sub>

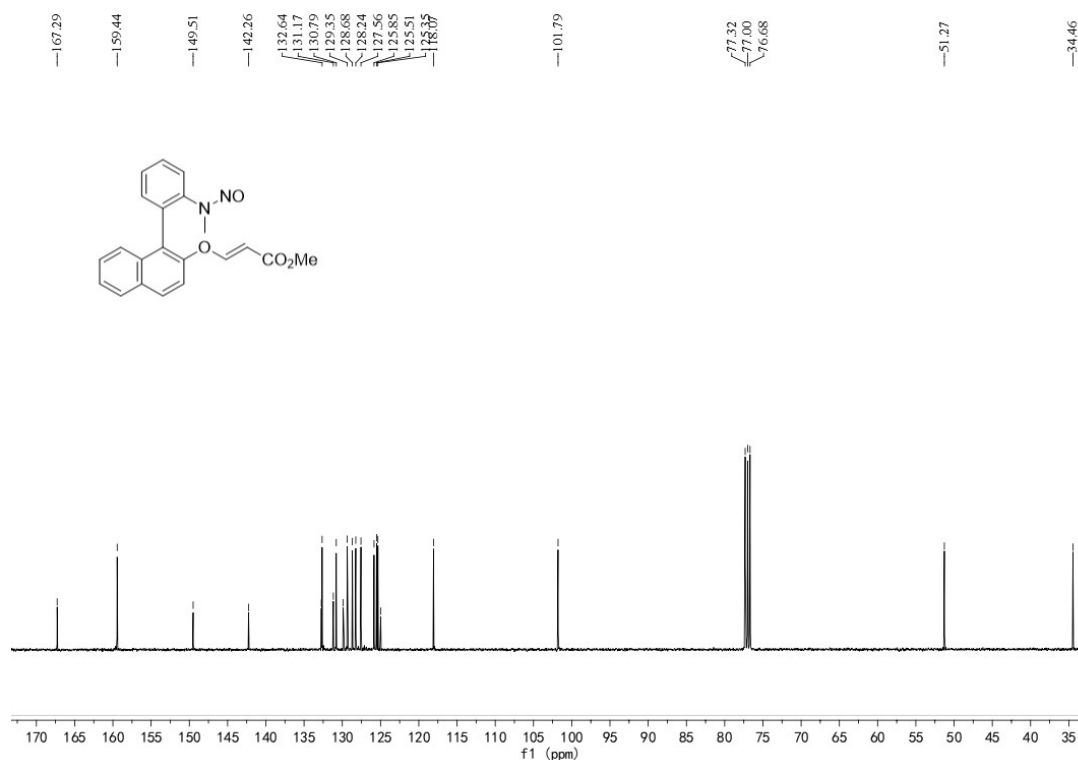



### <sup>1</sup>H NMR (400 MHz) Spectrum of 8 in CDCl<sub>3</sub>

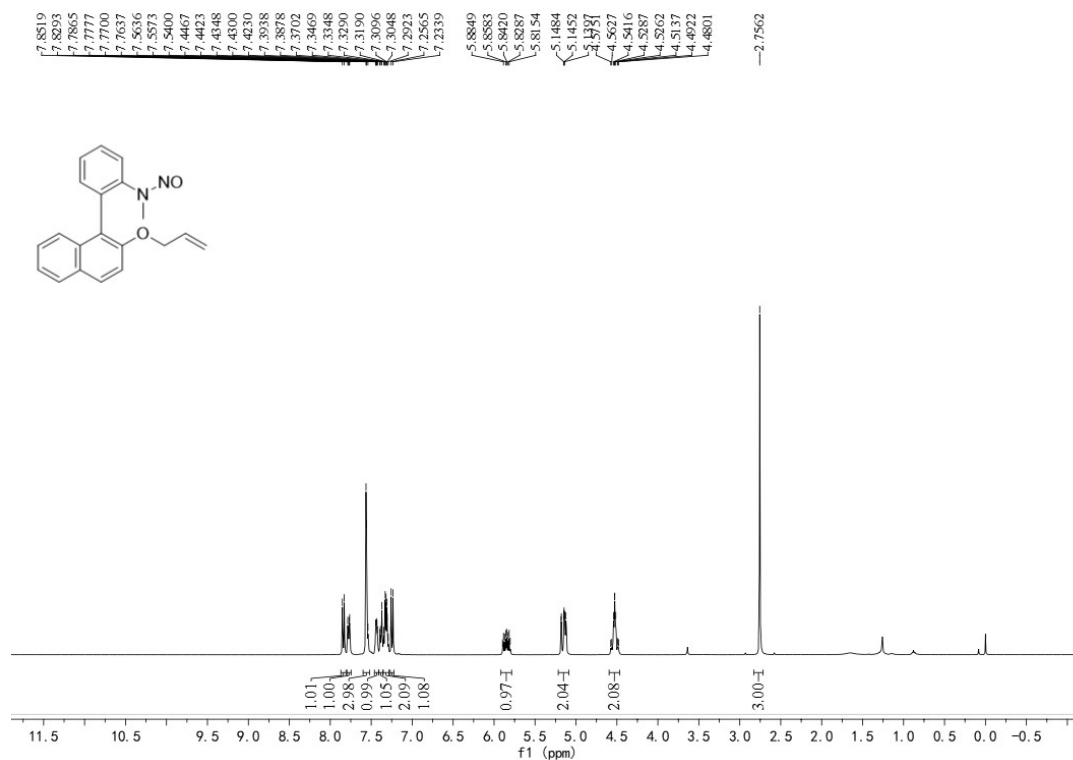

### <sup>13</sup>C NMR (101 MHz) Spectrum of 8 in CDCl<sub>3</sub>

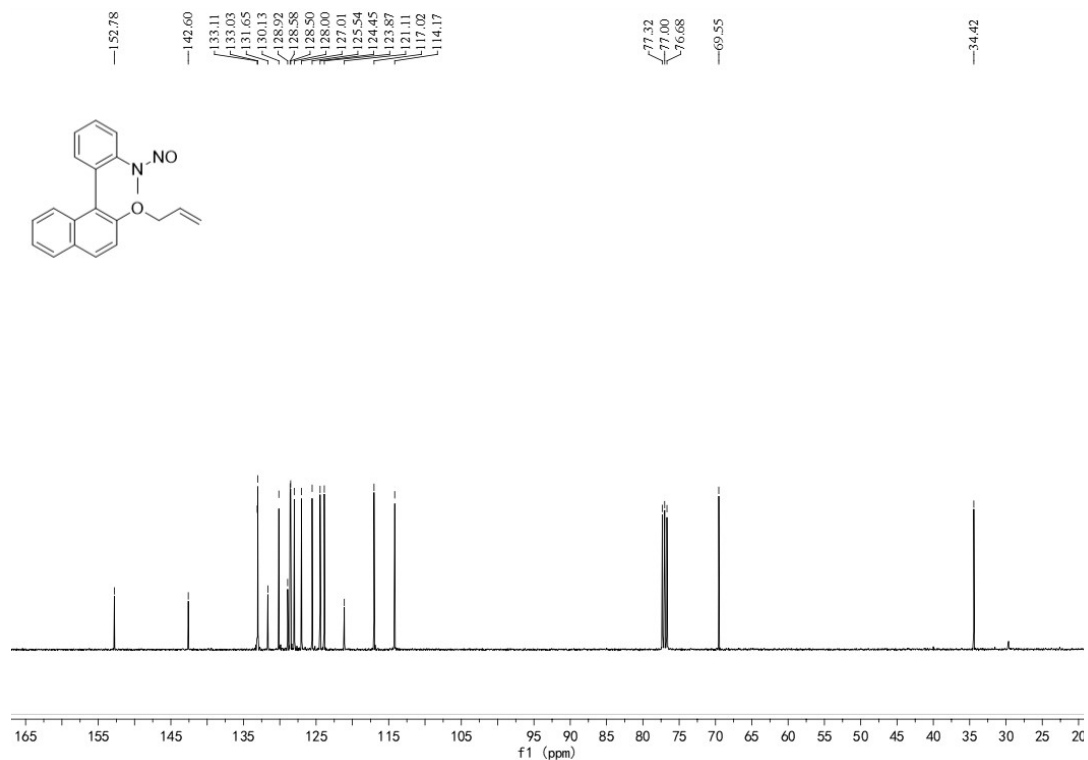

Supplement: d3ob01104f1.pdf [file d3ob01104f1.pdf]
